# Supplementary material for: Functional Gene Array-Based Ultrasensitive and Quantitative Detection of Microbial Populations in Complex Communities
Source: PubMed Central journal article supplement (PMC6581690; doi:10.1128/msystems.00296-19), 2019-06-18
Supplement: mSystems.00296-19-st001.pdf [file mSystems.00296-19-st001.pdf]

Table S1. Functional gene families covered on the GeoChip 5.0.

| Category                                  | Subcategory               | Subcategory 2   | Gene                      | Encoded Enzyme                                            | No. of sequence-specific probes*                          | No. of group-specific probes* | No. of total probes on 5M | No. of covered CDS* | No. of total probes on 5S |      |      |
|-------------------------------------------|---------------------------|-----------------|---------------------------|-----------------------------------------------------------|-----------------------------------------------------------|-------------------------------|---------------------------|---------------------|---------------------------|------|------|
| <b>Categories for Geochemical Cycling</b> |                           |                 |                           |                                                           |                                                           |                               |                           |                     |                           |      |      |
| Carbon Cycling                            | Carbon Degradation        | Agar            | beta_agarase              | Agarase                                                   | 42                                                        | 79                            | 0                         | 217                 | 121                       |      |      |
|                                           |                           | Alginate        | alginate                  | Alginate                                                  | 42                                                        | 79                            | 0                         | 217                 | 121                       |      |      |
|                                           |                           | Cellulose       | Endoglucanase             | Endoglucanase                                             | 45                                                        | 200                           | 0                         | 512                 | 245                       |      |      |
|                                           |                           |                 |                           |                                                           | 45                                                        | 200                           | 0                         | 512                 | 245                       |      |      |
|                                           |                           |                 |                           |                                                           | 198                                                       | 248                           | 446                       | 740                 | 343                       |      |      |
|                                           |                           |                 |                           |                                                           | 198                                                       | 248                           | 446                       | 740                 | 343                       |      |      |
|                                           |                           |                 |                           |                                                           | 119                                                       | 976                           | 1095                      | 3088                | 1116                      |      |      |
|                                           |                           |                 |                           |                                                           | 649                                                       | 1231                          | 1880                      | 3285                | 1411                      |      |      |
|                                           |                           |                 |                           |                                                           | 213                                                       | 334                           | 0                         | 1104                | 547                       |      |      |
|                                           |                           |                 |                           |                                                           | 14                                                        | 55                            | 259                       | 69                  | 69                        |      |      |
|                                           |                           |                 |                           |                                                           | 995                                                       | 2596                          | 2575                      | 7736                | 3143                      |      |      |
|                                           |                           |                 |                           |                                                           | 69                                                        | 373                           | 442                       | 887                 | 0                         |      |      |
|                                           |                           |                 |                           |                                                           | 90                                                        | 610                           | 700                       | 1457                | 0                         |      |      |
|                                           |                           |                 |                           |                                                           | 159                                                       | 983                           | 1142                      | 2344                | 0                         |      |      |
|                                           |                           |                 |                           |                                                           | 172                                                       | 543                           | 715                       | 1367                | 827                       |      |      |
|                                           |                           |                 |                           |                                                           | 159                                                       | 238                           | 397                       | 639                 | 478                       |      |      |
|                                           |                           |                 |                           |                                                           | 150                                                       | 653                           | 803                       | 1739                | 858                       |      |      |
|                                           |                           |                 |                           |                                                           | 481                                                       | 1434                          | 1915                      | 3745                | 2163                      |      |      |
|                                           |                           |                 |                           |                                                           | 7                                                         | 53                            | 0                         | 166                 | 60                        |      |      |
|                                           |                           |                 |                           |                                                           | 7                                                         | 53                            | 0                         | 166                 | 60                        |      |      |
|                                           |                           |                 |                           |                                                           | 8                                                         | 80                            | 0                         | 383                 | 88                        |      |      |
|                                           |                           |                 |                           |                                                           | 8                                                         | 80                            | 0                         | 383                 | 88                        |      |      |
|                                           |                           |                 |                           |                                                           | 103                                                       | 40                            | 143                       | 178                 | 125                       |      |      |
|                                           |                           |                 |                           |                                                           | 50                                                        | 13                            | 63                        | 74                  | 66                        |      |      |
|                                           |                           |                 |                           |                                                           | 188                                                       | 372                           | 560                       | 1009                | 677                       |      |      |
|                                           |                           |                 |                           |                                                           | 341                                                       | 425                           | 766                       | 1261                | 868                       |      |      |
|                                           |                           |                 |                           |                                                           | 53                                                        | 252                           | 305                       | 827                 | 321                       |      |      |
|                                           |                           |                 |                           |                                                           | 25                                                        | 240                           | 265                       | 593                 | 313                       |      |      |
|                                           |                           |                 |                           |                                                           | 50                                                        | 172                           | 322                       | 685                 | 361                       |      |      |
|                                           |                           |                 |                           |                                                           | 32                                                        | 45                            | 77                        | 121                 | 104                       |      |      |
|                                           |                           |                 |                           |                                                           | 104                                                       | 185                           | 289                       | 542                 | 341                       |      |      |
|                                           |                           |                 |                           |                                                           | 264                                                       | 994                           | 1258                      | 2768                | 1440                      |      |      |
|                                           |                           |                 |                           |                                                           | 748                                                       | 5010                          | 5758                      | 15122               | 6508                      |      |      |
|                                           |                           |                 |                           |                                                           | 2                                                         | 13                            | 15                        | 36                  | 18                        |      |      |
|                                           |                           |                 |                           |                                                           | 6                                                         | 8                             | 8                         | 14                  | 14                        |      |      |
|                                           |                           |                 |                           |                                                           | 110                                                       | 518                           | 628                       | 1503                | 488                       |      |      |
|                                           |                           |                 |                           |                                                           | 6                                                         | 1                             | 7                         | 8                   | 0                         |      |      |
|                                           |                           |                 |                           |                                                           | 44                                                        | 127                           | 171                       | 342                 | 0                         |      |      |
|                                           |                           |                 |                           |                                                           | 58                                                        | 385                           | 443                       | 1084                | 413                       |      |      |
|                                           |                           |                 |                           |                                                           | 970                                                       | 6060                          | 7030                      | 18109               | 7441                      |      |      |
|                                           |                           |                 |                           |                                                           | 5                                                         | 59                            | 64                        | 156                 | 75                        |      |      |
|                                           |                           |                 |                           |                                                           | 16                                                        | 69                            | 85                        | 153                 | 92                        |      |      |
|                                           |                           |                 |                           |                                                           | 5                                                         | 6                             | 11                        | 17                  | 8                         |      |      |
|                                           |                           |                 |                           |                                                           | 26                                                        | 134                           | 160                       | 326                 | 175                       |      |      |
|                                           |                           |                 |                           |                                                           | 30                                                        | 215                           | 245                       | 501                 | 219                       |      |      |
|                                           |                           |                 |                           |                                                           | 19                                                        | 48                            | 67                        | 121                 | 79                        |      |      |
|                                           |                           |                 |                           |                                                           | 49                                                        | 263                           | 312                       | 622                 | 286                       |      |      |
|                                           |                           |                 | 355                       | 1349                                                      | 1604                                                      | 3829                          | 1685                      |                     |                           |      |      |
| Carbon Fixation                           | 3-hydroxypropionate cycle | accD            |                           | Acetyl-CoA carboxylase, carboxyl transferase subunit beta | 0                                                         | 4                             | 4                         | 8                   | 5                         |      |      |
|                                           |                           | Mch             |                           | MaoC domain-containing protein dehydratase                | 1                                                         | 0                             | 1                         | 1                   | 1                         |      |      |
|                                           |                           | Mcl             |                           | HpCh/HpaI aldolase                                        | 0                                                         | 2                             | 2                         | 4                   | 3                         |      |      |
|                                           |                           | MCM             |                           | Methylmalonyl-CoA mutase, large subunit                   | 0                                                         | 8                             | 8                         | 16                  | 9                         |      |      |
|                                           |                           | Mcr             |                           | Short-chain dehydrogenase/reductase SDR                   | 0                                                         | 2                             | 2                         | 4                   | 3                         |      |      |
|                                           |                           | Mct             |                           | L-carnitine dehydratase/ole acid-inducible protein F      | 0                                                         | 2                             | 2                         | 4                   | 2                         |      |      |
|                                           |                           | MMCE            |                           | Glyoxalase/bleomycin resistance protein/dioxygenase       | 0                                                         | 2                             | 2                         | 4                   | 3                         |      |      |
|                                           |                           | Pcc_3HP         |                           | Propionyl-CoA carboxylase                                 | 0                                                         | 3                             | 3                         | 6                   | 0                         |      |      |
|                                           |                           | Pcs             |                           | AMP-dependent synthetase/ligase                           | 0                                                         | 2                             | 2                         | 4                   | 3                         |      |      |
|                                           |                           | SdhA            |                           | Succinate dehydrogenase flavoprotein subunit              | 0                                                         | 2                             | 2                         | 4                   | 3                         |      |      |
|                                           |                           |                 |                           |                                                           | 1                                                         | 27                            | 28                        | 55                  | 32                        |      |      |
|                                           |                           |                 |                           |                                                           | 1                                                         | 2                             | 3                         | 5                   | 4                         |      |      |
|                                           |                           |                 |                           |                                                           | 1                                                         | 0                             | 1                         | 1                   | 1                         |      |      |
|                                           |                           |                 |                           |                                                           | 3                                                         | 5                             | 8                         | 13                  | 11                        |      |      |
|                                           |                           |                 |                           |                                                           | 0                                                         | 6                             | 6                         | 12                  | 8                         |      |      |
|                                           |                           |                 |                           |                                                           | 0                                                         | 3                             | 3                         | 17                  | 3                         |      |      |
|                                           |                           |                 |                           |                                                           | 0                                                         | 4                             | 4                         | 8                   | 4                         |      |      |
|                                           |                           |                 |                           |                                                           | 0                                                         | 2                             | 2                         | 4                   | 3                         |      |      |
|                                           |                           |                 |                           |                                                           | 0                                                         | 6                             | 6                         | 12                  | 8                         |      |      |
|                                           |                           |                 |                           |                                                           | 0                                                         | 6                             | 6                         | 12                  | 7                         |      |      |
|                                           |                           |                 |                           |                                                           | 1                                                         | 2                             | 3                         | 4                   | 3                         |      |      |
|                                           |                           |                 |                           |                                                           | 3                                                         | 0                             | 3                         | 3                   | 3                         |      |      |
|                                           |                           |                 |                           |                                                           | 2                                                         | 1                             | 3                         | 4                   | 3                         |      |      |
|                                           |                           |                 |                           |                                                           | 11                                                        | 37                            | 48                        | 95                  | 58                        |      |      |
|                                           |                           |                 |                           |                                                           | 17                                                        | 231                           | 248                       | 533                 | 279                       |      |      |
|                                           |                           |                 |                           |                                                           | 2                                                         | 11                            | 13                        | 26                  | 17                        |      |      |
|                                           |                           |                 |                           |                                                           | 1                                                         | 7                             | 8                         | 15                  | 9                         |      |      |
|                                           |                           |                 |                           |                                                           | 26                                                        | 507                           | 533                       | 1137                | 604                       |      |      |
|                                           |                           |                 |                           |                                                           | 4                                                         | 33                            | 37                        | 79                  | 44                        |      |      |
|                                           |                           |                 |                           |                                                           | 5                                                         | 33                            | 38                        | 72                  | 46                        |      |      |
|                                           |                           |                 |                           |                                                           | 0                                                         | 7                             | 7                         | 14                  | 12                        |      |      |
|                                           |                           |                 |                           |                                                           | 55                                                        | 829                           | 884                       | 1870                | 1011                      |      |      |
|                                           |                           |                 |                           |                                                           | 24                                                        | 178                           | 202                       | 424                 | 223                       |      |      |
|                                           |                           |                 |                           |                                                           | 23                                                        | 371                           | 394                       | 994                 | 437                       |      |      |
|                                           |                           |                 |                           |                                                           | 41                                                        | 444                           | 485                       | 1014                | 541                       |      |      |
|                                           |                           |                 |                           |                                                           | 18                                                        | 231                           | 249                       | 552                 | 277                       |      |      |
|                                           |                           |                 |                           |                                                           | 16                                                        | 268                           | 284                       | 632                 | 310                       |      |      |
|                                           |                           |                 |                           |                                                           | 9                                                         | 158                           | 167                       | 354                 | 191                       |      |      |
|                                           |                           |                 |                           |                                                           | 208                                                       | 262                           | 470                       | 807                 | 534                       |      |      |
|                                           |                           |                 |                           |                                                           | 22                                                        | 283                           | 305                       | 713                 | 340                       |      |      |
|                                           |                           |                 |                           |                                                           | 42                                                        | 525                           | 567                       | 1186                | 632                       |      |      |
|                                           |                           |                 |                           |                                                           | 403                                                       | 2720                          | 3123                      | 6676                | 3485                      |      |      |
|                                           |                           |                 |                           |                                                           | 0                                                         | 11                            | 11                        | 22                  | 11                        |      |      |
|                                           |                           |                 |                           |                                                           | 9                                                         | 17                            | 26                        | 43                  | 28                        |      |      |
|                                           |                           |                 |                           |                                                           | 2                                                         | 3                             | 5                         | 8                   | 6                         |      |      |
|                                           |                           |                 |                           |                                                           | 0                                                         | 13                            | 13                        | 30                  | 13                        |      |      |
|                                           |                           |                 |                           |                                                           | 8                                                         | 5                             | 13                        | 18                  | 0                         |      |      |
|                                           |                           |                 | 0                         | 31                                                        | 31                                                        | 65                            | 37                        |                     |                           |      |      |
|                                           |                           |                 | 0                         | 9                                                         | 9                                                         | 18                            | 12                        |                     |                           |      |      |
|                                           |                           |                 | 0                         | 23                                                        | 23                                                        | 47                            | 25                        |                     |                           |      |      |
|                                           |                           |                 | 1                         | 15                                                        | 16                                                        | 31                            | 16                        |                     |                           |      |      |
|                                           |                           |                 | 3                         | 34                                                        | 37                                                        | 71                            | 42                        |                     |                           |      |      |
|                                           |                           |                 | 1                         | 2                                                         | 3                                                         | 5                             | 4                         |                     |                           |      |      |
|                                           |                           |                 | 0                         | 18                                                        | 18                                                        | 36                            | 21                        |                     |                           |      |      |
|                                           | Carbon Degradation Total  |                 |                           |                                                           | 3585                                                      | 13549                         | 16004                     | 38929               | 16385                     |      |      |
|                                           |                           | Carbon Fixation | 3-hydroxypropionate cycle | accD                                                      | Acetyl-CoA carboxylase, carboxyl transferase subunit beta | 0                             | 4                         | 4                   | 8                         | 5    |      |
|                                           |                           |                 |                           | Mch                                                       | MaoC domain-containing protein dehydratase                | 1                             | 0                         | 1                   | 1                         | 1    |      |
|                                           |                           |                 |                           | Mcl                                                       | HpCh/HpaI aldolase                                        | 0                             | 2                         | 2                   | 4                         | 3    |      |
|                                           |                           |                 |                           | MCM                                                       | Methylmalonyl-CoA mutase, large subunit                   | 0                             | 8                         | 8                   | 16                        | 9    |      |
|                                           |                           |                 |                           | Mcr                                                       | Short-chain dehydrogenase/reductase SDR                   | 0                             | 2                         | 2                   | 4                         | 3    |      |
|                                           |                           |                 |                           | Mct                                                       | L-carnitine dehydratase/ole acid-inducible protein F      | 0                             | 2                         | 2                   | 4                         | 2    |      |
|                                           |                           |                 |                           | MMCE                                                      | Glyoxalase/bleomycin resistance protein/dioxygenase       | 0                             | 2                         | 2                   | 4                         | 3    |      |
|                                           |                           |                 |                           | Pcc_3HP                                                   | Propionyl-CoA carboxylase                                 | 0                             | 3                         | 3                   | 6                         | 0    |      |
|                                           |                           |                 |                           | Pcs                                                       | AMP-dependent synthetase/ligase                           | 0                             | 2                         | 2                   | 4                         | 3    |      |
|                                           |                           |                 |                           | SdhA                                                      | Succinate dehydrogenase flavoprotein subunit              | 0                             | 2                         | 2                   | 4                         | 3    |      |
|                                           |                           |                 |                           |                                                           |                                                           |                               | 1                         | 27                  | 28                        | 55   | 32   |
|                                           |                           |                 |                           |                                                           |                                                           |                               | 1                         | 2                   | 3                         | 5    | 4    |
|                                           |                           |                 |                           |                                                           |                                                           |                               | 1                         | 0                   | 1                         | 1    | 1    |
|                                           |                           |                 |                           |                                                           |                                                           |                               | 3                         | 5                   | 8                         | 13   | 11   |
|                                           |                           |                 |                           |                                                           |                                                           |                               | 0                         | 6                   | 6                         | 12   | 8    |
|                                           |                           |                 |                           |                                                           |                                                           |                               | 0                         | 3                   | 3                         | 17   | 3    |
|                                           |                           |                 |                           |                                                           |                                                           |                               | 0                         | 4                   | 4                         | 8    | 4    |
|                                           |                           |                 |                           |                                                           |                                                           |                               | 0                         | 2                   | 2                         | 4    | 3    |
|                                           |                           |                 |                           |                                                           |                                                           |                               | 0                         | 6                   | 6                         | 12   | 8    |
|                                           |                           |                 |                           |                                                           |                                                           |                               | 0                         | 6                   | 6                         | 12   | 7    |
|                                           |                           |                 |                           |                                                           |                                                           |                               | 1                         | 2                   | 3                         | 4    | 3    |
|                                           |                           |                 |                           |                                                           |                                                           |                               | 3                         | 0                   | 3                         | 3    | 3    |
|                                           |                           |                 |                           |                                                           |                                                           |                               | 2                         | 1                   | 3                         | 4    | 3    |
|                                           |                           |                 |                           |                                                           |                                                           |                               | 11                        | 37                  | 48                        | 95   | 58   |
|                                           |                           |                 |                           |                                                           |                                                           |                               | 17                        | 231                 | 248                       | 533  | 279  |
|                                           |                           |                 |                           |                                                           |                                                           |                               | 2                         | 11                  | 13                        | 26   | 17   |
|                                           |                           |                 |                           |                                                           |                                                           |                               | 1                         | 7                   | 8                         | 15   | 9    |
|                                           |                           |                 |                           |                                                           |                                                           |                               | 26                        | 507                 | 533                       | 1137 | 604  |
|                                           |                           |                 |                           |                                                           |                                                           |                               | 4                         | 33                  | 37                        | 79   | 44   |
|                                           |                           |                 |                           |                                                           |                                                           |                               | 5                         | 33                  | 38                        | 72   | 46   |
|                                           |                           |                 |                           |                                                           |                                                           |                               | 0                         | 7                   | 7                         | 14   | 12   |
|                                           |                           |                 |                           |                                                           |                                                           |                               | 55                        | 829                 | 884                       | 1870 | 1011 |
|                                           |                           |                 |                           |                                                           |                                                           |                               | 24                        | 178                 | 202                       | 424  | 223  |
|                                           |                           |                 |                           |                                                           |                                                           |                               | 23                        | 371                 | 394                       | 994  | 437  |
|                                           |                           |                 |                           |                                                           |                                                           |                               | 41                        | 444                 | 485                       | 1014 | 541  |
|                                           |                           |                 |                           |                                                           |                                                           |                               | 18                        | 231                 | 249                       | 552  | 277  |
|                                           |                           |                 |                           |                                                           |                                                           |                               | 16                        | 268                 | 284                       | 632  | 310  |
|                                           |                           |                 |                           |                                                           |                                                           |                               | 9                         | 158                 | 167                       | 354  | 191  |
|                                           |                           |                 |                           |                                                           |                                                           |                               | 208                       | 262                 | 470                       | 807  | 534  |
|                                           |                           |                 |                           |                                                           |                                                           |                               | 22                        | 283                 | 305                       | 713  | 340  |
|                                           |                           |                 |                           |                                                           |                                                           |                               | 42                        | 525                 | 567                       | 1186 | 632  |
|                                           |                           |                 |                           |                                                           |                                                           |                               | 403                       | 2720                | 3123                      | 6676 | 3485 |
|                                           |                           |                 |                           |                                                           |                                                           |                               | 0                         | 11                  | 11                        | 22   | 11   |
|                                           |                           |                 |                           |                                                           |                                                           |                               | 9                         | 17                  | 26                        | 43   | 28   |
|                                           |                           |                 |                           |                                                           |                                                           |                               | 2                         | 3                   | 5                         | 8    | 6    |
|                                           |                           |                 |                           |                                                           |                                                           |                               | 0                         | 13                  | 13                        | 30   | 13   |
|                                           |                           |                 |                           |                                                           |                                                           | 8                             | 5                         | 13                  | 18                        | 0    |      |
|                                           |                           |                 |                           |                                                           | 0                                                         | 31                            | 31                        | 65                  | 37                        |      |      |
|                                           |                           |                 |                           |                                                           | 0                                                         | 9                             | 9                         | 18                  | 12                        |      |      |
|                                           |                           |                 |                           |                                                           | 0                                                         | 23                            | 23                        | 47                  | 25                        |      |      |
|                                           |                           |                 |                           |                                                           | 1                                                         | 15                            | 16                        | 31                  | 16                        |      |      |
|                                           |                           |                 |                           |                                                           | 3                                                         | 34                            | 37                        | 71                  | 42                        |      |      |
|                                           |                           |                 |                           |                                                           | 1                                                         | 2                             | 3                         | 5                   | 4                         |      |      |
|                                           |                           |                 |                           |                                                           | 0                                                         | 18                            | 18                        | 36                  | 21                        |      |      |
|                                           |                           |                 |                           |                                                           | 0                                                         | 18                            | 18                        | 36                  | 21                        |      |      |

|                           |                                    |                                        | Dicarboxylate/4-hydroxybutyrate cycle Total             |                                                                |                                                                                                                   |       |       |       |      |      |
|---------------------------|------------------------------------|----------------------------------------|---------------------------------------------------------|----------------------------------------------------------------|-------------------------------------------------------------------------------------------------------------------|-------|-------|-------|------|------|
|                           |                                    |                                        | 24                                                      | 181                                                            | 205                                                                                                               | 394   | 215   |       |      |      |
| N Cycling                 | multiple systems                   | Pcc                                    | Propionyl-CoA carboxylase                               | 31                                                             | 474                                                                                                               | 505   | 995   | 0     |      |      |
|                           | Reductive acetyl-CoA pathway       | Codh                                   | Carbon monoxide dehydrogenase large subunit             | 31                                                             | 474                                                                                                               | 505   | 995   | 0     |      |      |
|                           |                                    | Fhfs                                   | Formate-tetrahydrofolate ligase                         | 60                                                             | 259                                                                                                               | 319   | 765   | 151   |      |      |
|                           |                                    |                                        |                                                         |                                                                | 213                                                                                                               | 782   | 995   | 2175  | 1151 |      |
|                           |                                    |                                        |                                                         | Reductive acetyl-CoA pathway Total                             |                                                                                                                   |       |       |       |      |      |
|                           | Reductive tricarboxylic acid cycle | AcIb                                   | Succinyl-CoA synthetase, beta subunit                   | 173                                                            | 75                                                                                                                | 92    | 181   | 31    |      |      |
|                           |                                    | AcnA                                   | Aconitate hydratase 2                                   | 1                                                              | 62                                                                                                                | 63    | 185   | 70    |      |      |
|                           |                                    | Cd                                     | Citrate synthase                                        | 3                                                              | 8                                                                                                                 | 11    | 21    | 14    |      |      |
|                           |                                    | FrdA_rTCA                              | Succinate dehydrogenase, flavoprotein subunit           | 4                                                              | 88                                                                                                                | 92    | 312   | 95    |      |      |
|                           |                                    | Icd                                    | Iso citrate dehydrogenase                               | 0                                                              | 6                                                                                                                 | 6     | 15    | 7     |      |      |
|                           |                                    | Mdh                                    | Malate dehydrogenase                                    | 3                                                              | 53                                                                                                                | 56    | 117   | 63    |      |      |
|                           |                                    | OorA                                   | 2-Oxoglutarate ferredoxin oxidoreductase, alpha subunit | 0                                                              | 43                                                                                                                | 43    | 96    | 46    |      |      |
|                           | SucD                               | Succinyl-CoA synthetase, alpha subunit | 2                                                       | 39                                                             | 41                                                                                                                | 131   | 46    |       |      |      |
|                           |                                    |                                        |                                                         | 30                                                             | 374                                                                                                               | 404   | 1058  | 372   |      |      |
|                           |                                    |                                        |                                                         | Reductive tricarboxylic acid cycle Total                       |                                                                                                                   |       |       |       |      |      |
|                           |                                    |                                        |                                                         | 828                                                            | 5683                                                                                                              | 6511  | 14083 | 6475  |      |      |
|                           | Methane Metabolism                 | Methane oxidation                      |                                                         | Mmox                                                           | Soluble methane monoxygenase hydroxylase component alpha-subunit                                                  | 13    | 17    | 30    | 50   | 43   |
|                           |                                    |                                        |                                                         | Pmoa                                                           | Particulate methane monoxygenase                                                                                  | 97    | 30    | 127   | 191  | 203  |
|                           |                                    |                                        |                                                         | Methane oxidation Total                                        |                                                                                                                   |       |       |       |      |      |
|                           |                                    |                                        | 110                                                     | 47                                                             | 157                                                                                                               | 241   | 246   |       |      |      |
| N Cycling                 | Methanogenesis                     |                                        | AckA                                                    | Acetate kinase                                                 | 1                                                                                                                 | 2     | 3     | 5     | 0    |      |
|                           |                                    |                                        | Acs                                                     | AMP-dependent synthetase and ligase                            | 1                                                                                                                 | 3     | 4     | 7     | 0    |      |
|                           |                                    |                                        | CdhC_methane                                            | Acetyl-CoA decarboxylase/synthase complex subunit beta         | 1                                                                                                                 | 8     | 9     | 21    | 0    |      |
|                           |                                    |                                        | FmdB_fwdb                                               | Molybdenum formylmethanofuran dehydrogenase subunit B          | 4                                                                                                                 | 77    | 81    | 160   | 0    |      |
|                           |                                    |                                        | Ftr                                                     | Formylmethanofuran/tetrahydromethanopterin N-formyltransferase | 1                                                                                                                 | 40    | 41    | 85    | 0    |      |
|                           |                                    |                                        | HdrB                                                    | CoB-CoM heterodisulfide reductase                              | 18                                                                                                                | 266   | 284   | 575   | 0    |      |
|                           |                                    |                                        | Hmd                                                     | H[2]-dependent methylenetetrahydromethanopterin dehydrogenase  | 2                                                                                                                 | 27    | 29    | 60    | 0    |      |
|                           |                                    |                                        | Mch_methane                                             | N[5](10)-methylene tetrahydromethanopterin cyclohydrolase      | 0                                                                                                                 | 40    | 40    | 80    | 0    |      |
|                           |                                    |                                        | McrA                                                    | Methyl-coenzyme M reductase alpha subunit                      | 123                                                                                                               | 71    | 194   | 386   | 319  |      |
|                           |                                    |                                        | Mer_methane                                             | 5,10-methylene tetrahydromethanopterin reductase               | 2                                                                                                                 | 28    | 30    | 58    | 0    |      |
|                           |                                    |                                        | MtrH                                                    | Tetrahydromethanopterin S-methyltransferase, MtrH subunit      | 3                                                                                                                 | 64    | 67    | 132   | 0    |      |
|                           |                                    |                                        | MT2                                                     | Methylcobalamin:coenzyme M methyltransferase                   | 1                                                                                                                 | 37    | 38    | 75    | 0    |      |
|                           |                                    |                                        | MtaB                                                    | Methanol-cobalamin methyltransferase B subunit                 | 1                                                                                                                 | 28    | 29    | 58    | 0    |      |
|                           |                                    |                                        | MtaC                                                    | Methanol corrinoid protein                                     | 0                                                                                                                 | 12    | 12    | 24    | 0    |      |
|                           |                                    |                                        | MtbB                                                    | Dimethylamine:corrinoid methyltransferase                      | 0                                                                                                                 | 10    | 10    | 22    | 0    |      |
|                           |                                    |                                        | MtbC_mttC                                               | Methyltransferase cognate corrinoid protein                    | 0                                                                                                                 | 27    | 27    | 58    | 0    |      |
|                           |                                    |                                        | MtmB                                                    | Monomethylamine methyltransferase MtmB                         | 0                                                                                                                 | 9     | 9     | 27    | 0    |      |
|                           |                                    |                                        | MtmC                                                    | Methyltransferase cognate corrinoid protein                    | 0                                                                                                                 | 8     | 8     | 18    | 0    |      |
|                           |                                    |                                        | MttB                                                    | Trimethylamine methyltransferase                               | 1                                                                                                                 | 13    | 14    | 27    | 0    |      |
|                           |                                    |                                        | Mtox                                                    | Methyltransferase                                              | 1                                                                                                                 | 10    | 11    | 21    | 0    |      |
|                           |                                    |                                        | Pta                                                     | Phosphotransacetylase                                          | 0                                                                                                                 | 3     | 3     | 6     | 0    |      |
|                           |                                    |                                        |                                                         | Methanogenesis Total                                           |                                                                                                                   |       |       |       |      |      |
|                           |                                    |                                        |                                                         | 160                                                            | 783                                                                                                               | 943   | 1905  | 319   |      |      |
|                           |                                    |                                        |                                                         | 270                                                            | 830                                                                                                               | 1100  | 2146  | 565   |      |      |
|                           |                                    |                                        |                                                         | 4683                                                           | 20062                                                                                                             | 23615 | 55158 | 23425 |      |      |
|                           | Carbon Cycling Total               |                                        |                                                         |                                                                |                                                                                                                   |       |       |       |      |      |
|                           | N Cycling                          | Ammonification                         |                                                         | gdh                                                            | Glutamate dehydrogenase                                                                                           | 74    | 322   | 396   | 794  | 474  |
|                           |                                    |                                        | Urec                                                    | Urease/ Urea amidohydrolase, alpha subunit                     | 126                                                                                                               | 436   | 562   | 1157  | 626  |      |
|                           |                                    |                                        | 200                                                     | 758                                                            | 958                                                                                                               | 1951  | 1100  |       |      |      |
|                           |                                    |                                        | Ammonification Total                                    |                                                                |                                                                                                                   |       |       |       |      |      |
| Anammox                   |                                    | Anammox                                |                                                         | Hzo                                                            | Hydrazine oxidoreductase                                                                                          | 16    | 5     | 21    | 50   | 36   |
|                           |                                    |                                        |                                                         | Hrsa                                                           | Hydrazine synthase subunit A, partial                                                                             | 7     | 3     | 10    | 17   | 17   |
|                           |                                    |                                        | 23                                                      | 8                                                              | 31                                                                                                                | 67    | 53    |       |      |      |
|                           |                                    |                                        | Anammox Total                                           |                                                                |                                                                                                                   |       |       |       |      |      |
| Assimilatory N reduction  |                                    | Assimilatory N reduction               |                                                         | NarB                                                           | Nitrate reductase                                                                                                 | 14    | 53    | 67    | 161  | 78   |
|                           |                                    |                                        |                                                         | Nasa                                                           | Assimilatory nitrate reductase                                                                                    | 71    | 90    | 161   | 287  | 185  |
|                           |                                    |                                        |                                                         | NiR                                                            | Ferredoxin-nitrite reductase                                                                                      | 15    | 54    | 69    | 130  | 0    |
|                           |                                    |                                        |                                                         | Nira                                                           | Ferredoxin-nitrite reductase                                                                                      | 26    | 38    | 64    | 111  | 90   |
|                           |                                    |                                        | Nirb                                                    | Assimilatory nitrite reductase large subunit                   | 8                                                                                                                 | 95    | 103   | 214   | 130  |      |
|                           |                                    |                                        |                                                         | 134                                                            | 330                                                                                                               | 464   | 903   | 483   |      |      |
|                           |                                    |                                        | Assimilatory N reduction Total                          |                                                                |                                                                                                                   |       |       |       |      |      |
| Denitrification           | Denitrification                    |                                        | ChorB                                                   | Nitric oxide reductase subunit B                               | 8                                                                                                                 | 16    | 24    | 42    | 0    |      |
|                           |                                    |                                        | Nareg                                                   | Dissimilatory membrane-bound nitrate reductase                 | 509                                                                                                               | 243   | 752   | 1165  | 923  |      |
|                           |                                    |                                        | Nirk                                                    | Nitrite reductase                                              | 227                                                                                                               | 109   | 336   | 628   | 500  |      |
|                           |                                    |                                        | Nirs                                                    | Nitrite reductase                                              | 340                                                                                                               | 119   | 459   | 722   | 619  |      |
|                           |                                    |                                        | Norb                                                    | Nitric-oxide reductase                                         | 43                                                                                                                | 51    | 94    | 157   | 124  |      |
|                           |                                    |                                        | Nozr                                                    | Nitrous oxide reductase                                        | 212                                                                                                               | 439   | 651   | 1396  | 802  |      |
|                           |                                    |                                        |                                                         | 1339                                                           | 977                                                                                                               | 2316  | 4110  | 2988  |      |      |
|                           |                                    |                                        | Denitrification Total                                   |                                                                |                                                                                                                   |       |       |       |      |      |
| Dissimilatory N reduction | Dissimilatory N reduction          |                                        | Napa                                                    | Periplasmic nitrate reductase                                  | 125                                                                                                               | 105   | 230   | 370   | 239  |      |
|                           |                                    |                                        | Nrfa                                                    | Formate-dependent cytochrome c nitrite reductase, c552 subunit | 36                                                                                                                | 255   | 291   | 695   | 250  |      |
|                           |                                    |                                        |                                                         | 161                                                            | 360                                                                                                               | 521   | 1065  | 489   |      |      |
|                           |                                    |                                        | Dissimilatory N Reduction Total                         |                                                                |                                                                                                                   |       |       |       |      |      |
| Nitrification             | Nitrification                      |                                        | Amoa                                                    | Ammonia monoxygenase                                           | 46                                                                                                                | 13    | 59    | 95    | 62   |      |
|                           |                                    |                                        | Amoa_quasi                                              | Ammonia monoxygenase                                           | 197                                                                                                               | 57    | 254   | 478   | 0    |      |
|                           |                                    |                                        | Hao                                                     | Hydroxylamine oxidoreductase                                   | 33                                                                                                                | 28    | 61    | 102   | 81   |      |
|                           |                                    |                                        | Nera                                                    | Nitrite oxidoreductase alpha subunit, partial                  | 1                                                                                                                 | 1     | 2     | 2     | 2    |      |
|                           |                                    |                                        |                                                         | 277                                                            | 99                                                                                                                | 376   | 682   | 145   |      |      |
|                           |                                    |                                        | Nitrification Total                                     |                                                                |                                                                                                                   |       |       |       |      |      |
| Nitrogen fixation         | Nitrogen fixation                  |                                        | NifH                                                    | Dinitrogenase reductase                                        | 263                                                                                                               | 1068  | 1331  | 3114  | 1557 |      |
|                           |                                    |                                        |                                                         | 263                                                            | 1068                                                                                                              | 1331  | 3114  | 1557  |      |      |
|                           |                                    |                                        | Nitrogen Fixation Total                                 |                                                                |                                                                                                                   |       |       |       |      |      |
|                           |                                    |                                        | 2397                                                    | 3600                                                           | 5997                                                                                                              | 11892 | 6795  |       |      |      |
| P Cycling                 | Phosphorous oxidation              |                                        | Sf1_htxA                                                | Hypophosphite dioxygenase, alpha-ketoglutarate-dependent       | 1                                                                                                                 | 1     | 2     | 5     | 0    |      |
|                           |                                    |                                        | Sf1_ptxD                                                | Phosphonate dehydrogenase                                      | 2                                                                                                                 | 9     | 11    | 25    | 0    |      |
|                           |                                    |                                        |                                                         | 3                                                              | 10                                                                                                                | 13    | 28    | 0     |      |      |
|                           |                                    |                                        |                                                         | Phosphorous Oxidation Total                                    |                                                                                                                   |       |       |       |      |      |
|                           | Phytic acid hydrolysis             | Phytic acid hydrolysis                 |                                                         | Phytase                                                        | Phytase                                                                                                           | 98    | 137   | 235   | 408  | 257  |
|                           |                                    |                                        |                                                         |                                                                | 98                                                                                                                | 137   | 235   | 408   | 257  |      |
|                           |                                    |                                        |                                                         | Phytic Acid Hydrolysis Total                                   |                                                                                                                   |       |       |       |      |      |
|                           | Polyphosphate degradation          | Polyphosphate degradation              |                                                         | Sf1_ppk2                                                       | Polyphosphate Kinase                                                                                              | 431   | 606   | 1037  | 1795 | 0    |
|                           |                                    |                                        |                                                         | Sf1_ppn                                                        | Endopolyphosphatase/metaphosphatase                                                                               | 28    | 14    | 42    | 50   | 0    |
|                           |                                    |                                        |                                                         | Ppx                                                            | Exopolyphosphatase                                                                                                | 266   | 1184  | 1450  | 3065 | 1600 |
|                           |                                    |                                        |                                                         | 725                                                            | 1804                                                                                                              | 2529  | 4910  | 1600  |      |      |
|                           |                                    |                                        |                                                         | Polyphosphate degradation Total                                |                                                                                                                   |       |       |       |      |      |
| Polyphosphate synthesis   | Polyphosphate synthesis            |                                        | Ppk                                                     | Polyphosphate kinase                                           | 134                                                                                                               | 349   | 483   | 899   | 562  |      |
|                           |                                    |                                        |                                                         | 134                                                            | 349                                                                                                               | 483   | 899   | 562   |      |      |
|                           |                                    |                                        | Polyphosphate Synthesis Total                           |                                                                |                                                                                                                   |       |       |       |      |      |
|                           |                                    |                                        | 960                                                     | 2300                                                           | 3260                                                                                                              | 6245  | 2419  |       |      |      |
| S Cycling                 | Adenylylsulfate reductase          |                                        | AprA                                                    | Adenylylsulfate reductase                                      | 60                                                                                                                | 0     | 78    | 95    | 0    |      |
|                           |                                    |                                        | Aps_apsA                                                | Adenylylsulfate reductase                                      | 154                                                                                                               | 68    | 222   | 330   | 323  |      |
|                           |                                    |                                        | APS_AprB                                                | Adenylylsulfate reductase                                      | 44                                                                                                                | 62    | 106   | 193   | 136  |      |
|                           |                                    |                                        |                                                         | 266                                                            | 140                                                                                                               | 406   | 618   | 459   |      |      |
|                           |                                    |                                        |                                                         | Adenylylsulfate Reductase Total                                |                                                                                                                   |       |       |       |      |      |
|                           | DMSP degradation                   | DMSP degradation                       |                                                         | Sf1_DMSP_lyase                                                 | Dimethylsulfoniopropionate lyase/dimethylsulfoniopropionate lyase/DMSP lyase/Dimethylpropiothetin dethiomethylase | 18    | 9     | 27    | 62   | 0    |
|                           |                                    |                                        |                                                         | DmdA                                                           | Dimethylsulfoniopropionate demethylase/DMSP demethylase                                                           | 8     | 77    | 85    | 167  | 86   |
|                           |                                    |                                        |                                                         | 26                                                             | 86                                                                                                                | 112   | 229   | 86    |      |      |
|                           |                                    |                                        |                                                         | DMSP Degradation Total                                         |                                                                                                                   |       |       |       |      |      |
|                           | Sulfide Oxidation                  | Sulfide Oxidation                      |                                                         | Fccab                                                          | Flavoctochrome c sulfide dehydrogenase                                                                            | 27    | 104   | 131   | 236  | 143  |
|                           |                                    |                                        | Sqr                                                     | Sulfide-quinone reductase, putative                            | 35                                                                                                                | 102   | 137   | 297   | 158  |      |
|                           |                                    |                                        | 62                                                      | 206                                                            | 268                                                                                                               | 533   | 301   |       |      |      |
|                           |                                    |                                        | Sulfide Oxidation Total                                 |                                                                |                                                                                                                   |       |       |       |      |      |
| Sulfite reduction         | Sulfite reduction                  |                                        | Dsra                                                    | Anaerobic sulfite reductase, subunit C                         | 788                                                                                                               | 365   | 1153  | 1612  | 1395 |      |
|                           |                                    |                                        | DsrB                                                    | Dissimilatory sulfite reductase subunit B                      | 563                                                                                                               | 216   | 779   | 1080  | 940  |      |
|                           |                                    |                                        | Sir                                                     | Sulfite:quinone oxidoreductase                                 | 78                                                                                                                | 239   | 317   | 583   | 365  |      |
|                           |                                    |                                        | CysJ                                                    | Sulfite reductase (NADPH) flavoprotein subunit alpha           | 51                                                                                                                | 358   | 409   | 865   | 475  |      |
|                           |                                    |                                        | CysI                                                    | Sulfite reductase hemoprotein beta component                   | 47                                                                                                                | 262   | 309   | 645   | 397  |      |
|                           |                                    |                                        |                                                         | 1527                                                           | 1440                                                                                                              | 2967  | 4786  | 3572  |      |      |
|                           |                                    |                                        | Sulfite Reduction Total                                 |                                                                |                                                                                                                   |       |       |       |      |      |
| Sulfur Oxidation          | Sulfur Oxidation                   |                                        | SoxA                                                    | Sulfur oxidation protein (SoxA)                                | 12                                                                                                                | 33    | 45    | 84    | 63   |      |
|                           |                                    |                                        | SoxB                                                    | Sulfur oxidation protein SoxB                                  | 15                                                                                                                | 31    | 46    | 194   | 114  |      |
|                           |                                    |                                        | SoxC                                                    | Sulfite dehydrogenase                                          | 12                                                                                                                | 43    | 55    | 172   | 78   |      |
|                           |                                    |                                        | SoxV                                                    | SoxV gene product                                              | 1                                                                                                                 | 15    | 16    | 31    | 16   |      |
|                           |                                    |                                        | SoxY                                                    | Ssulfur oxidation protein SoxZ                                 | 48                                                                                                                | 323   | 371   | 783   | 287  |      |
|                           |                                    |                                        | 88                                                      | 445                                                            | 533                                                                                                               | 1264  | 558   |       |      |      |
|                           |                                    |                                        | Sulfur Oxidation Total                                  |                                                                |                                                                                                                   |       |       |       |      |      |
|                           |                                    |                                        | 1969                                                    | 2317                                                           | 4286                                                                                                              | 7430  | 4976  |       |      |      |

Categories Related to Microbial Response to Environmental Conditions

Metal Homeostasis

| Element             | Category       | Gene                         | Protein                                                                  | Count                                     | Value 1     | Value 2                     | Value 3     | Value 4      | Value 5     |          |          |
|---------------------|----------------|------------------------------|--------------------------------------------------------------------------|-------------------------------------------|-------------|-----------------------------|-------------|--------------|-------------|----------|----------|
| Aluminum            | Transport      | Al                           | Aluminum resistance protein                                              | 30                                        | 316         | 346                         | 943         | 0            |             |          |          |
|                     |                | <b>Aluminum Total</b>        |                                                                          | <b>30</b>                                 | <b>316</b>  | <b>346</b>                  | <b>943</b>  | <b>0</b>     |             |          |          |
| Arsenic             | Detoxification | Aoxb                         | Arsenite oxidase                                                         | 83                                        | 75          | 158                         | 372         | 245          |             |          |          |
|                     |                | Arra                         | Respiratory arsenate reductase                                           | 37                                        | 52          | 89                          | 224         | 115          |             |          |          |
|                     |                | ArsC                         | Arsenate reductase                                                       | 70                                        | 946         | 1016                        | 2605        | 1098         |             |          |          |
|                     |                | Arsm                         | Arsenite S-adenosylmethyltransferase                                     | 19                                        | 71          | 90                          | 175         | 102          |             |          |          |
|                     |                | Arxa                         | Anaerobic arsenite oxidase                                               | 0                                         | 3           | 3                           | 6           | 4            |             |          |          |
|                     |                |                              |                                                                          | <b>Arsenic Detoxification Total</b>       | <b>209</b>  | <b>1147</b>                 | <b>1356</b> | <b>3382</b>  | <b>1564</b> |          |          |
|                     |                | Transport                    | ArsB                                                                     | Arsenical pump membrane protein, putative | 115         | 763                         | 878         | 1930         | 0           |          |          |
|                     |                |                              |                                                                          | <b>Arsenic Transport Total</b>            | <b>115</b>  | <b>763</b>                  | <b>878</b>  | <b>1930</b>  | <b>0</b>    |          |          |
|                     |                |                              |                                                                          | <b>Arsenic Total</b>                      | <b>324</b>  | <b>1910</b>                 | <b>2234</b> | <b>5312</b>  | <b>1564</b> |          |          |
|                     | Boron          | Transport                    | Atr1                                                                     | Borate transporter                        | 11          | 8                           | 19          | 27           | 0           |          |          |
| Bor1                |                |                              | Boron efflux transporter, putative                                       | 3                                         | 6           | 9                           | 15          | 0            |             |          |          |
|                     |                |                              | <b>Boron Total</b>                                                       | <b>14</b>                                 | <b>14</b>   | <b>28</b>                   | <b>42</b>   | <b>0</b>     |             |          |          |
| Cadmium             | Transport      | CadA                         | Cadmium ATPase                                                           | 101                                       | 903         | 1004                        | 2150        | 0            |             |          |          |
|                     |                | CadBD                        | Cadmium resistance protein                                               | 34                                        | 108         | 122                         | 295         | 0            |             |          |          |
|                     |                |                              | <b>Cadmium Total</b>                                                     | <b>135</b>                                | <b>1011</b> | <b>1146</b>                 | <b>2445</b> | <b>0</b>     |             |          |          |
| Cadmium,Cobalt,Zinc | Transport      | CzcA                         | Heavy metal efflux pump, CzcA family                                     | 39                                        | 475         | 514                         | 1016        | 0            |             |          |          |
|                     |                | CzcC                         | Cation efflux system membrane protein czcC                               | 11                                        | 78          | 89                          | 178         | 0            |             |          |          |
|                     |                | CzcD                         | Cobalt-zinc-cadmium resistance protein czcD                              | 87                                        | 541         | 628                         | 1209        | 0            |             |          |          |
|                     |                |                              |                                                                          | <b>Cadmium, Cobalt, Zinc Total</b>        | <b>137</b>  | <b>1094</b>                 | <b>1231</b> | <b>2403</b>  | <b>0</b>    |          |          |
| Calcium             | Transport      | Ca_vacuolar_exchanger        | Vacuolar calcium ion transporter                                         | 34                                        | 18          | 52                          | 63          | 0            |             |          |          |
|                     |                | ChaA                         | Sodium/calcium exchanger membrane region                                 | 8                                         | 117         | 125                         | 261         | 0            |             |          |          |
|                     |                |                              | <b>Calcium Total</b>                                                     | <b>42</b>                                 | <b>135</b>  | <b>177</b>                  | <b>324</b>  | <b>0</b>     |             |          |          |
| Chromium            | Detoxification | Chr                          | Putative NADPH-dependent FMN reductase                                   | 7                                         | 31          | 38                          | 84          | 58           |             |          |          |
|                     |                |                              |                                                                          | <b>Chromium Detoxification Total</b>      | <b>7</b>    | <b>31</b>                   | <b>38</b>   | <b>84</b>    | <b>58</b>   |          |          |
|                     | Transport      | ChrA                         | Chromate reductase                                                       | 244                                       | 1592        | 1836                        | 3839        | 0            |             |          |          |
|                     |                |                              | <b>Chromium Transport Total</b>                                          | <b>244</b>                                | <b>1592</b> | <b>1836</b>                 | <b>3839</b> | <b>0</b>     |             |          |          |
|                     |                |                              | <b>Chromium Total</b>                                                    | <b>251</b>                                | <b>1623</b> | <b>1874</b>                 | <b>3923</b> | <b>58</b>    |             |          |          |
| Cobalt              | Transport      | CorC                         | Hypothetical 33.3 kDa protein                                            | 22                                        | 205         | 227                         | 491         | 0            |             |          |          |
|                     |                |                              | <b>Cobalt Total</b>                                                      | <b>22</b>                                 | <b>205</b>  | <b>227</b>                  | <b>491</b>  | <b>0</b>     |             |          |          |
| Cobalt,Nickel       | Transport      | CnrA                         | Heavy metal efflux pump, CzcA family                                     | 1                                         | 21          | 22                          | 49          | 0            |             |          |          |
|                     |                | CnrC                         | Putative nickel and cobalt resistance protein                            | 1                                         | 4           | 5                           | 15          | 0            |             |          |          |
|                     |                | RcnA                         | Nickel/cobalt efflux protein RcnA                                        | 9                                         | 19          | 28                          | 59          | 0            |             |          |          |
|                     |                |                              | <b>Cobalt, Nickel Total</b>                                              | <b>11</b>                                 | <b>44</b>   | <b>55</b>                   | <b>123</b>  | <b>0</b>     |             |          |          |
| Cobalt/Magnesium    | Transport      | CorA                         | Cobalt/Magnesium efflux protein CorC                                     | 181                                       | 1584        | 1765                        | 3811        | 0            |             |          |          |
|                     |                |                              | <b>Cobalt/Magnesium Total</b>                                            | <b>181</b>                                | <b>1584</b> | <b>1765</b>                 | <b>3811</b> | <b>0</b>     |             |          |          |
| Copper              | Detoxification | Cueo                         | Multicopper oxidase family protein                                       | 5                                         | 57          | 62                          | 130         | 57           |             |          |          |
|                     |                | Pcoa                         | Copper resistance protein A                                              | 2                                         | 14          | 16                          | 32          | 0            |             |          |          |
|                     |                |                              |                                                                          | <b>Copper Detoxification Total</b>        | <b>7</b>    | <b>71</b>                   | <b>78</b>   | <b>162</b>   | <b>57</b>   |          |          |
|                     | Transport      | CopA                         | Copper-exporting ATPase                                                  | 123                                       | 1249        | 1372                        | 2966        | 0            |             |          |          |
|                     |                | CusA                         | Outer membrane copper (silver) and drug transport protein (RND family)   | 4                                         | 26          | 30                          | 63          | 0            |             |          |          |
|                     |                | CusC                         | Cation efflux system protein cusC                                        | 0                                         | 6           | 6                           | 12          | 0            |             |          |          |
|                     |                | CusF                         | Cation efflux system protein cusF                                        | 26                                        | 204         | 230                         | 463         | 0            |             |          |          |
|                     |                | CusA                         | Divalent cation tolerance protein                                        | 18                                        | 415         | 433                         | 906         | 0            |             |          |          |
|                     |                | PcoC                         | Copper resistance protein C                                              | 0                                         | 1           | 1                           | 2           | 0            |             |          |          |
|                     |                | PcoE                         | Putative copper-binding protein PcoE                                     | 0                                         | 2           | 2                           | 4           | 0            |             |          |          |
|                     |                | YcnJ                         | Copper transport protein YcnJ                                            | 2                                         | 7           | 9                           | 24          | 0            |             |          |          |
|                     |                |                              |                                                                          | <b>Copper Transport Total</b>             | <b>173</b>  | <b>1910</b>                 | <b>2083</b> | <b>4440</b>  | <b>0</b>    |          |          |
|                     |                |                              |                                                                          | <b>Copper Total</b>                       | <b>180</b>  | <b>1981</b>                 | <b>2161</b> | <b>4602</b>  | <b>57</b>   |          |          |
|                     |                | Iron                         | Oxidation                                                                | Rusticyanin                               | Rusticyanin | 0                           | 1           | 1            | 2           | 0        |          |
|                     |                |                              |                                                                          |                                           |             | <b>Iron Oxidation Total</b> | <b>0</b>    | <b>1</b>     | <b>1</b>    | <b>2</b> | <b>0</b> |
| Storage             | Bfr            |                              | bacterioferritin                                                         | 34                                        | 360         | 394                         | 810         | 0            |             |          |          |
|                     | Dps            |                              | DNA-binding ferritin-like protein                                        | 39                                        | 859         | 898                         | 2032        | 0            |             |          |          |
|                     |                |                              | <b>Iron Storage Total</b>                                                | <b>73</b>                                 | <b>1219</b> | <b>1292</b>                 | <b>2842</b> | <b>0</b>     |             |          |          |
| Transport           | CirA           |                              | Colicin I receptor                                                       | 187                                       | 1449        | 1636                        | 3470        | 0            |             |          |          |
|                     | EntB           |                              | 2,3-dihydroxybenzoate-AMP ligase                                         | 1                                         | 29          | 30                          | 59          | 0            |             |          |          |
|                     | FecA           |                              | Dicltrate transport protein                                              | 30                                        | 258         | 288                         | 597         | 0            |             |          |          |
|                     | FeoB           |                              | Ferrous iron transport protein B                                         | 126                                       | 1504        | 1630                        | 3707        | 0            |             |          |          |
|                     | FepA_iron      |                              | Ferric enterobactin protein receptor                                     | 80                                        | 714         | 794                         | 1663        | 0            |             |          |          |
|                     | FhuA           |                              | Putative ferrichrome-iron receptor FhuA                                  | 17                                        | 81          | 98                          | 212         | 0            |             |          |          |
|                     | FhuE           |                              | Ferric- $\rho$ -thiostolic acid outer membrane transporter               | 57                                        | 356         | 413                         | 862         | 0            |             |          |          |
|                     | Fiu            |                              | Catecholate siderophore receptor                                         | 30                                        | 270         | 300                         | 603         | 0            |             |          |          |
|                     |                |                              |                                                                          | <b>Iron Transport Total</b>               | <b>528</b>  | <b>4661</b>                 | <b>5189</b> | <b>11173</b> | <b>0</b>    |          |          |
|                     |                |                              |                                                                          | <b>Iron Total</b>                         | <b>601</b>  | <b>5881</b>                 | <b>6482</b> | <b>14017</b> | <b>0</b>    |          |          |
| Lead                | Transport      | PbrA                         | Heavy metal translocating P-type ATPase                                  | 8                                         | 32          | 40                          | 75          | 0            |             |          |          |
|                     |                | PbrD                         | Lead binding protein                                                     | 0                                         | 1           | 1                           | 4           | 0            |             |          |          |
|                     |                | PbrT                         | Lead uptake protein                                                      | 2                                         | 11          | 13                          | 33          | 0            |             |          |          |
|                     |                | <b>Lead Total</b>            | <b>10</b>                                                                | <b>44</b>                                 | <b>54</b>   | <b>112</b>                  | <b>0</b>    |              |             |          |          |
| Magnesium           | Transport      | MgtA                         | Magnesium-translocating P-type ATPase                                    | 189                                       | 1769        | 1958                        | 5012        | 0            |             |          |          |
|                     |                | MgtC                         | Mg <sup>2+</sup> transport P-type ATPase C                               | 1                                         | 5           | 6                           | 13          | 0            |             |          |          |
|                     |                | MgtE                         | Magnesium (Mg <sup>2+</sup> ) transporter-like protein                   | 144                                       | 1401        | 1545                        | 3378        | 0            |             |          |          |
|                     |                |                              |                                                                          | <b>Magnesium Total</b>                    | <b>334</b>  | <b>3175</b>                 | <b>3509</b> | <b>8403</b>  | <b>0</b>    |          |          |
| Manganese           | Transport      | MntH_Nramp                   | NRAMP family Mn <sup>2+</sup> /Fe <sup>2+</sup> transporter              | 138                                       | 934         | 1072                        | 2330        | 0            |             |          |          |
|                     |                | PisA_50_Mn                   | Manganese ABC transporter substrate-binding lipoprotein                  | 30                                        | 261         | 291                         | 607         | 0            |             |          |          |
|                     |                | <b>Manganese Total</b>       | <b>168</b>                                                               | <b>1195</b>                               | <b>1363</b> | <b>2937</b>                 | <b>0</b>    |              |             |          |          |
| Mercury             | Detoxification | Mer                          | Pyridine mercuric reductase                                              | 83                                        | 603         | 686                         | 1999        | 728          |             |          |          |
|                     |                | MerB                         | Alkylmercury lyase                                                       | 12                                        | 55          | 67                          | 133         | 86           |             |          |          |
|                     |                | MerC                         | Putative mercury transport protein MerC                                  | 3                                         | 15          | 18                          | 70          | 24           |             |          |          |
|                     |                |                              | <b>Mercury Detoxification Total</b>                                      | <b>98</b>                                 | <b>673</b>  | <b>771</b>                  | <b>2202</b> | <b>838</b>   |             |          |          |
|                     | Transport      | MerE                         | Mercuric transport protein                                               | 5                                         | 3           | 8                           | 17          | 0            |             |          |          |
|                     |                | MerF                         | Mercury ion transport protein                                            | 4                                         | 21          | 25                          | 59          | 0            |             |          |          |
|                     |                | MerG                         | Organomercury resistance protein                                         | 1                                         | 2           | 3                           | 2           | 0            |             |          |          |
|                     |                | MerH                         | Mercuric transporter MerH                                                | 0                                         | 1           | 1                           | 2           | 0            |             |          |          |
|                     |                | MerP                         | Heavy metal translocating P-type ATPase                                  | 17                                        | 101         | 118                         | 243         | 0            |             |          |          |
|                     |                | MerT                         | Mercuric transport protein MerT                                          | 23                                        | 112         | 135                         | 306         | 0            |             |          |          |
|                     |                |                              | <b>Mercury Transport Total</b>                                           | <b>50</b>                                 | <b>239</b>  | <b>289</b>                  | <b>630</b>  | <b>2</b>     |             |          |          |
|                     |                | <b>Mercury Total</b>         | <b>148</b>                                                               | <b>912</b>                                | <b>1060</b> | <b>2832</b>                 | <b>840</b>  |              |             |          |          |
| Multiple metals     | Storage        | SmtA                         | Metallothionein                                                          | 3                                         | 31          | 34                          | 122         | 0            |             |          |          |
|                     |                |                              |                                                                          | <b>Multiple Metals Storage Total</b>      | <b>3</b>    | <b>31</b>                   | <b>34</b>   | <b>122</b>   | <b>0</b>    |          |          |
|                     | Transport      | RndA                         | Cation efflux system protein                                             | 158                                       | 1146        | 1304                        | 2671        | 0            |             |          |          |
|                     |                | <b>Multiple metals Total</b> | <b>161</b>                                                               | <b>1177</b>                               | <b>1338</b> | <b>2793</b>                 | <b>0</b>    |              |             |          |          |
| Nickel              | Transport      | NiCoT                        | High-affinity nickel-transport protein                                   | 75                                        | 246         | 321                         | 609         | 0            |             |          |          |
|                     |                | NiKa                         | Periplasmic nickel-binding protein                                       | 447                                       | 2374        | 2821                        | 5624        | 0            |             |          |          |
|                     |                | NiKc                         | Nickel transport system permease protein NiKc                            | 7                                         | 28          | 35                          | 68          | 0            |             |          |          |
|                     |                | NreB                         | Nickel resistance protein/MFS family nickel efflux transporter protein B | 7                                         | 88          | 75                          | 110         | 0            |             |          |          |
|                     |                |                              |                                                                          | <b>Nickel Total</b>                       | <b>536</b>  | <b>2716</b>                 | <b>3252</b> | <b>6411</b>  | <b>0</b>    |          |          |
| Potassium           | Transport      | KdpA                         | Potassium ion P-type ATPase transporter                                  | 54                                        | 474         | 528                         | 1119        | 0            |             |          |          |
|                     |                | KefBC                        | Glutathione-regulated potassium-efflux system protein                    | 67                                        | 531         | 598                         | 1224        | 0            |             |          |          |
|                     |                | KtrBD                        | Trk-type potassium uptake protein KtrB                                   | 8                                         | 133         | 141                         | 291         | 0            |             |          |          |
|                     |                | Kup                          | Low affinity potassium transport system protein Kup                      | 33                                        | 243         | 276                         | 560         | 0            |             |          |          |
|                     |                | TrkA                         | Potassium transporter peripheral membrane component                      | 97                                        | 1102        | 1199                        | 2480        | 0            |             |          |          |
|                     |                | TrkGH                        | H(+)-transporting two-sector ATPase                                      | 105                                       | 1342        | 1447                        | 3290        | 0            |             |          |          |
|                     |                |                              |                                                                          | <b>Potassium Total</b>                    | <b>364</b>  | <b>3825</b>                 | <b>4189</b> | <b>8964</b>  | <b>0</b>    |          |          |
| Selenium            | Detoxification | Se                           | Selenate reductase subunit alpha (Selenatereductase molybdenum subunit)  | 2                                         | 2           | 4                           | 6           | 0            |             |          |          |
|                     |                | <b>Selenium Total</b>        | <b>2</b>                                                                 | <b>2</b>                                  | <b>4</b>    | <b>6</b>                    | <b>0</b>    |              |             |          |          |

|                                         |                                                                                                  |                                 |                                                                        |                               |                                                                                              |             |                    |              |              |             |
|-----------------------------------------|--------------------------------------------------------------------------------------------------|---------------------------------|------------------------------------------------------------------------|-------------------------------|----------------------------------------------------------------------------------------------|-------------|--------------------|--------------|--------------|-------------|
| Silver                                  | Transport                                                                                        | SilA                            | Putative cation efflux system protein SilA                             | 22                            | 91                                                                                           | 113         | 209                | 0            |              |             |
|                                         |                                                                                                  | SilC                            | Outer membrane lipoprotein SilC                                        | 38                            | 293                                                                                          | 331         | 704                | 0            |              |             |
|                                         |                                                                                                  | SilE                            | Silver-binding protein SilE                                            | 0                             | 1                                                                                            | 1           | 0                  | 0            |              |             |
|                                         |                                                                                                  | SilP                            | Silver efflux system P-type ATPase                                     | 166                           | 530                                                                                          | 696         | 1304               | 0            |              |             |
|                                         |                                                                                                  | <b>Silver Total</b>             |                                                                        |                               | <b>227</b>                                                                                   | <b>914</b>  | <b>1141</b>        | <b>2218</b>  | <b>0</b>     |             |
| Sodium                                  | Transport                                                                                        | MrpA                            | Na(+)/H(+) antiporter subunit A                                        | 71                            | 244                                                                                          | 315         | 588                | 0            |              |             |
|                                         |                                                                                                  | NatB                            | ABC transporter sodium permease                                        | 31                            | 383                                                                                          | 414         | 866                | 0            |              |             |
|                                         |                                                                                                  | NhaA                            | Sodium/proton antiporter nhaA                                          | 55                            | 607                                                                                          | 662         | 1405               | 0            |              |             |
|                                         |                                                                                                  | NhaB                            | Sodium/proton antiporter nhaB                                          | 17                            | 123                                                                                          | 140         | 280                | 0            |              |             |
|                                         |                                                                                                  | NhaC                            | Sodium/proton antiporter nhaC                                          | 129                           | 0                                                                                            | 129         | 0                  | 0            |              |             |
|                                         |                                                                                                  | NhaD                            | Sodium/proton antiporter nhaD                                          | 31                            | 245                                                                                          | 276         | 561                | 0            |              |             |
|                                         |                                                                                                  | NhaP                            | Sodium/proton antiporter nhaP                                          | 234                           | 1317                                                                                         | 1551        | 3349               | 0            |              |             |
|                                         |                                                                                                  | NqrB                            | Na(+)-translocating NADH-quinone reductase subunit B                   | 34                            | 258                                                                                          | 292         | 594                | 0            |              |             |
|                                         |                                                                                                  | <b>Sodium Total</b>             |                                                                        |                               | <b>602</b>                                                                                   | <b>3177</b> | <b>3779</b>        | <b>7772</b>  | <b>0</b>     |             |
|                                         |                                                                                                  | Tellurium                       | Detoxification                                                         | TehB                          | Tellurite resistance protein TehB                                                            | 28          | 352                | 380          | 7435         | 339         |
| TerC                                    | Tellurium resistance protein terC                                                                |                                 |                                                                        | 60                            | 890                                                                                          | 950         | 3749               | 1081         |              |             |
| Transport                               | TerD                                                                                             |                                 | Tellurium resistance protein terD                                      | 51                            | 171                                                                                          | 222         | 416                | 0            |              |             |
|                                         | TerZ                                                                                             |                                 | Tellurium resistance protein terZ                                      | 10                            | 144                                                                                          | 154         | 306                | 0            |              |             |
|                                         | TerZD                                                                                            |                                 | Tellurium resistance protein                                           | 86                            | 660                                                                                          | 746         | 1599               | 0            |              |             |
|                                         | <b>Tellurium Total</b>                                                                           |                                 |                                                                        |                               | <b>247</b>                                                                                   | <b>975</b>  | <b>1122</b>        | <b>2322</b>  | <b>0</b>     |             |
|                                         | <b>Tellurium Detoxification Total</b>                                                            |                                 |                                                                        |                               | <b>88</b>                                                                                    | <b>1242</b> | <b>1330</b>        | <b>5184</b>  | <b>1420</b>  |             |
|                                         | <b>Tellurium Transport Total</b>                                                                 |                                 |                                                                        |                               | <b>159</b>                                                                                   | <b>833</b>  | <b>926</b>         | <b>1916</b>  | <b>0</b>     |             |
| Zinc                                    | Transport                                                                                        |                                 | AdcA                                                                   | Zinc-binding lipoprotein AdcA | 6                                                                                            | 68          | 74                 | 152          | 0            |             |
|                                         |                                                                                                  |                                 | Cot1                                                                   | Metal cation transporter      | 6                                                                                            | 7           | 13                 | 24           | 0            |             |
|                                         |                                                                                                  | Msc2                            | Metal cation transporter                                               | 6                             | 13                                                                                           | 19          | 31                 | 0            |              |             |
|                                         |                                                                                                  | TroA                            | Zinc ABC transporter_periplasmic zinc-binding protein                  | 1                             | 17                                                                                           | 18          | 38                 | 0            |              |             |
|                                         |                                                                                                  | Hip_fieF                        | Cation-efflux pump FieF                                                | 12                            | 72                                                                                           | 84          | 164                | 0            |              |             |
|                                         |                                                                                                  | ZitB                            | Cation diffusion facilitator family transporter                        | 16                            | 128                                                                                          | 144         | 284                | 0            |              |             |
|                                         |                                                                                                  | ZntA                            | Heavy metal translocating P-type ATPase                                | 88                            | 415                                                                                          | 503         | 1254               | 0            |              |             |
|                                         |                                                                                                  | ZnuA                            | High-affinity zinc transporter periplasmic component                   | 33                            | 261                                                                                          | 294         | 633                | 0            |              |             |
|                                         |                                                                                                  | ZnuC                            | Zinc import ATP-binding protein ZnuC                                   | 119                           | 1270                                                                                         | 1389        | 3093               | 0            |              |             |
|                                         |                                                                                                  | Zrc1                            | Zinc/cadmium resistance protein                                        | 7                             | 6                                                                                            | 13          | 19                 | 0            |              |             |
|                                         |                                                                                                  | Zrt1                            | Zinc-regulated transporter 1/High-affinity zinc transport protein zrt1 | 29                            | 23                                                                                           | 52          | 73                 | 0            |              |             |
|                                         |                                                                                                  | Zrt2                            | Zinc-regulated transporter 2/Low-affinity zinc transport protein zrt2  | 24                            | 20                                                                                           | 44          | 65                 | 0            |              |             |
|                                         |                                                                                                  | Zrt3                            | Zinc-regulated transporter 3/Vacuolar membrane zinc transporter        | 7                             | 8                                                                                            | 15          | 23                 | 0            |              |             |
|                                         |                                                                                                  | ZupT_yjiE                       | Zinc transporter ZupT                                                  | 15                            | 83                                                                                           | 98          | 228                | 0            |              |             |
|                                         |                                                                                                  | <b>Zinc Total</b>               |                                                                        |                               | <b>369</b>                                                                                   | <b>2391</b> | <b>2760</b>        | <b>6081</b>  | <b>0</b>     |             |
|                                         |                                                                                                  | <b>Metal Homeostasis Total</b>  |                                                                        |                               |                                                                                              | <b>3084</b> | <b>37543</b>       | <b>42627</b> | <b>94470</b> | <b>3939</b> |
|                                         |                                                                                                  | Organic Contaminant Degradation | Aromatics                                                              | Aromatic alpha hydroxy acid   |                                                                                              | Mda         | Mandelate racemase | 40           | 206          | 246         |
| Aromatic carboxylic acid                |                                                                                                  |                                 |                                                                        | badi                          | 2-Ketocyclohexane-1-carboxyl-CoA hydrolase                                                   | 2           | 2                  | 28           | 13           |             |
| badi                                    | Cyclohex-1-ene-1-carboxyl-CoA hydratase                                                          |                                 |                                                                        | 0                             | 3                                                                                            | 7           | 3                  |              |              |             |
| Bco                                     | Benzoyl-CoA reductase, subunit A                                                                 |                                 |                                                                        | 22                            | 54                                                                                           | 76          | 160                | 23           |              |             |
| bend                                    | Cis-diol dehydrogenase                                                                           |                                 |                                                                        |                               |                                                                                              |             |                    | 65           |              |             |
| Bph                                     | Benzate 4-monooxygenase cytochrome P450, putative                                                |                                 |                                                                        | 83                            | 37                                                                                           | 120         | 133                | 33           |              |             |
| Hcaacd                                  | 3-phenylpropionate dioxygenase alpha subunit (dioxigenin alph subunit)                           |                                 |                                                                        | 2                             | 10                                                                                           | 12          | 37                 | 14           |              |             |
| hcab                                    | 2,3-Dihydroxy-2,3-dihydro-phenylpropionate dehydrogenase                                         |                                 |                                                                        |                               |                                                                                              |             |                    | 39           |              |             |
| mdib                                    | L-mandelate dehydrogenase                                                                        |                                 |                                                                        |                               |                                                                                              |             |                    | 36           |              |             |
| mdic                                    | Benzoylformate decarboxylase                                                                     |                                 |                                                                        |                               |                                                                                              |             |                    | 196          |              |             |
| Mhpa                                    | 3-(3-hydroxy-phenyl)propionate hydroxylase                                                       |                                 |                                                                        | 36                            | 29                                                                                           | 65          | 92                 | 73           |              |             |
| mhpab                                   | 3-(2,3-dihydroxyphenyl)propionate 1,2-dioxygenase                                                |                                 |                                                                        |                               |                                                                                              |             |                    | 41           |              |             |
| mhpc                                    | 2-hydroxy-6-ketono-2,4-dienedolic acid hydrolase                                                 |                                 |                                                                        |                               |                                                                                              |             |                    | 20           |              |             |
| Nagg                                    | Putative Salicylate 1-monooxygenase                                                              |                                 |                                                                        | 196                           | 261                                                                                          | 457         | 778                | 148          |              |             |
| Ophc                                    | 4,5-dihydroxyphthalate decarboxylase                                                             |                                 |                                                                        | 1                             | 30                                                                                           | 31          | 77                 | 32           |              |             |
| Phta                                    | Phthalate 4,5-dioxygenase                                                                        |                                 |                                                                        | 19                            | 92                                                                                           | 111         | 222                | 24           |              |             |
| pHtb                                    | Phthalate 4,5-cis-dihydrodiol dehydrogenase                                                      |                                 |                                                                        |                               |                                                                                              |             |                    | 8            |              |             |
| Poba                                    | 4-Hydroxybenzoate 3-monooxygenase                                                                |                                 |                                                                        | 0                             | 4                                                                                            | 9           | 9                  | 4            |              |             |
| poamo                                   | Phenoxybenzoate dioxygenase                                                                      |                                 |                                                                        | 27                            | 272                                                                                          | 299         | 917                | 30           |              |             |
| thl                                     | Pyrogallol hydroxytransferase                                                                    |                                 |                                                                        | 2                             | 6                                                                                            | 14          | 8                  |              |              |             |
| Tpha                                    | Putative terephthalate 1,2-dioxygenase, large subunit                                            |                                 |                                                                        | 1                             | 7                                                                                            | 8           | 15                 | 9            |              |             |
| tphb                                    | Terphthalate dihydrodiol dehydrogenase                                                           |                                 |                                                                        |                               |                                                                                              |             |                    | 147          |              |             |
| xylg                                    | 2-Hydroxymuconic semialdehyde dehydrogenase                                                      |                                 |                                                                        |                               |                                                                                              |             |                    | 3            |              |             |
| xyll                                    | 2-Hydroxy-1,2-dihydroxybenzoate dehydrogenase                                                    |                                 |                                                                        | 8                             | 23                                                                                           | 31          | 61                 | 31           |              |             |
| Xlyky                                   | Toluate 1,2-dioxygenase subunit alpha                                                            |                                 |                                                                        | 1                             | 10                                                                                           | 11          | 25                 | 14           |              |             |
| <b>Aromatic carboxylic acid Total</b>   |                                                                                                  |                                 |                                                                        | <b>400</b>                    | <b>849</b>                                                                                   | <b>1221</b> | <b>2575</b>        | <b>1304</b>  |              |             |
| <b>BTEX and related aromatics</b>       |                                                                                                  |                                 |                                                                        | Apc                           | Related to beta-subunit of acetone carboxylase, possible subunit of acetophenone carboxylase | 0           | 16                 | 16           | 32           | 3           |
| Bbs                                     | Putative E-phenylitaconyl-CoA hydratase                                                          |                                 |                                                                        | 1                             | 5                                                                                            | 6           | 10                 | 5            |              |             |
| bbsg                                    | Benzylsuccinyl CoA dehydrogenase                                                                 |                                 |                                                                        | 1                             | 4                                                                                            | 8           | 5                  |              |              |             |
| Catb                                    | Mucronate cyclisomerase                                                                          |                                 |                                                                        | 34                            | 211                                                                                          | 245         | 538                | 154          |              |             |
| EbdA                                    | Ethylbenzene dehydrogenase, beta subunit                                                         |                                 |                                                                        | 0                             | 2                                                                                            | 2           | 4                  | 0            |              |             |
| Ebdabc                                  | Ethylbenzene dehydrogenase, beta subunit                                                         |                                 |                                                                        | 0                             | 5                                                                                            | 5           | 13                 | 3            |              |             |
| Hbh                                     | 4-Hydroxybenzoate hydroxylase                                                                    |                                 |                                                                        | 18                            | 69                                                                                           | 87          | 522                | 87           |              |             |
| Pchcf                                   | 4-Cresol dehydrogenase                                                                           |                                 |                                                                        | 6                             | 31                                                                                           | 37          | 75                 | 34           |              |             |
| Tmncbe                                  | Toluene-4-monooxygenase system protein A                                                         |                                 |                                                                        | 1                             | 13                                                                                           | 14          | 27                 | 14           |              |             |
| Toma                                    | Toluene 2-monooxygenase                                                                          |                                 |                                                                        | 2                             | 10                                                                                           | 12          | 22                 | 8            |              |             |
| Tutfdg                                  | Benzylsuccinate synthase                                                                         |                                 |                                                                        | 25                            | 146                                                                                          | 171         | 389                | 40           |              |             |
| xyk                                     | Benzaldehyde dehydrogenase                                                                       |                                 |                                                                        |                               |                                                                                              |             |                    | 71           |              |             |
| xyj                                     | 2-Oxopent-4-enoate hydratase                                                                     |                                 |                                                                        |                               |                                                                                              |             |                    | 149          |              |             |
| Xylm                                    | Xylene monooxygenase subunit 1                                                                   |                                 |                                                                        | 3                             | 3                                                                                            | 6           | 11                 | 7            |              |             |
| <b>BTEX and related aromatics Total</b> |                                                                                                  |                                 |                                                                        | <b>91</b>                     | <b>515</b>                                                                                   | <b>601</b>  | <b>1651</b>        | <b>580</b>   |              |             |
| <b>Chlorinated aromatics</b>            |                                                                                                  |                                 |                                                                        | Cbaa                          | 3-Chlorobenzoate-3,4-dioxygenase oxygenase subunit                                           | 1           | 3                  | 4            | 7            | 4           |
| Cbea                                    | Achlorobenzoate 1,2-dioxygenase subunit alpha                                                    |                                 |                                                                        | 1                             | 3                                                                                            | 4           | 7                  | 4            |              |             |
| Fcba                                    | 4-Chlorobenzoyl CoA ligase                                                                       |                                 |                                                                        | 2                             | 9                                                                                            | 11          | 24                 | 12           |              |             |
| fcbc                                    | 4-Hydroxybenzoyl CoA thioesterase                                                                |                                 |                                                                        | 1                             | 1                                                                                            | 1           | 6                  | 2            |              |             |
| fcbb                                    | 4-Chlorobenzoyl-CoA dehalogenase                                                                 |                                 |                                                                        | 1                             | 2                                                                                            | 1           | 10                 | 3            |              |             |
| Tfda                                    | 2,4-Dichloro-ketoglutarate dioxygenase                                                           |                                 |                                                                        | 100                           | 305                                                                                          | 405         | 803                | 104          |              |             |
| Tfdb                                    | 2,4-Dichlorophenol 6-monooxygenase                                                               |                                 |                                                                        | 16                            | 35                                                                                           | 51          | 108                | 52           |              |             |
| Tfta                                    | 2,4,5-Trichlorophenoxyacetic acid oxygenase                                                      |                                 |                                                                        | 1                             | 0                                                                                            | 1           | 1                  | 1            |              |             |
| Tfth                                    | Hydroxyquinol 1,2-dioxygenase                                                                    |                                 |                                                                        | 36                            | 117                                                                                          | 153         | 285                | 90           |              |             |
| <b>Chlorinated aromatics Total</b>      |                                                                                                  |                                 |                                                                        | <b>159</b>                    | <b>475</b>                                                                                   | <b>629</b>  | <b>1251</b>        | <b>352</b>   |              |             |
| <b>Heterocyclic aromatics</b>           |                                                                                                  |                                 |                                                                        | cara                          | Carbazole 1,9a-dioxygenase                                                                   | 3           | 16                 | 62           | 19           |             |
| dbdc                                    | Dibenzothioephene dioxygenase                                                                    |                                 |                                                                        | 1                             | 1                                                                                            | 2           | 2                  |              |              |             |
| dbdd                                    | Dibenzothioephene dihydrodiol dehydrogenase                                                      |                                 |                                                                        | 2                             | 3                                                                                            | 7           | 5                  |              |              |             |
| DbfB                                    | 2,2,3-Trihydroxy-biphenyl dioxygenase                                                            |                                 |                                                                        | 1                             | 0                                                                                            | 1           | 1                  | 0            |              |             |
| DbtAc                                   | Dibenzothioephene dioxygenase                                                                    |                                 |                                                                        | 1                             | 0                                                                                            | 1           | 1                  | 0            |              |             |
| Dzma                                    | Alpha subunit of dibenzofuran dioxygenase                                                        |                                 |                                                                        | 7                             | 1                                                                                            | 8           | 21                 | 13           |              |             |
| Hdmo                                    | 6-Hydroxy-D-nicotine oxidase                                                                     |                                 |                                                                        | 7                             | 4                                                                                            | 11          | 16                 | 4            |              |             |
| nbzc                                    | Nicotine dehydrogenase chain A                                                                   |                                 |                                                                        | 0                             | 19                                                                                           | 19          | 42                 | 8            |              |             |
| <b>Heterocyclic aromatics Total</b>     |                                                                                                  |                                 |                                                                        | <b>22</b>                     | <b>44</b>                                                                                    | <b>40</b>   | <b>152</b>         | <b>51</b>    |              |             |
| <b>Nitroaromatics</b>                   |                                                                                                  |                                 |                                                                        | mhaq                          | Hydroquinone 1,2-dioxygenase                                                                 |             |                    |              | 4            |             |
| Nbac                                    | 3-Hydroxyanthranilate 3,4-dioxygenase                                                            |                                 |                                                                        | 17                            | 88                                                                                           | 105         | 225                | 98           |              |             |
| Nbaa                                    | Nitrobenzene nitroreductase                                                                      |                                 |                                                                        | 1                             | 0                                                                                            | 1           | 1                  | 1            |              |             |
| nbzb                                    | Hydroxyaminobenzenes mutase                                                                      |                                 |                                                                        | 0                             | 6                                                                                            | 6           | 100                | 6            |              |             |
| nbzc                                    | 2-Aminophenol 1,6-dioxygenase                                                                    |                                 |                                                                        | 1                             | 3                                                                                            | 9           | 9                  | 4            |              |             |
| Nfsa_2                                  | Oxygen-insensitive NAD(P)H nitroreductase                                                        |                                 |                                                                        | 43                            | 430                                                                                          | 473         | 1818               | 121          |              |             |
| Nfsb_2                                  | Oxygen-insensitive NAD(P)H nitroreductase/Dihydropyridine reductase/FMN-dependent nitroreductase |                                 |                                                                        | 51                            | 439                                                                                          | 490         | 1162               | 55           |              |             |
| Nhh                                     | Nitrile hydratase                                                                                |                                 |                                                                        | 34                            | 186                                                                                          | 220         | 593                | 148          |              |             |
| Nitroreductase_1                        | Nitroreductase                                                                                   |                                 |                                                                        | 51                            | 554                                                                                          | 605         | 1360               | 0            |              |             |

|  |                                                    |                                                                                    |      |      |      |       |      |
|--|----------------------------------------------------|------------------------------------------------------------------------------------|------|------|------|-------|------|
|  | Nitroreductase_b                                   | Nitroreductase                                                                     | 42   | 174  | 216  | 454   | 0    |
|  | Npha                                               | Nitrophenol monooxygenase                                                          | 1    | 0    | 1    | 1     | 2    |
|  | Oxdb                                               | Phenylacetaldoxime dehydratase                                                     | 8    | 46   | 54   | 108   | 56   |
|  |                                                    |                                                                                    | 249  | 1926 | 2165 | 5831  | 495  |
|  | <b>Other aromatics</b>                             |                                                                                    | 7    | 68   | 75   | 185   | 88   |
|  | Amie                                               | Aliphatic amidase                                                                  | 41   | 373  | 414  | 1254  | 355  |
|  | Arylest                                            | Arylesterase                                                                       | 89   | 199  | 288  | 638   | 308  |
|  | Badh                                               | Benzylalcohol dehydrogenase                                                        | 85   | 292  | 377  | 945   | 235  |
|  | Catechol_b                                         | Catechol 1,2-dioxygenase                                                           | 37   | 155  | 192  | 548   | 232  |
|  | Catechol_b                                         | Catechol 2,3-dioxygenase                                                           | 4    | 10   | 14   | 24    | 0    |
|  | Cdb                                                | 2-Hydroxy-3-carboxy-6-oxo-7-methylocta-2,4-dienoate decarboxylase                  | 1    | 2    | 3    | 5     | 3    |
|  | Cdo                                                | 2,3-Dihydroxy-p-cumate dioxygenase                                                 | 36   | 139  | 175  | 440   | 191  |
|  | Cmci                                               | 3-Carboxy-cis-cis-muconate cyclisomerase                                           | 1    | 6    | 7    | 16    | 7    |
|  | Cmtab                                              | p-Cumate dioxygenase large subunit (CmtAb)                                         | 1    | 1    | 1    | 3     | 2    |
|  | cumb                                               | Dihydroxyisopropylbenzene dehydrogenase                                            | 1    | 3    | 4    | 11    | 4    |
|  | cumc                                               | 3-Isopropylcatechol 2,3-dioxygenase                                                | 1    | 2    | 3    | 5     | 3    |
|  | cumd                                               | 2-Hydroxy-6-oxohepta-2,4-dienoate hydrolase                                        | 2    | 6    | 8    | 15    | 8    |
|  | cyma                                               | p-Cymene methyl hydroxylase                                                        | 1    | 4    | 5    | 9     | 5    |
|  | cymc                                               | Aryl-aldehyde dehydrogenase                                                        | 5    | 32   | 37   | 122   | 37   |
|  | mdld                                               | Benzaldehyde dehydrogenase (NAD(+))                                                | 97   | 190  | 287  | 977   | 206  |
|  | Multi_ring_12DiOx                                  | Multi-ring 1,2-Dioxygenase                                                         | 66   | 256  | 322  | 705   | 207  |
|  | Nitrilase                                          | Nitrilase                                                                          | 37   | 143  | 180  | 522   | 148  |
|  | One_ring_12Diox                                    | One-ring 1,2-Dioxygenase                                                           | 92   | 215  | 307  | 1019  | 313  |
|  | One_ring_23Diox                                    | One-ring 2,3-Dioxygenase                                                           | 53   | 255  | 308  | 746   | 210  |
|  | Pcag                                               | Protocatechuate 3,4-dioxygenase, beta subunit                                      | 20   | 90   | 110  | 269   | 69   |
|  | ProO                                               | Protocatechuate 4,5-dioxygenase                                                    | 6    | 8    | 7    | 8     | 6    |
|  | Tdnd                                               | Aniline dioxygenase                                                                | 12   | 21   | 33   | 45    | 30   |
|  | Xind                                               | 4-Hydroxybenzoate 3-monoxygenase                                                   | 695  | 2463 | 3099 | 8911  | 2669 |
|  |                                                    |                                                                                    | 4    | 25   | 29   | 88    | 29   |
|  | <b>Polycyclic aromatics</b>                        |                                                                                    | 25   | 125  | 422  | 150   | 150  |
|  | bphb                                               | 2,3-Dihydro-2,3-dihydroxybiphenyl dehydrogenase                                    | 33   | 151  | 696  | 184   | 184  |
|  | bphc                                               | 2,3-Dihydroxybiphenyl 1,2-dioxygenase                                              | 57   | 296  | 353  | 969   | 337  |
|  | bphd                                               | 2-Hydroxy-6-oxo-6-phenylhexa-2,4-dienoate hydrolase                                | 3    | 4    | 10   | 7     | 7    |
|  | BpH1                                               | 4-Hydroxy-2-oxovalerate aldolase                                                   | 1    | 1    | 3    | 2     | 2    |
|  | naib                                               | 1,2-Dihydroxy-1,2-dihydronaphthalene dehydrogenase                                 | 4    | 13   | 34   | 17    | 19   |
|  | naic_2                                             | 1,2-Dihydroxynaphthalene dioxygenase                                               | 1    | 2    | 6    | 2     | 3    |
|  | nahf                                               | Salicylaldehyde dehydrogenase                                                      | 0    | 9    | 9    | 18    | 5    |
|  | phdc                                               | 2-Hydroxychromene-2-carboxylate isomerase                                          | 2    | 1    | 3    | 2     | 3    |
|  | phdi                                               | 1-Hydroxy-2-naphthoate dioxygenase                                                 | 0    | 9    | 9    | 18    | 5    |
|  | phdj                                               | Trans-2-carboxybenzalpyruvate hydratase                                            | 3    | 7    | 10   | 19    | 10   |
|  | Qoqf                                               | Quinoline 2-oxidoacetate large subunit                                             | 4    | 11   | 15   | 25    | 17   |
|  | Quinoline                                          | Putative 2-oxo-1,2-dihydroquinoline 8-monoxygenase oxygenase subunit               | 137  | 663  | 887  | 2350  | 782  |
|  | Phdk                                               | 2-Carboxybenzaldehyde dehydrogenase                                                | 1793 | 7141 | 8388 | 23301 | 6265 |
|  |                                                    |                                                                                    | 1    | 2    | 2    | 5     | 2    |
|  |                                                    |                                                                                    | 4    | 24   | 28   | 139   | 26   |
|  |                                                    |                                                                                    | 7    | 50   | 57   | 147   | 57   |
|  |                                                    |                                                                                    | 32   | 217  | 249  | 500   | 258  |
|  |                                                    |                                                                                    | 1    | 0    | 1    | 1     | 1    |
|  |                                                    |                                                                                    | 46   | 275  | 321  | 663   | 205  |
|  |                                                    |                                                                                    | 25   | 148  | 174  | 490   | 223  |
|  |                                                    |                                                                                    | 117  | 715  | 832  | 2143  | 772  |
|  | <b>Aromatics Total</b>                             |                                                                                    | 137  | 663  | 887  | 2350  | 782  |
|  |                                                    |                                                                                    | 1    | 2    | 2    | 5     | 2    |
|  |                                                    |                                                                                    | 4    | 24   | 28   | 139   | 26   |
|  |                                                    |                                                                                    | 7    | 50   | 57   | 147   | 57   |
|  |                                                    |                                                                                    | 32   | 217  | 249  | 500   | 258  |
|  |                                                    |                                                                                    | 1    | 0    | 1    | 1     | 1    |
|  |                                                    |                                                                                    | 46   | 275  | 321  | 663   | 205  |
|  |                                                    |                                                                                    | 25   | 148  | 174  | 490   | 223  |
|  |                                                    |                                                                                    | 117  | 715  | 832  | 2143  | 772  |
|  | <b>Chlorinated solvents</b>                        |                                                                                    | 50   | 367  | 417  | 988   | 240  |
|  | Dcma                                               | Dichloromethane dehalogenase                                                       | 17   | 102  | 119  | 278   | 123  |
|  | Cma                                                | Uroporphyrinogen decarboxylase (URO-D)                                             | 1    | 71   | 72   | 142   | 1    |
|  | Dhh                                                | Halooacetate dehalogenase                                                          | 5    | 27   | 32   | 84    | 29   |
|  | Dehh109                                            | halooacid dehalogenase, type II:HAD-superfamily hydrolase, subfamily IA, variant 2 | 19   | 42   | 61   | 118   | 9    |
|  | DL_dex                                             | DL-2-haloacid dehalogenase                                                         | 4    | 4    | 10   | 8     | 8    |
|  | Exa(maxf)                                          | Quinoprotein ethanol dehydrogenase                                                 | 11   | 50   | 61   | 128   | 45   |
|  | Rd                                                 | Reductive dehalogenase, putative                                                   | 1    | 0    | 1    | 1     | 1    |
|  |                                                    |                                                                                    | 34   | 161  | 418  | 195   | 195  |
|  |                                                    |                                                                                    | 47   | 370  | 417  | 1182  | 324  |
|  |                                                    |                                                                                    | 1    | 1    | 1    | 3     | 3    |
|  |                                                    |                                                                                    | 5    | 23   | 28   | 56    | 24   |
|  |                                                    |                                                                                    | 5    | 34   | 39   | 77    | 41   |
|  |                                                    |                                                                                    | 18   | 68   | 86   | 267   | 33   |
|  | <b>Chlorinated solvents Total</b>                  |                                                                                    | 218  | 1319 | 1333 | 3750  | 1076 |
|  |                                                    |                                                                                    | 90   | 274  | 364  | 1252  | 432  |
|  |                                                    |                                                                                    | 3    | 16   | 35   | 119   | 19   |
|  |                                                    |                                                                                    | 6    | 17   | 46   | 23    | 23   |
|  |                                                    |                                                                                    | 22   | 11   | 33   | 53    | 21   |
|  |                                                    |                                                                                    | 9    | 2    | 11   | 11    | 2    |
|  |                                                    |                                                                                    | 2    | 21   | 40   | 23    | 23   |
|  |                                                    |                                                                                    | 27   | 179  | 434  | 206   | 206  |
|  |                                                    |                                                                                    | 6    | 15   | 30   | 21    | 21   |
|  |                                                    |                                                                                    | 11   | 26   | 66   | 37    | 37   |
|  |                                                    |                                                                                    | 1    | 15   | 29   | 16    | 16   |
|  |                                                    |                                                                                    | 10   | 35   | 45   | 84    | 44   |
|  |                                                    |                                                                                    | 8    | 11   | 30   | 19    | 19   |
|  |                                                    |                                                                                    | 2    | 9    | 27   | 11    | 11   |
|  |                                                    |                                                                                    | 1    | 4    | 9    | 5     | 5    |
|  |                                                    |                                                                                    | 18   | 45   | 63   | 117   | 20   |
|  |                                                    |                                                                                    | 216  | 680  | 516  | 2263  | 899  |
|  | <b>Herbicides related compound</b>                 |                                                                                    | 28   | 171  | 400  | 199   | 199  |
|  | Atza                                               | Atrazine chlorohydrolase                                                           | 13   | 47   | 60   | 344   | 59   |
|  | Atzb                                               | Hydroxyatrazine hydrolase                                                          | 0    | 1    | 1    | 2     | 1    |
|  | Atzc                                               | N-isopropylammelide isopropylaminohydrolase                                        | 7    | 81   | 88   | 1420  | 110  |
|  | Atzd                                               | Cyanuric acid amidohydrolase                                                       | 1    | 9    | 10   | 20    | 12   |
|  | Mauab                                              | Methylamine dehydrogenase small subunit                                            | 2    | 11   | 13   | 23    | 11   |
|  | Pcpa                                               | 2,5-Dichloro-p-hydroquinone 1,2-dioxygenase                                        | 0    | 1    | 1    | 2     | 2    |
|  | Pcpb                                               | Pentachlorophenol 4-monoxygenase                                                   | 5    | 26   | 31   | 32    | 22   |
|  | pcpc                                               | Tetrachlorohydroquinone reductive dehalogenase                                     | 6    | 12   | 18   | 32    | 22   |
|  | pcpe                                               | Maleylacetate reductase                                                            | 3    | 0    | 3    | 3     | 6    |
|  | Phn                                                | Phosphonate C-P lyase system protein PhnL                                          | 18   | 45   | 63   | 117   | 20   |
|  | Tcpa                                               | Chlorophenol 4-monoxygenase                                                        | 216  | 680  | 516  | 2263  | 899  |
|  | Trza                                               | N-ethylammelmine chlorohydrolase                                                   | 13   | 47   | 60   | 344   | 59   |
|  | Trze                                               | Bluret hydrolase                                                                   | 0    | 1    | 1    | 2     | 1    |
|  | Trzn                                               | Triazine hydrolase                                                                 | 5    | 23   | 28   | 56    | 24   |
|  |                                                    |                                                                                    | 18   | 68   | 86   | 267   | 33   |
|  | <b>Herbicides related compound Total</b>           |                                                                                    | 218  | 1319 | 1333 | 3750  | 1076 |
|  |                                                    |                                                                                    | 90   | 274  | 364  | 1252  | 432  |
|  |                                                    |                                                                                    | 3    | 16   | 35   | 119   | 19   |
|  |                                                    |                                                                                    | 6    | 17   | 46   | 23    | 23   |
|  |                                                    |                                                                                    | 22   | 11   | 33   | 53    | 21   |
|  |                                                    |                                                                                    | 9    | 2    | 11   | 11    | 2    |
|  |                                                    |                                                                                    | 2    | 21   | 40   | 23    | 23   |
|  |                                                    |                                                                                    | 27   | 179  | 434  | 206   | 206  |
|  |                                                    |                                                                                    | 6    | 15   | 30   | 21    | 21   |
|  |                                                    |                                                                                    | 11   | 26   | 66   | 37    | 37   |
|  |                                                    |                                                                                    | 1    | 15   | 29   | 16    | 16   |
|  |                                                    |                                                                                    | 10   | 35   | 45   | 84    | 44   |
|  |                                                    |                                                                                    | 8    | 11   | 30   | 19    | 19   |
|  |                                                    |                                                                                    | 2    | 9    | 27   | 11    | 11   |
|  |                                                    |                                                                                    | 1    | 4    | 9    | 5     | 5    |
|  |                                                    |                                                                                    | 18   | 45   | 63   | 117   | 20   |
|  |                                                    |                                                                                    | 216  | 680  | 516  | 2263  | 899  |
|  | <b>Other Hydrocarbons</b>                          |                                                                                    | 28   | 171  | 400  | 199   | 199  |
|  | alkb                                               | Alkane 1-monoxygenase                                                              | 13   | 47   | 60   | 344   | 59   |
|  | alkh                                               | Aldehyde dehydrogenase                                                             | 0    | 1    | 1    | 2     | 1    |
|  | alkj                                               | Alcohol dehydrogenase                                                              | 7    | 81   | 88   | 1420  | 110  |
|  | Assa                                               | Alkylsuccinate synthase                                                            | 1    | 9    | 10   | 20    | 12   |
|  | Bmo                                                | Butane monoxygenase beta subunit                                                   | 2    | 11   | 13   | 23    | 11   |
|  | chna                                               | Cyclohexanol dehydrogenase                                                         | 0    | 1    | 1    | 2     | 2    |
|  | chnb                                               | Cyclohexanone 1,2-monoxygenase                                                     | 5    | 26   | 31   | 32    | 22   |
|  | chnc                                               | 1-Oxo-2-oxocyclohexane lactonase                                                   | 6    | 12   | 18   | 32    | 22   |
|  | chnd                                               | 6-Hydroxyhexanoate dehydrogenase                                                   | 3    | 0    | 3    | 3     | 6    |
|  | chne                                               | 6-Oxohexanoate dehydrogenase                                                       | 18   | 45   | 63   | 117   | 20   |
|  | Cpna                                               | Cyclopentanol dehydrogenase                                                        | 216  | 680  | 516  | 2263  | 899  |
|  | cpnb                                               | Cyclopentanone 1,2-monoxygenase                                                    | 13   | 47   | 60   | 344   | 59   |
|  | cpnc                                               | 5-Valerolactone hydrolase                                                          | 0    | 1    | 1    | 2     | 1    |
|  | cpne                                               | 5-Oxovalerate dehydrogenase                                                        | 7    | 81   | 88   | 1420  | 110  |
|  | Xamo                                               | Phenol 2-monoxygenase                                                              | 1    | 9    | 10   | 20    | 12   |
|  |                                                    |                                                                                    | 2    | 11   | 13   | 23    | 11   |
|  |                                                    |                                                                                    | 22   | 96   | 118  | 282   | 121  |
|  |                                                    |                                                                                    | 0    | 1    | 1    | 2     | 2    |
|  |                                                    |                                                                                    | 5    | 26   | 31   | 32    | 22   |
|  |                                                    |                                                                                    | 6    | 12   | 18   | 32    | 22   |
|  |                                                    |                                                                                    | 3    | 0    | 3    | 3     | 6    |
|  |                                                    |                                                                                    | 216  | 680  | 516  | 2263  | 899  |
|  | <b>Others</b>                                      |                                                                                    | 28   | 171  | 400  | 199   | 199  |
|  | alkk                                               | Medium-chain acyl-CoA synthetase                                                   | 13   | 47   | 60   | 344   | 59   |
|  | Aln                                                | Nitrilase                                                                          | 0    | 1    | 1    | 2     | 1    |
|  | Caad                                               | Cis-3-Chloroacrylic acid dehalogenase, putative                                    | 7    | 81   | 88   | 1420  | 110  |
|  | Dmsa                                               | Dimethyl sulfoxide reductase                                                       | 1    | 9    | 10   | 20    | 12   |
|  | Mzad                                               | Malonate semialdehyde decarboxylase                                                | 2    | 11   | 13   | 23    | 11   |
|  | Msmabcd                                            | Dimethyl sulfoxide reductase                                                       | 22   | 96   | 118  | 282   | 121  |
|  | Nitro                                              | Xenobiotic reductase                                                               | 0    | 1    | 1    | 2     | 2    |
|  | Onr                                                | Pentaerythritol tetranitrate reductase                                             | 5    | 26   | 31   | 32    | 22   |
|  | Scnabc                                             | Thiocyanate hydrolase gamma subunit                                                | 6    | 12   | 18   | 32    | 22   |
|  | Sda                                                | Taurine dioxygenase                                                                | 3    | 0    | 3    | 3     | 6    |
|  | ThmAB                                              | Xenobiotic reductase                                                               | 216  | 680  | 516  | 2263  | 899  |
|  |                                                    |                                                                                    | 28   | 171  | 400  | 199   | 199  |
|  |                                                    |                                                                                    | 13   | 47   | 60   | 344   | 59   |
|  |                                                    |                                                                                    | 0    | 1    | 1    | 2     | 1    |
|  |                                                    |                                                                                    | 7    | 81   | 88   | 1420  | 110  |
|  |                                                    |                                                                                    | 1    | 9    | 10   | 20    | 12   |
|  |                                                    |                                                                                    | 2    | 11   | 13   | 23    | 11   |
|  |                                                    |                                                                                    | 22   | 96   | 118  | 282   | 121  |
|  |                                                    |                                                                                    | 0    | 1    | 1    | 2     | 2    |
|  |                                                    |                                                                                    | 5    | 26   | 31   | 32    | 22   |
|  |                                                    |                                                                                    | 6    | 12   | 18   | 32    | 22   |
|  |                                                    |                                                                                    | 3    | 0    | 3    | 3     | 6    |
|  |                                                    |                                                                                    | 216  | 680  | 516  | 2263  | 899  |
|  | <b>Other Organic Contaminant Degradation Total</b> |                                                                                    | 87   | 455  | 343  | 2860  | 565  |
|  |                                                    |                                                                                    | 3    | 20   | 23   | 51    | 10   |
|  |                                                    |                                                                                    | 0    | 1    | 1    | 37    | 1    |
|  |                                                    |                                                                                    | 35   | 298  | 1118 | 333   | 333  |
|  |                                                    |                                                                                    | 11   |      |      |       |      |

|                               |                                   |                                     |                                                                                             |                                                              |              |              |             |          |   |
|-------------------------------|-----------------------------------|-------------------------------------|---------------------------------------------------------------------------------------------|--------------------------------------------------------------|--------------|--------------|-------------|----------|---|
|                               |                                   | RseB                                | Sigma-E factor negative regulatory protein RseB                                             | 4                                                            | 77           | 81           | 184         | 0        |   |
|                               | <b>Anti-sigma Factor Total</b>    |                                     |                                                                                             | <b>17</b>                                                    | <b>203</b>   | <b>220</b>   | <b>506</b>  | <b>0</b> |   |
| <b>Cold shock</b>             |                                   | CspA                                | Cold shock protein                                                                          | 3                                                            | 91           | 94           | 266         | 0        |   |
|                               |                                   | CspB                                | Cold shock protein CspB                                                                     | 1                                                            | 52           | 53           | 161         | 0        |   |
|                               |                                   | CspG                                | Cold shock-like protein CspG                                                                | 2                                                            | 36           | 38           | 102         | 0        |   |
|                               |                                   | DesK                                | Two-component sensor histidine kinase desk                                                  | 5                                                            | 43           | 48           | 119         | 0        |   |
|                               |                                   | DesR                                | Two-component system, NarL family, response regulator DesR                                  | 2                                                            | 29           | 31           | 66          | 0        |   |
|                               |                                   | <b>Cold Shock Total</b>             |                                                                                             | <b>13</b>                                                    | <b>251</b>   | <b>264</b>   | <b>714</b>  | <b>0</b> |   |
| <b>Envelope stress</b>        |                                   | BaeR                                | Transcriptional regulatory protein, C-terminal domain protein                               | 6                                                            | 35           | 41           | 81          | 0        |   |
|                               |                                   | BaeS                                | Sensory histidine kinase in two-component regulatory system with BaeR                       | 2                                                            | 11           | 13           | 28          | 0        |   |
|                               |                                   | CpxA                                | Two component system histidine kinase                                                       | 19                                                           | 187          | 206          | 674         | 0        |   |
|                               |                                   | CpxP                                | Envelope stress induced periplasmic protein                                                 | 1                                                            | 10           | 11           | 20          | 0        |   |
|                               |                                   | CpxR                                | CpxR family transcriptional regulator                                                       | 22                                                           | 272          | 294          | 955         | 0        |   |
|                               |                                   | PspA                                | Phage shock protein A                                                                       | 38                                                           | 491          | 529          | 1163        | 0        |   |
|                               |                                   | PspB                                | Phage shock protein B                                                                       | 4                                                            | 106          | 110          | 392         | 0        |   |
|                               |                                   | PspC                                | Phage shock protein C, PspC                                                                 | 38                                                           | 345          | 383          | 809         | 0        |   |
|                               |                                   | PspD                                | Phage shock protein D                                                                       | 0                                                            | 7            | 7            | 17          | 0        |   |
|                               |                                   | PspF                                | Phage shock protein F                                                                       | 40                                                           | 232          | 272          | 556         | 0        |   |
|                               |                                   | <b>Envelope Stress Total</b>        |                                                                                             | <b>170</b>                                                   | <b>1696</b>  | <b>1866</b>  | <b>4695</b> | <b>0</b> |   |
| <b>Glucose limitation</b>     |                                   | BglH                                | Aryl-phospho-beta-d-glucosidase                                                             | 8                                                            | 81           | 89           | 200         | 0        |   |
|                               |                                   | IglP                                | Phosphotransferase system (PTS) beta-glucoside-specific enzyme IIBCA component              | 2                                                            | 65           | 67           | 170         | 0        |   |
|                               |                                   | CcpA                                | Catabolite control protein A                                                                | 43                                                           | 205          | 248          | 645         | 0        |   |
|                               |                                   | CsiD                                | Carbon starvation-inducible protein                                                         | 0                                                            | 18           | 18           | 46          | 0        |   |
|                               |                                   | Lrp                                 | Leucine-responsive regulatory protein                                                       | 16                                                           | 250          | 266          | 726         | 0        |   |
|                               |                                   | <b>Glucose Limitation Total</b>     |                                                                                             | <b>69</b>                                                    | <b>619</b>   | <b>688</b>   | <b>1787</b> | <b>0</b> |   |
| <b>Heat shock</b>             |                                   | ClpP                                | ATP-dependent Clp protease proteolytic subunit                                              | 259                                                          | 1289         | 1548         | 3177        | 0        |   |
|                               |                                   | OnaK                                | Molecular chaperone OnaK                                                                    | 0                                                            | 165          | 165          | 614         | 0        |   |
|                               |                                   | GroEL                               | Putative heat-shock protein hsp60                                                           | 60                                                           | 131          | 191          | 407         | 0        |   |
|                               |                                   | GroES                               | Chaperonin Cpn10                                                                            | 16                                                           | 57           | 73           | 134         | 0        |   |
|                               |                                   | GrpE                                | GrpE protein                                                                                | 16                                                           | 359          | 375          | 1139        | 0        |   |
|                               |                                   | HrcA                                | Heat-inducible transcription repressor HrcA                                                 | 91                                                           | 500          | 591          | 1985        | 0        |   |
|                               |                                   | HspR                                | Heat shock protein transcriptional repressor HspR2 (Hsp2 protein)                           | 0                                                            | 2            | 1            | 0           | 0        |   |
|                               |                                   | <b>Heat Shock Total</b>             |                                                                                             | <b>442</b>                                                   | <b>2502</b>  | <b>2944</b>  | <b>7458</b> | <b>0</b> |   |
|                               |                                   | HspX                                | Heat shock protein hspX                                                                     | 0                                                            | 5            | 10           | 5           | 0        |   |
| <b>Intracellular survival</b> |                                   | KatB                                | Catalase-peroxidase KatB                                                                    | 0                                                            | 4            | 4            | 15          | 0        |   |
|                               |                                   | KatG                                | Catalase/oxidase HPI                                                                        | 0                                                            | 1            | 1            | 2           | 0        |   |
|                               |                                   | <b>Intracellular Survival Total</b> |                                                                                             | <b>0</b>                                                     | <b>10</b>    | <b>10</b>    | <b>27</b>   | <b>0</b> |   |
| <b>Nitrogen limitation</b>    |                                   | GlnA                                | Glutamine synthetase, putative                                                              | 7                                                            | 1037         | 1044         | 4662        | 0        |   |
|                               |                                   | GlnR                                | HTH-type transcriptional regulator glnR                                                     | 14                                                           | 165          | 179          | 1179        | 0        |   |
|                               |                                   | NtrB                                | Nitrogen regulation protein NtrB                                                            | 25                                                           | 176          | 201          | 391         | 0        |   |
|                               |                                   | NtrC                                | Nitrogen regulation protein NtrC                                                            | 32                                                           | 496          | 528          | 1137        | 0        |   |
|                               |                                   | NtrA                                | Nitrogen sensing transcriptional regulator                                                  | 1                                                            | 10           | 11           | 45          | 0        |   |
|                               |                                   | <b>Nitrogen Limitation Total</b>    |                                                                                             | <b>79</b>                                                    | <b>1884</b>  | <b>1963</b>  | <b>7414</b> | <b>0</b> |   |
| <b>Osmotic stress</b>         |                                   | DegS                                | Two-component sensor histidine kinase DegS                                                  | 16                                                           | 114          | 130          | 276         | 0        |   |
|                               |                                   | DegU                                | Transcriptional regulatory protein degU                                                     | 8                                                            | 97           | 105          | 209         | 0        |   |
|                               |                                   | KdpE                                | KDP operon transcriptional regulatory protein KdpE                                          | 17                                                           | 466          | 483          | 2737        | 0        |   |
|                               |                                   | MtrA                                | DNA-binding response regulator MtrA                                                         | 6                                                            | 54           | 60           | 125         | 0        |   |
|                               |                                   | MtrB                                | Two component sensor histidine kinase mtrB                                                  | 3                                                            | 59           | 62           | 137         | 0        |   |
|                               |                                   | OmpR                                | Osmolarity response regulator                                                               | 57                                                           | 742          | 799          | 1710        | 0        |   |
|                               |                                   | OpuE                                | Osmoregulated proline transporter OpuE                                                      | 1                                                            | 38           | 39           | 140         | 0        |   |
|                               |                                   | ProV                                | Glycine betaine/L-proline transport ATP-binding subunit                                     | 7                                                            | 214          | 221          | 1305        | 0        |   |
|                               |                                   | ProW                                | Putative glycine betaine/L-proline transport system permease protein ProW                   | 3                                                            | 18           | 21           | 44          | 0        |   |
|                               |                                   | ProX                                | L-proline glycine betaine binding ABC transporter protein proX                              | 16                                                           | 14           | 30           | 120         | 0        |   |
|                               |                                   | <b>Osmotic Stress Total</b>         |                                                                                             | <b>134</b>                                                   | <b>1816</b>  | <b>1950</b>  | <b>6803</b> | <b>0</b> |   |
| <b>Oxidative stress</b>       |                                   | AhpC                                | Alkyl hydroperoxide reductase C                                                             | 145                                                          | 789          | 934          | 2134        | 0        |   |
|                               |                                   | AhpF                                | Alkyl hydroperoxide reductase, F subunit                                                    | 57                                                           | 431          | 488          | 1522        | 0        |   |
|                               |                                   | KatA                                | Catalase                                                                                    | 14                                                           | 154          | 168          | 455         | 0        |   |
|                               |                                   | OxyR                                | Hydrogen peroxide-inducible genes activator OxyR/DNA-binding transcriptional regulator OxyR | 9                                                            | 297          | 306          | 1361        | 0        |   |
|                               |                                   | PerR                                | Peroxide-responsive repressor PerR                                                          | 7                                                            | 58           | 65           | 192         | 0        |   |
|                               |                                   | SodA                                | Superoxide dismutase                                                                        | 102                                                          | 687          | 789          | 1614        | 0        |   |
|                               |                                   | SoxR_OR_marC                        | Redox-sensitive transcriptional activator SoxR                                              | 6                                                            | 158          | 164          | 354         | 0        |   |
|                               |                                   | SoxS                                | DNA-binding transcriptional regulator SoxS                                                  | 7                                                            | 108          | 115          | 238         | 0        |   |
|                               |                                   | <b>Oxidative Stress Total</b>       |                                                                                             | <b>347</b>                                                   | <b>2682</b>  | <b>3029</b>  | <b>7870</b> | <b>0</b> |   |
|                               | <b>Oxygen limitation</b>          |                                     | ArcA                                                                                        | Aerobic respiration control protein ArcA                     | 1            | 75           | 76          | 251      | 0 |
|                               |                                   | ArcB                                | Multi-sensor hybrid histidine kinase                                                        | 21                                                           | 90           | 111          | 214         | 0        |   |
|                               |                                   | CydA                                | Cytochrome d ubiquinol oxidase, subunit 1                                                   | 2                                                            | 74           | 76           | 381         | 0        |   |
|                               |                                   | CydB                                | Cytochrome bd plastocyanin oxidase subunit 2 apoprotein                                     | 21                                                           | 519          | 540          | 1410        | 0        |   |
|                               |                                   | Fnr                                 | Transcriptional regulator, Cys/Fnr family                                                   | 2                                                            | 1524         | 1524         | 3067        | 0        |   |
|                               |                                   | NarH                                | Nitrate reductase (beta subunit)                                                            | 6                                                            | 185          | 191          | 837         | 0        |   |
|                               |                                   | NarI                                | Nitrate reductase (gamma subunit)                                                           | 35                                                           | 450          | 485          | 1759        | 0        |   |
|                               |                                   | NarJ                                | Nitrate reductase (delta subunit)                                                           | 9                                                            | 164          | 173          | 467         | 0        |   |
|                               |                                   | NsrR                                | Nitrite-sensitive transcriptional repressor NsrR                                            | 3                                                            | 116          | 119          | 327         | 0        |   |
|                               |                                   | ResD                                | Transcriptional regulatory protein ResD                                                     | 2                                                            | 125          | 127          | 354         | 0        |   |
|                               |                                   | ResE                                | Sensor histidine kinase ResE                                                                | 6                                                            | 56           | 62           | 168         | 0        |   |
|                               |                                   | <b>Oxygen Limitation Total</b>      |                                                                                             | <b>108</b>                                                   | <b>3376</b>  | <b>3484</b>  | <b>9235</b> | <b>0</b> |   |
| <b>Phosphate limitation</b>   |                                   |                                     | PhoA                                                                                        | Vacuolar alkaline phosphatase                                | 19           | 110          | 129         | 453      | 0 |
|                               |                                   |                                     | PhoB                                                                                        | Two component transcriptional regulator, winged helix family | 17           | 349          | 366         | 1273     | 0 |
|                               |                                   | PstA                                | Phosphate ABC transporter, inner membrane subunit PstA                                      | 0                                                            | 454          | 454          | 1495        | 0        |   |
|                               |                                   | PstB                                | Phosphate ABC transporter, ATP-binding protein                                              | 52                                                           | 972          | 1024         | 7285        | 0        |   |
|                               |                                   | PstC                                | Phosphate ABC transporter, permease protein PstC                                            | 48                                                           | 423          | 471          | 1945        | 0        |   |
|                               |                                   | PstS                                | ABC-type phosphate transport system periplasmic component PstS                              | 24                                                           | 173          | 197          | 384         | 0        |   |
|                               | <b>Phosphate Limitation Total</b> |                                     | <b>160</b>                                                                                  | <b>2481</b>                                                  | <b>2641</b>  | <b>12845</b> | <b>0</b>    |          |   |
| <b>Protein stress</b>         |                                   | ClpC                                | ATP-dependent Clp protease, ATP-binding subunit ClpC                                        | 9                                                            | 258          | 267          | 1566        | 0        |   |
|                               |                                   | CtsR                                | Transcriptional regulator CtsR                                                              | 14                                                           | 191          | 205          | 1124        | 0        |   |
|                               |                                   | DegP                                | Serine protease                                                                             | 14                                                           | 270          | 284          | 727         | 0        |   |
|                               |                                   | <b>Protein Stress Total</b>         |                                                                                             | <b>37</b>                                                    | <b>719</b>   | <b>756</b>   | <b>3417</b> | <b>0</b> |   |
| <b>General stress</b>         |                                   | KatE                                | Catalase 2                                                                                  | 85                                                           | 434          | 522          | 2218        | 0        |   |
|                               |                                   | <b>General stress Total</b>         |                                                                                             | <b>88</b>                                                    | <b>434</b>   | <b>522</b>   | <b>2218</b> | <b>0</b> |   |
| <b>RNA-binding protein</b>    |                                   | Hfq_5f0_stress                      | RNA chaperone Hfq                                                                           | 3                                                            | 35           | 38           | 77          | 0        |   |
|                               |                                   | <b>RNA-binding protein Total</b>    |                                                                                             | <b>3</b>                                                     | <b>35</b>    | <b>38</b>    | <b>77</b>   | <b>0</b> |   |
| <b>Sigma factor</b>           |                                   | Ecf                                 | RNA polymerase, sigma-24 subunit, ECF subfamily                                             | 29                                                           | 51           | 80           | 157         | 0        |   |
|                               |                                   | Sigma_24                            | RNA polymerase, sigma-24 subunit, ECF subfamily                                             | 161                                                          | 2194         | 2195         | 4927        | 0        |   |
|                               |                                   | Sigma_32                            | RNA polymerase sigma factor                                                                 | 50                                                           | 428          | 478          | 1106        | 0        |   |
|                               |                                   | Sigma_38                            | RNA polymerase sigma-38 factor                                                              | 31                                                           | 266          | 297          | 916         | 0        |   |
|                               |                                   | Sigma_70                            | RNA polymerase, sigma 70 subunit, RpoD family                                               | 106                                                          | 1046         | 1152         | 2423        | 0        |   |
|                               |                                   | <b>Sigma Factor Total</b>           |                                                                                             | <b>377</b>                                                   | <b>3985</b>  | <b>4362</b>  | <b>9529</b> | <b>0</b> |   |
| <b>Stringent response</b>     |                                   | ObgE                                | GTPase                                                                                      | 26                                                           | 604          | 630          | 4355        | 0        |   |
|                               |                                   | Spot                                | (p)ppGpp synthetase, RelA/Spot family                                                       | 28                                                           | 305          | 334          | 730         | 0        |   |
|                               |                                   | <b>Stringent Response Total</b>     |                                                                                             | <b>54</b>                                                    | <b>910</b>   | <b>964</b>   | <b>5085</b> | <b>0</b> |   |
| <b>Stress Total</b>           |                                   |                                     | <b>2098</b>                                                                                 | <b>23634</b>                                                 | <b>25732</b> | <b>79748</b> | <b>0</b>    |          |   |
| <b>Plant Growth Promotion</b> | <b>Adhesion</b>                   | Paa                                 | Porcine attaching-effacing associated protein                                               | 0                                                            | 2            | 2            | 4           | 0        |   |
|                               |                                   | Hsp60                               | Heat shock protein 60                                                                       | 1                                                            | 0            | 1            | 1           | 0        |   |
|                               |                                   | Pyoverdin_pvcC                      | Pyoverdin chromophore biosynthetic protein pvcC                                             | 0                                                            | 3            | 3            | 6           | 0        |   |
|                               | <b>Adhesion Total</b>             |                                     | <b>1</b>                                                                                    | <b>5</b>                                                     | <b>6</b>     | <b>11</b>    | <b>0</b>    |          |   |
| <b>Disease suppression</b>    | <b>Disease Suppression Total</b>  | HcnB                                | Hydrogen cyanide synthase HcnB                                                              | 12                                                           | 6            | 18           | 22          | 0        |   |
|                               |                                   |                                     |                                                                                             | <b>12</b>                                                    | <b>6</b>     | <b>18</b>    | <b>22</b>   | <b>0</b> |   |
| <b>Drought tolerance</b>      |                                   | Tre_arc                             | Trehalose synthase                                                                          | 1                                                            | 5            | 6            | 12          | 0        |   |
|                               |                                   | Tre_fun                             | Alpha,alpha-trehalose-phosphate synthase                                                    | 131                                                          | 63           | 194          | 277         | 0        |   |

|                                         |                                     |                                                                           |                                                                                                     |                                      |                |              |             |            |          |     |
|-----------------------------------------|-------------------------------------|---------------------------------------------------------------------------|-----------------------------------------------------------------------------------------------------|--------------------------------------|----------------|--------------|-------------|------------|----------|-----|
|                                         | <b>Drought Tolerance Total</b>      |                                                                           |                                                                                                     | <b>132</b>                           | <b>68</b>      | <b>200</b>   | <b>289</b>  | <b>0</b>   |          |     |
| <b>Phytohormone</b>                     | Cad                                 | Cadaverine                                                                | 0                                                                                                   | 3                                    | 3              | 7            | 0           | 0          |          |     |
|                                         | Cks                                 | Xanthine dehydrogenase subunit A                                          | 0                                                                                                   | 1                                    | 1              | 0            | 0           | 0          |          |     |
|                                         | Eth                                 | Ethylene-forming enzyme                                                   | 2                                                                                                   | 0                                    | 2              | 2            | 0           | 0          |          |     |
|                                         | Gas                                 | Gibberellin biosynthesis-related                                          | 1                                                                                                   | 1                                    | 2              | 3            | 0           | 0          |          |     |
|                                         | lpya                                | Thiamine pyrophosphate protein TPP binding domain protein                 | 3                                                                                                   | 23                                   | 26             | 49           | 0           | 0          |          |     |
|                                         | Nep                                 | Necrosis and ethylene-inducing                                            | 5                                                                                                   | 10                                   | 15             | 13           | 0           | 0          |          |     |
|                                         | Spe                                 | Spermine synthase                                                         | 25                                                                                                  | 118                                  | 143            | 262          | 0           | 0          |          |     |
|                                         | Spe_d_ara                           | Spermine synthase / spermidine synthase                                   | 2                                                                                                   | 23                                   | 25             | 49           | 0           | 0          |          |     |
|                                         | Spe_d_bac                           | Spermine synthase / spermidine synthase                                   | 27                                                                                                  | 255                                  | 282            | 558          | 0           | 0          |          |     |
|                                         | <b>Phytohormone Total</b>           |                                                                           |                                                                                                     | <b>66</b>                            | <b>433</b>     | <b>499</b>   | <b>944</b>  | <b>0</b>   |          |     |
|                                         | <b>Stress</b>                       | <b>Stress Total</b>                                                       |                                                                                                     | <b>35</b>                            | <b>109</b>     | <b>144</b>   | <b>257</b>  | <b>0</b>   |          |     |
|                                         |                                     | Acc                                                                       | 1-Aminocyclopropane-1-carboxylate deaminase                                                         | 35                                   | 109            | 144          | 257         | 0          |          |     |
|                                         | <b>Antioxidant enzyme</b>           | Cat_arc                                                                   | Catalase                                                                                            | 2                                    | 8              | 10           | 18          | 0          | 0        |     |
| Cat_bac                                 |                                     | Catalase                                                                  | 80                                                                                                  | 383                                  | 461            | 978          | 0           | 0          |          |     |
| Cat_fun                                 |                                     | Peroxisomal catalase                                                      | 69                                                                                                  | 36                                   | 105            | 134          | 0           | 0          |          |     |
| Per_arc                                 |                                     | Alkyl hydroperoxide reductase / Thiol specific antioxidant / Mal allergen | 2                                                                                                   | 20                                   | 22             | 42           | 0           | 0          |          |     |
| Per_bac                                 |                                     | Peroxidase                                                                | 6                                                                                                   | 27                                   | 33             | 63           | 0           | 0          |          |     |
| Per_fun                                 |                                     | Versatile peroxidase VPL1                                                 | 111                                                                                                 | 66                                   | 177            | 279          | 0           | 0          |          |     |
| <b>Antioxidant Enzyme Total</b>         |                                     |                                                                           | <b>270</b>                                                                                          | <b>538</b>                           | <b>808</b>     | <b>1514</b>  | <b>0</b>    |            |          |     |
| <b>Anti-pathogen</b>                    | Sid_arc                             | LucA/lucC Family protein                                                  | 0                                                                                                   | 11                                   | 11             | 22           | 0           | 0          |          |     |
|                                         | Sid_bac                             | Iron transporter                                                          | 22                                                                                                  | 133                                  | 155            | 311          | 0           | 0          |          |     |
|                                         | Sid_fun                             | Aerobactin siderophore biosynthesis protein lucB                          | 43                                                                                                  | 28                                   | 71             | 91           | 0           | 0          |          |     |
|                                         | Sod_CuZn                            | Superoxide dismutase [Cu-Zn] precursor                                    | 34                                                                                                  | 103                                  | 137            | 256          | 0           | 0          |          |     |
|                                         | Sod_FeMn                            | Mn-dependent superoxide dismutase                                         | 252                                                                                                 | 447                                  | 699            | 1212         | 0           | 0          |          |     |
|                                         | Sod_nickel                          | Putative nickel-containing superoxide dismutase precursor (NISOD)         | 1                                                                                                   | 23                                   | 24             | 47           | 0           | 0          |          |     |
|                                         | Spe_d_fun(i)                        | Spermine synthase / spermidine synthase                                   | 15                                                                                                  | 6                                    | 21             | 27           | 0           | 0          |          |     |
|                                         | Nyb                                 | Xylose isomerase                                                          | 71                                                                                                  | 352                                  | 423            | 884          | 494         | 0          |          |     |
|                                         | Pec                                 | Polygalacturonase                                                         | 3                                                                                                   | 1                                    | 4              | 5            | 0           | 0          |          |     |
|                                         | <b>Anti-pathogen Total</b>          |                                                                           |                                                                                                     | <b>441</b>                           | <b>1104</b>    | <b>1545</b>  | <b>2855</b> | <b>494</b> |          |     |
|                                         | <b>Plant Growth Promotion Total</b> |                                                                           |                                                                                                     | <b>957</b>                           | <b>2263</b>    | <b>3220</b>  | <b>5892</b> | <b>494</b> |          |     |
|                                         | <b>Microbial Defense</b>            | <b>Antibiotic resistance</b>                                              | <b>Degradation</b>                                                                                  | B_lactamase                          | Beta-lactamase | 40           | 143         | 183        | 363      | 229 |
|                                         |                                     |                                                                           |                                                                                                     | B_lactamase_A                        | Beta-lactamase | 198          | 598         | 286        | 586      | 270 |
| B_lactamase_b                           |                                     |                                                                           |                                                                                                     | Beta-lactamase                       | 5              | 8            | 3           | 16         | 9        |     |
| B_lactamase_C                           |                                     |                                                                           |                                                                                                     | Beta-lactamase                       | 59             | 250          | 309         | 1140       | 0        |     |
| Fosa                                    |                                     |                                                                           |                                                                                                     | Glutathione transferase fosa         | 3              | 30           | 33          | 72         | 36       |     |
| Fosb                                    |                                     |                                                                           |                                                                                                     | Fosfomycin resistance protein FosB   | 2              | 26           | 28          | 61         | 32       |     |
| Fosx                                    |                                     |                                                                           |                                                                                                     | Fosfomycin resistance family protein | 1              | 7            | 8           | 19         | 8        |     |
| Tetr_resistance                         |                                     |                                                                           |                                                                                                     | Tetr(mono)oxigenase                  | 1              | 2            | 3           | 5          | 4        |     |
| Vgb                                     |                                     |                                                                           |                                                                                                     | Virginiamycin B lyase                | 14             | 77           | 91          | 191        | 95       |     |
| <b>Degradation Total</b>                |                                     |                                                                           |                                                                                                     | <b>193</b>                           | <b>736</b>     | <b>929</b>   | <b>2453</b> | <b>683</b> |          |     |
| <b>Subunit modification</b>             | Qnr                                 | Quinolone resistance protein                                              | 3                                                                                                   | 5                                    | 8              | 14           | 0           |            |          |     |
|                                         | Van                                 | D-alanine-D-lactate ligase/Vancomycin/teicoplanin resistance protein      | 14                                                                                                  | 34                                   | 48             | 119          | 0           |            |          |     |
|                                         | <b>Subunit Modification Total</b>   |                                                                           |                                                                                                     | <b>17</b>                            | <b>39</b>      | <b>56</b>    | <b>133</b>  | <b>0</b>   |          |     |
|                                         | <b>Transporter</b>                  | ABC_antibiotic_transporter                                                | ABC antibiotic transporter                                                                          | 182                                  | 922            | 1104         | 2426        | 0          |          |     |
|                                         |                                     | DrrC                                                                      | Daurorubicin resistance protein C                                                                   | 2                                    | 1              | 3            | 4           | 0          |          |     |
|                                         |                                     | MATE_antibiotic                                                           | Multidrug transport protein (MATE family)                                                           | 80                                   | 312            | 392          | 824         | 0          |          |     |
|                                         |                                     | Mex                                                                       | Acr family drug resistance transporter                                                              | 395                                  | 3328           | 3723         | 7936        | 0          |          |     |
|                                         |                                     | MFS_antibiotic                                                            | Major facilitator superfamily MFS_1                                                                 | 977                                  | 7000           | 7977         | 17235       | 0          |          |     |
|                                         |                                     | SMR_antibiotics                                                           | Putative multidrug transporter, SMR family, DMT Superfamily protein                                 | 63                                   | 952            | 1015         | 3332        | 0          |          |     |
|                                         |                                     | Nyb                                                                       | Xylose isomerase                                                                                    | 46                                   | 230            | 276          | 735         | 0          |          |     |
| Tet                                     |                                     | Tetracycline resistance protein                                           | 1745                                                                                                | 12745                                | 14490          | 32392        | 0           |            |          |     |
| <b>Transporter Total</b>                |                                     |                                                                           | <b>1745</b>                                                                                         | <b>12745</b>                         | <b>14490</b>   | <b>32392</b> | <b>0</b>    |            |          |     |
| <b>Antibiotic Resistance Total</b>      |                                     |                                                                           | <b>1955</b>                                                                                         | <b>13520</b>                         | <b>15475</b>   | <b>34978</b> | <b>683</b>  |            |          |     |
| <b>Antimicrobial biosynthesis</b>       | <b>Bacillysin</b>                   | BacA                                                                      | Bacillysin biosynthesis                                                                             | 2                                    | 19             | 21           | 42          | 0          |          |     |
|                                         |                                     | <b>Bacillysin Total</b>                                                   |                                                                                                     |                                      | <b>2</b>       | <b>19</b>    | <b>21</b>   | <b>42</b>  | <b>0</b> |     |
|                                         | <b>Chloramphenicol</b>              | PabA                                                                      | Aminodeoxychorismate synthase subunit II, component of p-aminobenzoate synthase multienzyme complex | 5                                    | 27             | 32           | 61          | 0          |          |     |
|                                         |                                     | <b>Chloramphenicol Total</b>                                              |                                                                                                     |                                      | <b>5</b>       | <b>27</b>    | <b>32</b>   | <b>61</b>  | <b>0</b> |     |
|                                         | <b>Gramicidin</b>                   | LgrD                                                                      | Linear gramicidin synthetase subunit D                                                              | 1                                    | 7              | 8            | 15          | 0          |          |     |
|                                         | <b>Gramicidin Total</b>             |                                                                           |                                                                                                     | <b>1</b>                             | <b>7</b>       | <b>8</b>     | <b>15</b>   | <b>0</b>   |          |     |
|                                         | <b>Lantibiotic</b>                  | EpiA                                                                      | Epidermin                                                                                           | 0                                    | 1              | 1            | 2           | 0          |          |     |
|                                         |                                     | SpaR                                                                      | Subtilin biosynthesis regulatory protein SpaR                                                       | 0                                    | 11             | 11           | 22          | 0          |          |     |
|                                         | <b>Lantibiotic Total</b>            |                                                                           |                                                                                                     | <b>0</b>                             | <b>12</b>      | <b>12</b>    | <b>24</b>   | <b>0</b>   |          |     |
|                                         | <b>Lincosamides</b>                 | LmbA                                                                      | Gamma-glutamyl transferase                                                                          | 2                                    | 1              | 3            | 5           | 0          |          |     |
| <b>Lincosamides Total</b>               |                                     |                                                                           | <b>2</b>                                                                                            | <b>1</b>                             | <b>3</b>       | <b>5</b>     | <b>0</b>    |            |          |     |
| <b>Penicillin</b>                       | PcbC                                | Isopenicillin N synthase (IPNS)                                           | 41                                                                                                  | 110                                  | 151            | 263          | 0           |            |          |     |
|                                         | <b>Penicillin Total</b>             |                                                                           |                                                                                                     | <b>41</b>                            | <b>110</b>     | <b>151</b>   | <b>263</b>  | <b>0</b>   |          |     |
| <b>Phenazine</b>                        | PhlD                                | Putative PhlD                                                             | 3                                                                                                   | 5                                    | 8              | 13           | 0           |            |          |     |
|                                         | PhzA                                | Isochorismatase                                                           | 14                                                                                                  | 18                                   | 32             | 50           | 0           |            |          |     |
|                                         | PhzC                                | Phenazine biosynthesis protein PhzC                                       | 1                                                                                                   | 1                                    | 2              | 3            | 0           |            |          |     |
|                                         | PhzF                                | PhzF family phenazine biosynthesis protein                                | 18                                                                                                  | 202                                  | 220            | 448          | 0           |            |          |     |
|                                         | <b>Phenazine Total</b>              |                                                                           |                                                                                                     | <b>36</b>                            | <b>226</b>     | <b>262</b>   | <b>514</b>  | <b>0</b>   |          |     |
| <b>Pyoluteorin</b>                      | PtlC                                | Polyketide synthase type I                                                | 0                                                                                                   | 1                                    | 1              | 3            | 0           |            |          |     |
|                                         | <b>Pyoluteorin Total</b>            |                                                                           |                                                                                                     | <b>0</b>                             | <b>1</b>       | <b>1</b>     | <b>3</b>    | <b>0</b>   |          |     |
| <b>Pyrolinitrin</b>                     | PmbB                                | PmbB                                                                      | 1                                                                                                   | 0                                    | 1              | 1            | 0           |            |          |     |
|                                         | PmbD                                | Aminopyrolinitrin oxidase                                                 | 3                                                                                                   | 2                                    | 5              | 9            | 0           |            |          |     |
| <b>Pyrolinitrin Total</b>               |                                     |                                                                           | <b>4</b>                                                                                            | <b>2</b>                             | <b>6</b>       | <b>10</b>    | <b>0</b>    |            |          |     |
| <b>Streptomycin</b>                     | StrR                                | Streptomycin biosynthesis operon regulator                                | 2                                                                                                   | 2                                    | 4              | 6            | 0           |            |          |     |
|                                         | <b>Streptomycin Total</b>           |                                                                           |                                                                                                     | <b>2</b>                             | <b>2</b>       | <b>4</b>     | <b>6</b>    | <b>0</b>   |          |     |
| <b>Antimicrobial Biosynthesis Total</b> |                                     |                                                                           | <b>93</b>                                                                                           | <b>407</b>                           | <b>500</b>     | <b>943</b>   | <b>0</b>    |            |          |     |
| <b>CRISPR</b>                           | Cas1                                | CRISPR-associated protein Cas1                                            | 294                                                                                                 | 583                                  | 877            | 1503         | 0           |            |          |     |
|                                         | Cas10_Crm2                          | CRISPR-associated protein, Crm2 family                                    | 12                                                                                                  | 160                                  | 172            | 341          | 0           |            |          |     |
|                                         | Cas10d                              | CRISPR-associated protein Cas3                                            | 1                                                                                                   | 23                                   | 24             | 47           | 0           |            |          |     |
|                                         | Cas2                                | CRISPR-associated protein Cas2                                            | 79                                                                                                  | 412                                  | 491            | 973          | 0           |            |          |     |
|                                         | Cas2_ie                             | CRISPR-associated protein Cas2                                            | 14                                                                                                  | 151                                  | 165            | 349          | 0           |            |          |     |
|                                         | Cas3                                | CRISPR-associated helicase Cas3, Anaes-subtype                            | 261                                                                                                 | 563                                  | 824            | 1504         | 0           |            |          |     |
|                                         | Cas4                                | Conserved hypothetical protein                                            | 30                                                                                                  | 361                                  | 391            | 809          | 0           |            |          |     |
|                                         | Cas5                                | Fruiting body developmental protein S-like protein                        | 55                                                                                                  | 410                                  | 465            | 931          | 0           |            |          |     |
|                                         | Cas6                                | CRISPR-associated protein Cas6                                            | 108                                                                                                 | 303                                  | 411            | 714          | 0           |            |          |     |
|                                         | Cas6e                               | CRISPR-associated protein                                                 | 24                                                                                                  | 136                                  | 160            | 324          | 0           |            |          |     |
|                                         | Cas6f                               | CRISPR-associated protein, Csy4 family                                    | 13                                                                                                  | 67                                   | 80             | 176          | 0           |            |          |     |
|                                         | Cas7                                | CRISPR-associated protein, Csd2 family                                    | 96                                                                                                  | 413                                  | 509            | 959          | 0           |            |          |     |
|                                         | Cas8a1                              | Hypothetical protein Ise_0420                                             | 2                                                                                                   | 71                                   | 73             | 154          | 0           |            |          |     |
|                                         | Cas8a2                              | Hypothetical protein, conserved                                           | 1                                                                                                   | 12                                   | 13             | 25           | 0           |            |          |     |
|                                         | Cas8b                               | Conserved hypothetical protein                                            | 7                                                                                                   | 82                                   | 89             | 184          | 0           |            |          |     |
|                                         | Cas8c                               | CRISPR-associated protein, Csd1 family                                    | 26                                                                                                  | 191                                  | 217            | 441          | 0           |            |          |     |
|                                         | Cas9_Csn1                           | CRISPR-associated protein, Csn1 family                                    | 25                                                                                                  | 130                                  | 155            | 311          | 0           |            |          |     |
|                                         | Cmr1                                | CRISPR-associated RAMP protein, Cmr1 family                               | 4                                                                                                   | 87                                   | 91             | 181          | 0           |            |          |     |
|                                         | Cmr3                                | DNA repair (BRMP superfamily) family protein                              | 10                                                                                                  | 114                                  | 124            | 243          | 0           |            |          |     |
|                                         | Cmr4                                | CRISPR-associated RAMP protein, Cmr4 family                               | 8                                                                                                   | 113                                  | 121            | 240          | 0           |            |          |     |
|                                         | Cmr5                                | CRISPR-associated protein, Cmr5 family                                    | 6                                                                                                   | 78                                   | 84             | 163          | 0           |            |          |     |
|                                         | Cmr6                                | Predicted coding region AF_1861                                           | 11                                                                                                  | 97                                   | 108            | 207          | 0           |            |          |     |
|                                         | Csa5                                | CRISPR-associated protein, Cas5 family                                    | 0                                                                                                   | 18                                   | 18             | 37           | 0           |            |          |     |
|                                         | CsaX                                | Hypothetical protein S12641                                               | 0                                                                                                   | 5                                    | 5              | 10           | 0           |            |          |     |
|                                         | Csb1                                | Hypothetical protein AZL_037380                                           | 8                                                                                                   | 41                                   | 49             | 90           | 0           |            |          |     |
|                                         | Csb2                                | CRISPR-associated protein, GSU0054 family                                 | 10                                                                                                  | 31                                   | 41             | 72           | 0           |            |          |     |
|                                         | Csb3                                | NAD-dependent aldehyde dehydrogenase                                      | 0                                                                                                   | 8                                    | 8              | 18           | 0           |            |          |     |
|                                         | Csc1                                | Hypothetical protein LD85_0990                                            | 3                                                                                                   | 28                                   | 31             | 61           | 0           |            |          |     |
|                                         | Csc2                                | CRISPR-associated protein Csc2                                            | 3                                                                                                   | 30                                   | 33             | 63           | 0           |            |          |     |

|                                   |                                               |                     |                                                                                  |             |              |              |              |            |
|-----------------------------------|-----------------------------------------------|---------------------|----------------------------------------------------------------------------------|-------------|--------------|--------------|--------------|------------|
| Cse1                              | CRISPR-associated protein, Cse1 family        | 20                  | 194                                                                              | 214         | 458          | 0            |              |            |
| Cse2                              | CRISPR-associated protein, Cse2 family        | 13                  | 169                                                                              | 182         | 396          | 0            |              |            |
| Csf1                              | Hypothetical protein TK90_2701                | 1                   | 7                                                                                | 1           | 13           | 0            |              |            |
| Csf2                              | Hypothetical protein p18375                   | 0                   | 12                                                                               | 12          | 26           | 0            |              |            |
| Csf3                              | CRISPR-associated protein, Csf3 family        | 0                   | 6                                                                                | 6           | 12           | 0            |              |            |
| Csf4                              | DEAD/DEAH box helicase-like                   | 0                   | 4                                                                                | 4           | 8            | 0            |              |            |
| Csm2                              | CRISPR-associated protein, Csm2 family        | 5                   | 85                                                                               | 90          | 180          | 0            |              |            |
| Csm3                              | CRISPR-associated RAMP protein, Csm3 family   | 10                  | 108                                                                              | 118         | 234          | 0            |              |            |
| Csm4                              | CRISPR-associated Csm4 family protein         | 8                   | 76                                                                               | 84          | 162          | 0            |              |            |
| Csm5                              | CRISPR-associated RAMP protein, Csm5 family   | 6                   | 88                                                                               | 94          | 189          | 0            |              |            |
| Csm6                              | Hypothetical protein HMPREF9333_00225         | 9                   | 100                                                                              | 109         | 220          | 0            |              |            |
| Cox1                              | CRISPR-associated protein DvTHG motif protein | 9                   | 180                                                                              | 189         | 382          | 0            |              |            |
| Cox10                             | Cox10 family CRISPR-associated RAMP protein   | 0                   | 10                                                                               | 10          | 20           | 0            |              |            |
| Cox14                             | Hypothetical protein Gobsu_11505              | 1                   | 6                                                                                | 7           | 13           | 0            |              |            |
| Cox15                             | Hypothetical protein Cpha265_2052             | 0                   | 17                                                                               | 17          | 34           | 0            |              |            |
| Cox16                             | Hypothetical protein VVA1548                  | 2                   | 21                                                                               | 23          | 46           | 0            |              |            |
| Cox17                             | Hypothetical protein Btus_2683                | 6                   | 12                                                                               | 18          | 30           | 0            |              |            |
| Cox3                              | CRISPR-associated Csx3 family protein         | 1                   | 26                                                                               | 27          | 53           | 0            |              |            |
| Csy1                              | CRISPR-associated protein, Csy1 family        | 9                   | 57                                                                               | 66          | 142          | 0            |              |            |
| Csy2                              | Hypothetical protein HMPREF0178_02595         | 8                   | 56                                                                               | 64          | 126          | 0            |              |            |
| Csy3                              | CRISPR-associated protein, Csy3 family        | 9                   | 58                                                                               | 77          | 192          | 0            |              |            |
| <b>CRISPR Total</b>               |                                               | <b>1228</b>         | <b>6019</b>                                                                      | <b>7247</b> | <b>14066</b> | <b>0</b>     |              |            |
| <b>Environmental Toxins</b>       | <b>Microcystin/Nodularin</b>                  | McyB                | Non-ribosomal peptide synthetase module, adenylation domain (McyB)               | 2           | 2            | 4            | 7            | 0          |
|                                   |                                               | NdaA_mcyA           | Non-ribosomal peptide synthetase module, adenylation domain (McyA)               | 3           | 2            | 5            | 12           | 0          |
|                                   |                                               |                     |                                                                                  | <b>5</b>    | <b>4</b>     | <b>9</b>     | <b>19</b>    | <b>0</b>   |
|                                   | <b>Saxitoxin</b>                              | Saxitoxin_sxtA      | Polyketide synthase-related protein                                              | 2           | 1            | 3            | 54           | 0          |
|                                   |                                               | SxtH_T_Diox         | Phenylpropionate dioxygenase                                                     | 1           | 3            | 4            | 10           | 0          |
|                                   |                                               |                     |                                                                                  | <b>3</b>    | <b>4</b>     | <b>7</b>     | <b>64</b>    | <b>0</b>   |
|                                   |                                               |                     |                                                                                  | <b>8</b>    | <b>8</b>     | <b>16</b>    | <b>83</b>    | <b>0</b>   |
| <b>Environmental Toxins Total</b> |                                               |                     |                                                                                  | <b>8</b>    | <b>8</b>     | <b>16</b>    | <b>83</b>    | <b>0</b>   |
| <b>Microbial Defense Total</b>    |                                               |                     |                                                                                  | <b>3284</b> | <b>19954</b> | <b>23238</b> | <b>50070</b> | <b>683</b> |
| <b>Virulence</b>                  | <b>Adherence</b>                              | Aae                 | Autotransporter/adhesin Aae                                                      | 0           | 1            | 1            | 2            | 0          |
|                                   |                                               | Aap                 | Dispersin                                                                        | 0           | 1            | 1            | 2            | 0          |
|                                   |                                               | AatA                | AatA outer-membrane protein                                                      | 0           | 1            | 1            | 4            | 0          |
|                                   |                                               | AatC                | AatC, ATP binding protein of ABC transporter                                     | 0           | 2            | 2            | 4            | 0          |
|                                   |                                               | AatD                | AatD, apolipoprotein N-acyltransferase                                           | 0           | 3            | 3            | 6            | 0          |
|                                   |                                               | ActA                | Accessory colonization factor ActA                                               | 0           | 7            | 7            | 20           | 0          |
|                                   |                                               | ActB                | Accessory colonization factor ActB                                               | 0           | 1            | 1            | 2            | 0          |
|                                   |                                               | ActD                | Accessory colonization factor ActD precursor                                     | 1           | 9            | 10           | 26           | 0          |
|                                   |                                               | AggA                | Aggregative adherence fimbrial subunit AggA                                      | 1           | 0            | 1            | 1            | 0          |
|                                   |                                               | AggR                | Transcriptional activator AggR (AAF/I regulatory protein)                        | 0           | 1            | 1            | 2            | 0          |
|                                   |                                               | AidA                | Adhesin AidA (adhesin-involved-in-diffuse-adherence)                             | 1           | 2            | 3            | 5            | 0          |
|                                   |                                               | Ami                 | Autolysin; amidase                                                               | 0           | 1            | 1            | 2            | 0          |
|                                   |                                               | Asa                 | Aggregation substance Asa1                                                       | 0           | 1            | 1            | 2            | 0          |
|                                   |                                               | Bab                 | Adhesin-binding fucosylated histo-blood group antigen                            | 3           | 2            | 5            | 7            | 0          |
|                                   |                                               | BabB                | Adhesin-binding fucosylated histo-blood group antigen                            | 2           | 0            | 2            | 2            | 0          |
|                                   |                                               | Bad                 | Surface protein/Bartonella adhesin                                               | 0           | 6            | 6            | 16           | 0          |
|                                   |                                               | BfPA                | Prepilin-type domain protein                                                     | 0           | 6            | 6            | 12           | 0          |
|                                   |                                               | BfPB                | Outer membrane lipoprotein BfPB                                                  | 0           | 2            | 2            | 6            | 0          |
|                                   |                                               | BfPC                | Bundle forming pilus C                                                           | 0           | 1            | 1            | 4            | 0          |
|                                   |                                               | BfPD                | Bundle forming pilus D                                                           | 0           | 2            | 2            | 6            | 0          |
|                                   |                                               | BfPF                | Bundle forming pilus F                                                           | 0           | 1            | 1            | 4            | 0          |
|                                   |                                               | BfPL                | Inner membrane protein BfPL                                                      | 0           | 1            | 1            | 2            | 0          |
|                                   |                                               | BfPU                | Putative BfPU                                                                    | 0           | 1            | 1            | 4            | 0          |
|                                   |                                               | BfPW                | Putative protein perC (Protein bfpW) (fragment)                                  | 0           | 1            | 1            | 2            | 0          |
|                                   |                                               | CblA                | Cable Pili major subunit                                                         | 0           | 1            | 1            | 2            | 0          |
|                                   |                                               | CbpD                | Choline binding protein D                                                        | 1           | 1            | 2            | 3            | 0          |
|                                   |                                               | CbpE                | Choline binding protein E                                                        | 2           | 1            | 3            | 4            | 0          |
|                                   |                                               | CbpF                | Choline binding protein CbpF                                                     | 0           | 1            | 1            | 2            | 0          |
|                                   |                                               | Cif                 | Clumping factor A                                                                | 0           | 1            | 1            | 2            | 0          |
|                                   |                                               | Cmu                 | Hypothetical protein, conserved                                                  | 0           | 1            | 1            | 2            | 0          |
|                                   |                                               | Colonization_factor | Accessory colonization factor ActA                                               | 1           | 10           | 11           | 25           | 0          |
|                                   |                                               | CooA                | Adhesin major subunit pillin                                                     | 0           | 1            | 1            | 1            | 0          |
|                                   |                                               | Cpa135              | AI35 protein                                                                     | 2           | 1            | 3            | 4            | 0          |
|                                   |                                               | CpsN                | Putative LPS biosynthesis related glycosyltransferase                            | 0           | 1            | 1            | 2            | 0          |
|                                   |                                               | CsfA                | CS5 fimbrial minor pillin subunit                                                | 1           | 2            | 3            | 7            | 0          |
|                                   |                                               | CsxC                | Chaperone protein CsxC                                                           | 0           | 2            | 2            | 18           | 0          |
|                                   |                                               | Dg                  | Delta giardin                                                                    | 1           | 0            | 1            | 1            | 0          |
|                                   |                                               | Eae                 | Intimin                                                                          | 2           | 6            | 8            | 26           | 0          |
|                                   |                                               | EbpS                | Cell surface elastin binding protein EbpS                                        | 0           | 1            | 1            | 2            | 0          |
|                                   |                                               | Efa1                | Putative cytotoxin                                                               | 0           | 1            | 1            | 6            | 0          |
|                                   |                                               | EfaA                | Endocarditis specific antigen                                                    | 0           | 1            | 1            | 2            | 0          |
|                                   |                                               | EmaA                | Extracellular matrix protein adhesin A                                           | 2           | 4            | 6            | 10           | 0          |
|                                   |                                               | Esp                 | Putative enterococcal surface protein                                            | 1           | 0            | 1            | 1            | 0          |
|                                   |                                               | Fap1                | PF repeat family protein                                                         | 1           | 0            | 1            | 1            | 0          |
|                                   |                                               | FbsA                | Fruit-body specific gene A                                                       | 1           | 0            | 1            | 1            | 0          |
|                                   |                                               | Fimbrae             | K88 fimbrial protein AC precursor                                                | 3           | 5            | 8            | 50           | 0          |
|                                   |                                               | FimF                | Fimbrial subunit FimF                                                            | 0           | 3            | 3            | 6            | 0          |
|                                   |                                               | FimG                | Putative protein FimG                                                            | 0           | 10           | 10           | 20           | 0          |
|                                   |                                               | FimH                | Fimbrial adhesin FimH                                                            | 0           | 8            | 8            | 18           | 0          |
|                                   |                                               | FimJ                | Type 4 fimbrial biogenesis protein (FimJ)                                        | 0           | 5            | 5            | 12           | 0          |
|                                   |                                               | FocG                | f1C Minor fimbrial subunit protein G precursor                                   | 1           | 0            | 1            | 1            | 0          |
|                                   |                                               | GapA                | Cytadhesin protein GapA                                                          | 1           | 0            | 1            | 1            | 0          |
|                                   |                                               | Gasp180             | Axoneme-associated protein GASP-180                                              | 9           | 2            | 11           | 11           | 0          |
|                                   |                                               | Gg                  | Gamma giardin                                                                    | 0           | 1            | 1            | 1            | 0          |
|                                   |                                               | Gp60                | 60 kDa glycoprotein                                                              | 2           | 4            | 6            | 19           | 0          |
|                                   |                                               | HfA                 | Major fimbria subunit                                                            | 1           | 3            | 4            | 8            | 0          |
|                                   |                                               | HfB                 | Chaperone protein HfB                                                            | 0           | 4            | 4            | 10           | 0          |
|                                   |                                               | HfC                 | Outer membrane usher protein hfC precursor                                       | 0           | 2            | 2            | 4            | 0          |
|                                   |                                               | HfE                 | Minor fimbrial subunit hfe/Minor pillin tip adhesin                              | 0           | 5            | 5            | 28           | 0          |
|                                   |                                               | Hmw                 | HMW1A, high molecular weight adhesin 1                                           | 0           | 3            | 3            | 6            | 0          |
|                                   |                                               | Hmw1C               | HMW1C, putative glycosyltransferase involved in glycosylation of HMW1A and HMW2A | 0           | 1            | 1            | 2            | 0          |
|                                   |                                               | Hmw2A               | HMW2A, high molecular weight adhesin 2                                           | 0           | 2            | 2            | 4            | 0          |
|                                   |                                               | HopZ                | Helicobacter outer membrane protein                                              | 0           | 1            | 1            | 2            | 0          |
|                                   |                                               | IcaC                | Intercellular adhesion protein C/Biofilm PIA synthesis protein IcaC              | 1           | 2            | 3            | 5            | 0          |
|                                   |                                               | IcaD                | Intercellular adhesion protein D                                                 | 0           | 1            | 1            | 2            | 0          |
|                                   |                                               | IcaR                | Intercellular adhesion regulator                                                 | 0           | 2            | 2            | 4            | 0          |
|                                   |                                               | JlpA                | Jejunum lipoprotein                                                              | 0           | 1            | 1            | 2            | 0          |
|                                   |                                               | Lectin170           | Galactose-specific adhesin                                                       | 6           | 1            | 7            | 8            | 0          |
|                                   |                                               | Lgl3                | Galactose-inhibitable lectin 35 kDa subunit precursor, putative                  | 5           | 1            | 6            | 6            | 0          |
|                                   |                                               | LngA                | Longus pilus structural subunit                                                  | 1           | 1            | 2            | 12           | 0          |
|                                   |                                               | LpfA                | Putative major fimbrial subunit                                                  | 2           | 3            | 5            | 8            | 0          |
|                                   |                                               | LpfB                | Putative fimbrial chaperone protein                                              | 0           | 6            | 6            | 12           | 0          |
|                                   |                                               | LpfC                | Outer membrane usher protein lpfC                                                | 2           | 10           | 12           | 22           | 0          |
|                                   |                                               | LpfD                | Predicted fimbrial protein precursor                                             | 0           | 3            | 3            | 11           | 0          |
|                                   |                                               | LpfE                | Predicted fimbrial protein precursor                                             | 0           | 2            | 2            | 4            | 0          |
|                                   |                                               | Mic1                | Microneme 1-like protein                                                         | 0           | 1            | 1            | 8            | 0          |
|                                   |                                               | Mst101              | Axoneme-associated protein mst101, putative                                      | 0           | 2            | 2            | 4            | 0          |
|                                   |                                               | NanA                | N-Acetylneuraminidase                                                            | 2           | 3            | 5            | 8            | 0          |



|           |                                                                               |            |            |             |             |          |
|-----------|-------------------------------------------------------------------------------|------------|------------|-------------|-------------|----------|
| NanB      | Sialidase B/Neuraminidase B                                                   | 0          | 1          | 1           | 2           | 0        |
| Osp       | Opacity associated protein OapA                                               | 0          | 5          | 5           | 24          | 0        |
| OmpA      | Outer membrane protein P5                                                     | 0          | 4          | 4           | 8           | 0        |
| OpcA      | Outer membrane protein OpcA                                                   | 1          | 4          | 5           | 41          | 0        |
| OspA      | Outer surface protein A                                                       | 5          | 4          | 9           | 25          | 0        |
| OspE1     | Outer surface protein OspE1                                                   | 0          | 1          | 1           | 2           | 0        |
| P1        | MgPa adhesin                                                                  | 4          | 2          | 6           | 8           | 0        |
| Pap       | Autotransporter adhesin                                                       | 3          | 41         | 44          | 118         | 0        |
| PapA      | Major pilin protein PapA/Mating-type-like protein A1/MTL1 protein             | 2          | 3          | 5           | 18          | 0        |
| PapB      | Major pilus subunit operon regulatory protein PapB                            | 2          | 14         | 16          | 43          | 0        |
| PapF      | P pilus minor tip component PapF                                              | 0          | 1          | 1           | 2           | 0        |
| PapG      | P pilus adhesin PapG protein                                                  | 1          | 2          | 3           | 9           | 0        |
| PapH      | Minor pilin protein PapH                                                      | 0          | 1          | 1           | 2           | 0        |
| Pe35      | PE family protein, PE35                                                       | 0          | 1          | 1           | 2           | 0        |
| Peb1C     | AIBC transporter ATP-binding protein PEb1C                                    | 0          | 2          | 2           | 4           | 0        |
| Peb2      | Major antigenic peptide PEB2                                                  | 0          | 1          | 1           | 2           | 0        |
| Peb3      | Major antigenic peptide PEB3                                                  | 1          | 1          | 2           | 3           | 0        |
| Peb4      | Major antigenic peptide/PpIC-type peptidyl-prolyl cis-trans isomerase         | 0          | 1          | 1           | 2           | 0        |
| PefA      | Major fimbrial antigen subunit pefA                                           | 0          | 1          | 1           | 2           | 0        |
| PeiB      | Adhesion biosynthesis transcription regulatory protein                        | 0          | 1          | 1           | 10          | 0        |
| PeiC      | Fimbrial outer membrane usher protein PeiC                                    | 1          | 2          | 3           | 5           | 0        |
| Pertactin | Pertactin family virulence factor/autotransporter                             | 0          | 6          | 6           | 12          | 0        |
| PEEMP3    | Erythrocyte membrane protein PEEMP3, putative                                 | 3          | 1          | 4           | 5           | 0        |
| Phist     | Phist protein (PF-fam-b)                                                      | 15         | 9          | 24          | 31          | 0        |
| PilC1     | Type IV pilus-associated protein PilC1                                        | 1          | 0          | 1           | 1           | 0        |
| PilC2     | Type IV pilus-associated protein PilC2                                        | 0          | 1          | 1           | 9           | 0        |
| Pilin     | MSHA pilin protein MshA                                                       | 359        | 484        | 523         | 1076        | 0        |
| PIIY2     | Type 4 fimbrial biogenesis protein PIIY2                                      | 0          | 1          | 1           | 2           | 0        |
| PrgB      | Aggregation substance PrgB                                                    | 0          | 1          | 1           | 2           | 0        |
| Prt       | UDP-glucose 4-epimerase                                                       | 1          | 3          | 4           | 7           | 0        |
| PsaB      | Chaperone protein PsaB                                                        | 0          | 1          | 1           | 2           | 0        |
| PsaC      | Outer membrane usher protein psac                                             | 0          | 12         | 12          | 24          | 0        |
| RatB      | Putative outer membrane protein                                               | 0          | 4          | 4           | 11          | 0        |
| RcpB      | Rough colony protein B                                                        | 0          | 3          | 3           | 6           | 0        |
| RcpC      | Flp pilus assembly protein RcpC/CpaB                                          | 0          | 2          | 2           | 4           | 0        |
| Rhamm     | Hyaluronan mediated motility receptor                                         | 0          | 1          | 1           | 2           | 0        |
| Rif       | RIFIN                                                                         | 153        | 18         | 171         | 184         | 0        |
| RrgB      | Pilus subunit RrgB                                                            | 0          | 3          | 3           | 8           | 0        |
| Sab       | Outer membrane protein                                                        | 0          | 1          | 1           | 2           | 0        |
| SagF      | Streptolysin S biosynthesis protein SagF                                      | 1          | 0          | 1           | 1           | 0        |
| SagH      | Streptolysin S export transmembrane protein/ATP-binding/permease protein SagH | 1          | 0          | 1           | 1           | 0        |
| SagI      | Streptolysin S export transmembrane protein SagI                              | 1          | 0          | 1           | 1           | 0        |
| Salp1     | SALP-1                                                                        | 1          | 0          | 1           | 1           | 0        |
| ScpB      | CSA peptidase precursor Scp2                                                  | 3          | 13         | 16          | 29          | 0        |
| SdaA      | SdaA protein                                                                  | 0          | 2          | 2           | 6           | 0        |
| SdrD      | Ser-Asp rich fibrinogen/bone sialoprotein-binding protein SdrD                | 0          | 1          | 1           | 2           | 0        |
| SfaA      | S-fimbrial protein subunit precursor                                          | 0          | 1          | 1           | 4           | 0        |
| ShdA      | AIDA autotransporter-like protein ShdA                                        | 0          | 2          | 2           | 9           | 0        |
| Srt       | Sortase                                                                       | 8          | 118        | 126         | 373         | 0        |
| SrtC2     | Sortase SrtC2                                                                 | 0          | 1          | 1           | 2           | 0        |
| TadV      | Pepilysin peptidase/Type IV leader peptidase family/Peptidase A24             | 1          | 4          | 5           | 11          | 0        |
| TadZ      | Flp pilus assembly protein, ATPase CpaE                                       | 2          | 13         | 15          | 29          | 0        |
| Tcp       | Toxin co-regulated pilin                                                      | 2          | 0          | 2           | 2           | 0        |
| TcpF      | Toxin co-regulated pilus biosynthesis protein F                               | 2          | 1          | 3           | 4           | 0        |
| TcpQ      | Toxin coregulated pilus biosynthesis protein TcpQ/TcpQ                        | 0          | 1          | 1           | 2           | 0        |
| TopJ      | Terminal organelle assembly protein TopJ                                      | 0          | 1          | 1           | 6           | 0        |
| Tsp       | CpTSP6 extracellular membrane-associated protein                              | 0          | 1          | 1           | 2           | 0        |
| UspA1     | Ubiquitous surface protein A1 UspA1                                           | 15         | 7          | 22          | 36          | 0        |
| VompA     | Surface protein/Bartonella adhesin                                            | 0          | 2          | 2           | 4           | 0        |
| YagW      | YagW                                                                          | 0          | 1          | 1           | 2           | 0        |
| YkgK      | Putative HTH-type transcriptional regulator YkgK                              | 0          | 1          | 1           | 2           | 0        |
|           | <b>Adherence Total</b>                                                        | <b>310</b> | <b>999</b> | <b>1329</b> | <b>2833</b> | <b>0</b> |

|          |       |                                                                     |    |    |    |     |   |
|----------|-------|---------------------------------------------------------------------|----|----|----|-----|---|
| Invasion | ActA  | Actin-assembly inducing protein                                     | 3  | 3  | 3  | 0   |   |
|          | Adp   | Alanyl dipeptidyl peptidase                                         | 4  | 2  | 6  | 8   | 0 |
|          | Ag1   | Ag-1 blood stage membrane protein                                   | 2  | 0  | 2  | 2   | 0 |
|          | Ail   | Attachment invasion locus protein                                   | 1  | 9  | 10 | 21  | 0 |
|          | Ams1  | Apical membrane antigen 1                                           | 10 | 12 | 22 | 405 | 0 |
|          | Bca   | C protein alpha-antigen                                             | 0  | 2  | 2  | 4   | 0 |
|          | Cia   | Invasion antigen B                                                  | 2  | 4  | 6  | 10  | 0 |
|          | CloSI | Alpha-clostripain                                                   | 0  | 1  | 1  | 2   | 0 |
|          | Enh   | Enhanced entry protein EnhA                                         | 0  | 13 | 13 | 35  | 0 |
|          | EnhB  | Hypothetical protein, weakly similar to enhanced entry protein EnhB | 0  | 2  | 2  | 6   | 0 |
|          | EnhC  | Enhanced entry protein EnhC                                         | 0  | 4  | 4  | 10  | 0 |
|          | EcpP  | Predicted serine protease EcpP                                      | 0  | 1  | 1  | 2   | 0 |
|          | HysA  | Polyaccharide lyase family 8, super-sandwich domain protein         | 0  | 1  | 1  | 2   | 0 |
|          | IbcC  | Membrane protein YjJP                                               | 0  | 2  | 2  | 24  | 0 |
|          | Icp2  | Amoebiasin 2 precursor                                              | 0  | 1  | 1  | 2   | 0 |
|          | IcpP  | Protease VII                                                        | 4  | 0  | 4  | 4   | 0 |
|          | IgA1  | IgA1 protease                                                       | 7  | 22 | 29 | 62  | 0 |
|          | IntE  | Internalin E                                                        | 1  | 0  | 1  | 1   | 0 |
|          | Inv   | Invasion protein                                                    | 5  | 22 | 27 | 71  | 0 |
|          | InvF  | Invasion regulatory protein                                         | 0  | 3  | 3  | 6   | 0 |
|          | InvG  | Outer membrane invasion protein/Secretory protein                   | 0  | 3  | 3  | 6   | 0 |
|          | InvH  | Cell adherence/invasion protein                                     | 0  | 1  | 1  | 2   | 0 |
|          | Las   | LASa protease precursor                                             | 0  | 6  | 6  | 14  | 0 |
|          | LasB  | Elastase LasB                                                       | 0  | 2  | 2  | 4   | 0 |
|          | Mf    | Mitogenic factor - phage associated                                 | 0  | 1  | 1  | 2   | 0 |
|          | Mpl   | Zinc metalloproteinase (elastase)                                   | 1  | 0  | 1  | 1   | 0 |
|          | Msp1  | Merozoite surface protein 1                                         | 14 | 14 | 28 | 529 | 0 |
|          | Nag   | Hyaluronidase                                                       | 0  | 1  | 1  | 2   | 0 |
|          | NanI  | Exo-alpha-sialidase                                                 | 0  | 1  | 1  | 2   | 0 |
|          | NanJ  | Hypothetical protein CLONEX_02961                                   | 0  | 1  | 1  | 2   | 0 |
|          | OrgA  | Oxygen-regulated invasion protein; cell invasion protein            | 0  | 1  | 1  | 2   | 0 |
|          | PicA  | Phosphatidylinositol-specific phospholipase C                       | 1  | 0  | 1  | 1   | 0 |
|          | PicB  | Zinc dependent phospholipase C                                      | 2  | 0  | 2  | 2   | 0 |
|          | Ptp1  | Polar tube protein Ptp1                                             | 1  | 0  | 1  | 1   | 0 |
|          | Ptp2  | Polar tube protein 2                                                | 2  | 3  | 5  | 8   | 0 |
|          | Ptp3  | Polar tube protein 3                                                | 1  | 1  | 2  | 3   | 0 |
|          | Rama  | Rhoptry associated membrane antigen                                 | 2  | 0  | 2  | 2   | 0 |
|          | Rap1  | Rhoptry associated protein 1                                        | 1  | 2  | 3  | 5   | 0 |
|          | Ron2  | Rhoptry neck protein 2                                              | 1  | 1  | 2  | 3   | 0 |
|          | Rop16 | Rhoptry protein 16                                                  | 0  | 1  | 1  | 4   | 0 |
|          | Rop5  | Rhoptry protein 5B                                                  | 0  | 1  | 1  | 5   | 0 |
|          | Sak   | Plasminogen activator                                               | 1  | 0  | 1  | 1   | 0 |
|          | Sda   | Deoxyribonuclease precursor                                         | 0  | 3  | 3  | 13  | 0 |
|          | Ska   | Streptokinase                                                       | 2  | 0  | 2  | 2   | 0 |
|          | StcE  | Metalloprotease StcE                                                | 0  | 1  | 1  | 2   | 0 |
|          | Tsh   | Temperature-sensitive hemagglutinin tsh                             | 1  | 3  | 4  | 7   | 0 |

|                                   |                             | ZmpA                                                                                              | ZmpA -like peptidase, Metallo peptidase, MEROPS family M04             | 0          | 1          | 2           | 0           |            |
|-----------------------------------|-----------------------------|---------------------------------------------------------------------------------------------------|------------------------------------------------------------------------|------------|------------|-------------|-------------|------------|
| <b>Invasion Total</b>             |                             |                                                                                                   |                                                                        | <b>69</b>  | <b>149</b> | <b>218</b>  | <b>1307</b> |            |
| <b>Cellular components</b>        | <b>Cell wall</b>            | EsaA                                                                                              | Spore coat assembly protein esaA                                       | 0          | 3          | 3           | 10          |            |
|                                   |                             | FadD28                                                                                            | Acyl-CoA synthetase                                                    | 1          | 1          | 2           | 3           |            |
|                                   |                             | MmaA1                                                                                             | Methoxy mycolic acid synthase 1                                        | 2          | 1          | 3           | 4           |            |
|                                   |                             | MmaA2                                                                                             | Methoxy mycolic acid synthase 2 MmaA2_1                                | 1          | 1          | 2           | 3           |            |
|                                   |                             | MmaA3                                                                                             | Methoxy mycolic acid synthase 3, MmaA3                                 | 1          | 0          | 1           | 1           |            |
|                                   |                             | OmpD                                                                                              | Outer membrane porin protein ompD                                      | 3          | 4          | 7           | 11          |            |
|                                   | Swp1                        | Spore wall protein 1                                                                              | 1                                                                      | 0          | 1          | 1           |             |            |
|                                   | <b>Cell Wall Total</b>      |                                                                                                   |                                                                        |            | <b>9</b>   | <b>10</b>   | <b>19</b>   | <b>33</b>  |
|                                   | <b>Cyst wall</b>            | Art                                                                                               | Articulin family protein                                               | 1          | 1          | 2           | 3           |            |
|                                   |                             | Cowp                                                                                              | Oocyst wall protein                                                    | 5          | 8          | 13          | 22          |            |
|                                   |                             | Cwp1                                                                                              | Cyst wall protein 1                                                    | 1          | 0          | 1           | 1           |            |
|                                   |                             | Cwp2                                                                                              | Cyst wall protein 3                                                    | 4          | 0          | 4           | 4           |            |
|                                   | Jacob                       | Cyst wall-specific glycoprotein Jacob family protein                                              | 2                                                                      | 7          | 9          | 17          |             |            |
| <b>Cyst Wall Total</b>            |                             |                                                                                                   |                                                                        | <b>13</b>  | <b>16</b>  | <b>29</b>   | <b>47</b>   |            |
| <b>Spore</b>                      | Hswp                        | Hypothetical spore wall protein                                                                   | 6                                                                      | 0          | 6          | 6           |             |            |
|                                   | <b>Spore Total</b>          |                                                                                                   |                                                                        |            | <b>6</b>   | <b>0</b>    | <b>6</b>    | <b>6</b>   |
| <b>Cellular Components Total</b>  |                             |                                                                                                   |                                                                        | <b>28</b>  | <b>26</b>  | <b>54</b>   | <b>86</b>   |            |
| <b>Cellular Function</b>          | <b>Mitosis</b>              | Cald                                                                                              | Caldesmon, putative                                                    | 4          | 5          | 9           | 14          |            |
|                                   |                             | <b>Mitosis Total</b>                                                                              |                                                                        |            |            | <b>4</b>    | <b>5</b>    | <b>9</b>   |
|                                   | <b>Cellular metabolism</b>  | Ben_bclA                                                                                          | Benzoate-CoA ligase family                                             | 44         | 192        | 236         | 422         |            |
|                                   |                             | LgtA                                                                                              | Lacto-N-neotetraose biosynthesis glycosyl transferase LgtA             | 0          | 4          | 4           | 8           |            |
|                                   |                             | nap                                                                                               | Neutrophil activating protein                                          | 0          | 13         | 13          | 26          |            |
|                                   |                             | NarX                                                                                              | Nitrate reductase narX                                                 | 1          | 0          | 1           | 1           |            |
|                                   |                             | <b>Cellular Metabolism Total</b>                                                                  |                                                                        |            |            | <b>45</b>   | <b>209</b>  | <b>254</b> |
|                                   | <b>Nutrient acquisition</b> | Ccm                                                                                               | Putative Redoxin family protein                                        | 0          | 4          | 4           | 12          |            |
|                                   |                             | ChuA                                                                                              | Outer membrane hemein receptor ChuA                                    | 1          | 7          | 8           | 15          |            |
|                                   |                             | ChuS                                                                                              | Putative heme/hemoglobin transport protein                             | 0          | 3          | 3           | 6           |            |
|                                   |                             | ChuT                                                                                              | Putative periplasmic binding protein (putative hemein binding protein) | 0          | 2          | 2           | 4           |            |
|                                   |                             | ChuU                                                                                              | Putative iron compound ABC transporter, permease protein               | 1          | 0          | 1           | 1           |            |
|                                   |                             | ChuW                                                                                              | Coproporphyrinogen III oxidase                                         | 1          | 5          | 6           | 13          |            |
| Fco                               |                             | Ferrous iron transporter B                                                                        | 0                                                                      | 4          | 4          | 8           |             |            |
| FptA                              |                             | Fe(II)-pyochelin receptor precursor                                                               | 1                                                                      | 1          | 2          | 3           |             |            |
| FreB                              |                             | FreB protein                                                                                      | 4                                                                      | 5          | 9          | 13          |             |            |
| FrgA                              |                             | Putative siderophore biosynthesis protein                                                         | 0                                                                      | 1          | 1          | 2           |             |            |
| Hgp                               |                             | Hemoglobin binding protein A                                                                      | 0                                                                      | 1          | 1          | 2           |             |            |
| Hhu                               |                             | Hemoglobin and hemoglobin-haptoglobin binding protein                                             | 3                                                                      | 9          | 12         | 23          |             |            |
| HxuA                              |                             | Heme-hemopexin utilization protein A                                                              | 0                                                                      | 4          | 4          | 8           |             |            |
| HxuB                              |                             | Heme/hemopexin-binding protein B, hemolysin activation/secretion protein                          | 0                                                                      | 4          | 4          | 12          |             |            |
| HxuC                              |                             | heme-hemopexin utilization protein C                                                              | 0                                                                      | 8          | 8          | 21          |             |            |
| Icl                               |                             | Iso citrate lyase icl                                                                             | 1                                                                      | 0          | 1          | 1           |             |            |
| IrgA                              |                             | Small-molecule methyltransferase IrgA                                                             | 0                                                                      | 2          | 2          | 4           |             |            |
| IrgB                              |                             | Iron-regulated virulence regulatory protein IrgB                                                  | 0                                                                      | 5          | 5          | 16          |             |            |
| Iro                               |                             | Outer membrane ferric siderophore receptor                                                        | 40                                                                     | 382        | 422        | 858         |             |            |
| IroC                              |                             | ABC transporter, ATP-binding protein                                                              | 1                                                                      | 0          | 1          | 1           |             |            |
| IsoA                              |                             | Iron (Fe2+)-regulated surface determinant protein IsoA                                            | 0                                                                      | 1          | 1          | 2           |             |            |
| IsoC                              |                             | Iron transport associated protein                                                                 | 1                                                                      | 6          | 7          | 29          |             |            |
| Iuc                               |                             | Aerobactin biosynthesis protein                                                                   | 3                                                                      | 60         | 63         | 156         |             |            |
| IutA                              |                             | Aerobactin siderophore receptor IutA                                                              | 1                                                                      | 16         | 17         | 37          |             |            |
| MbtA                              |                             | Putative BIFUNCTIONAL ENZYME MBTA: SALICYL-AMP LIGASE (SAL-AMP LIGASE) + SALICYL-S-ACP SYNTHETASE | 1                                                                      | 1          | 2          | 3           |             |            |
| MbtB                              |                             | Phenylloxazine synthase MbtB                                                                      | 1                                                                      | 0          | 1          | 1           |             |            |
| MbtD                              |                             | Polyketide synthetase mbtD                                                                        | 0                                                                      | 1          | 1          | 2           |             |            |
| MbtE                              |                             | Non-ribosomal peptide synthetase MbTE                                                             | 1                                                                      | 3          | 4          | 7           |             |            |
| MbtF                              |                             | Mycobactin biosynthesis peptide synthetase MbtF                                                   | 1                                                                      | 2          | 3          | 5           |             |            |
| MbtG                              |                             | Lysine-N-oxygenase MbtG                                                                           | 0                                                                      | 1          | 1          | 1           |             |            |
| MceS3                             |                             | Mce family protein                                                                                | 2                                                                      | 4          | 6          | 10          |             |            |
| MirB                              |                             | Siderophore iron transporter mirB                                                                 | 21                                                                     | 9          | 30         | 37          |             |            |
| NpgA                              |                             | 4'-Phosphopantetheinyl transferase NpgA                                                           | 4                                                                      | 7          | 11         | 18          |             |            |
| OrbA                              |                             | Ornibactin receptor OrbA                                                                          | 0                                                                      | 1          | 1          | 2           |             |            |
| SreA                              |                             | Siderophore transcription factor SreA                                                             | 5                                                                      | 1          | 6          | 7           |             |            |
| Tbpa                              |                             | Probable transferrin binding protein 1 precursor                                                  | 1                                                                      | 0          | 1          | 1           |             |            |
| <b>Nutrient Acquisition Total</b> |                             |                                                                                                   |                                                                        | <b>96</b>  | <b>559</b> | <b>655</b>  | <b>1341</b> |            |
| <b>Regulation</b>                 |                             | Arid1                                                                                             | ARID1 AT-rich interaction domain protein                               | 1          | 0          | 1           | 1           |            |
|                                   |                             | Arid2                                                                                             | ARID2 AT-rich interaction domain protein                               | 1          | 0          | 1           | 1           |            |
|                                   |                             | Bos1                                                                                              | Two-component osmosensing histidine kinase (Bos1)                      | 1          | 3          | 4           | 7           |            |
|                                   | BwrR                        | Two component transcriptional regulator, winged helix family                                      | 0                                                                      | 3          | 3          | 6           |             |            |
|                                   | CovR                        | Response regulator protein                                                                        | 0                                                                      | 1          | 1          | 2           |             |            |
|                                   | CovS                        | Sensor histidine kinase                                                                           | 0                                                                      | 1          | 1          | 2           |             |            |
|                                   | CqsS                        | Cholerae quorum sensing sensor                                                                    | 0                                                                      | 8          | 8          | 18          |             |            |
|                                   | DevR                        | Two component transcriptional regulatory protein devR                                             | 0                                                                      | 1          | 1          | 2           |             |            |
|                                   | DevS                        | Two component sensor histidine kinase DevS                                                        | 1                                                                      | 1          | 2          | 3           |             |            |
|                                   | Glp                         | GARP-like protein 3                                                                               | 7                                                                      | 1          | 8          | 10          |             |            |
|                                   | GrlA                        | Putative LEE-encoded positive regulator of transcription                                          | 0                                                                      | 1          | 1          | 2           |             |            |
|                                   | HapB                        | CCAAT-binding transcription factor subunit HAPB                                                   | 2                                                                      | 5          | 7          | 12          |             |            |
|                                   | HapC                        | CCAAT-binding factor complex subunit HapC                                                         | 4                                                                      | 0          | 4          | 4           |             |            |
|                                   | HapX                        | bZIP transcription factor HapX                                                                    | 6                                                                      | 9          | 15         | 26          |             |            |
|                                   | Hfq                         | RNA-binding protein Hfq                                                                           | 9                                                                      | 43         | 52         | 101         |             |            |
|                                   | LasR                        | Transcriptional activator protein LasR                                                            | 0                                                                      | 2          | 2          | 4           |             |            |
|                                   | Ler                         | Ler DNA-binding protein H-NS                                                                      | 0                                                                      | 1          | 1          | 2           |             |            |
|                                   | LetS                        | Legionella transmission sensor LetS                                                               | 0                                                                      | 2          | 2          | 4           |             |            |
|                                   | ModS                        | ModS protein-sorting protein                                                                      | 0                                                                      | 5          | 5          | 12          |             |            |
|                                   | MprA                        | Two component transcriptional regulator, winged helix family                                      | 0                                                                      | 1          | 1          | 2           |             |            |
|                                   | PhcA                        | PhcA                                                                                              | 2                                                                      | 3          | 5          | 14          |             |            |
|                                   | Rpn2p                       | 19S/PA700 proteasome regulatory particle subunit Rpn2p/S2                                         | 0                                                                      | 7          | 7          | 44          |             |            |
|                                   | RsaL                        | Virulence gene repressor RsaL                                                                     | 4                                                                      | 0          | 4          | 4           |             |            |
|                                   | SaeR                        | Response regulator SaeR                                                                           | 1                                                                      | 18         | 19         | 48          |             |            |
|                                   | SarA                        | Transcriptional regulator SarA                                                                    | 2                                                                      | 3          | 5          | 9           |             |            |
|                                   | VirF                        | Virulence regulon transcriptional activator VirF                                                  | 1                                                                      | 2          | 3          | 5           |             |            |
| <b>Regulation Total</b>           |                             |                                                                                                   |                                                                        | <b>42</b>  | <b>121</b> | <b>163</b>  | <b>345</b>  |            |
| <b>Quorum sensing</b>             | HapR                        | Quorum-sensing regulator of virulence HapR                                                        | 0                                                                      | 4          | 4          | 8           |             |            |
|                                   | <b>Quorum Sensing Total</b> |                                                                                                   |                                                                        |            | <b>0</b>   | <b>4</b>    | <b>4</b>    | <b>8</b>   |
| <b>Cellular Function Total</b>    |                             |                                                                                                   |                                                                        | <b>187</b> | <b>898</b> | <b>1085</b> | <b>2165</b> |            |
| <b>Immune evasion</b>             | <b>Antiphagocytosis</b>     | Alg                                                                                               | Type IV pilus assembly PilZ                                            | 2          | 7          | 9           | 18          |            |
|                                   |                             | AlgB                                                                                              | Two component, sigma54 specific, Fis family transcriptional regulator  | 1          | 9          | 10          | 26          |            |
|                                   |                             | AlgE                                                                                              | Alginate biosynthesis protein AlgE                                     | 0          | 6          | 6           | 18          |            |
|                                   |                             | AlgF                                                                                              | Alginate O-acetyltransferase                                           | 0          | 4          | 4           | 8           |            |
|                                   |                             | AlgG                                                                                              | Alginate C5-mannuronan-epimerase AlgG                                  | 0          | 3          | 3           | 6           |            |
|                                   |                             | AlgK                                                                                              | Alginate biosynthesis protein AlgK                                     | 2          | 7          | 9           | 18          |            |
|                                   |                             | AlgX                                                                                              | Alginate biosynthesis protein AlgX                                     | 1          | 4          | 5           | 11          |            |
|                                   |                             | Aur                                                                                               | Aureolysin                                                             | 0          | 3          | 3           | 6           |            |
|                                   |                             | Cap1R                                                                                             | F1 operon positive regulatory protein                                  | 0          | 1          | 1           | 2           |            |
|                                   |                             | Cap                                                                                               | Capsule polysaccharide modification protein LipA                       | 23         | 182        | 205         | 410         |            |
|                                   |                             | Cap5A                                                                                             | Putative capsular polysaccharide synthesis enzyme Cap5A                | 0          | 2          | 2           | 4           |            |
|                                   |                             | Cap8B                                                                                             | Type 8 capsule gene Cap8B                                              | 0          | 1          | 1           | 2           |            |
|                                   |                             | Cap8E                                                                                             | Capsular polysaccharide synthesis enzyme Cap8E                         | 0          | 1          | 1           | 2           |            |
|                                   |                             | Cap8M                                                                                             | Sugar transferase                                                      | 0          | 2          | 2           | 4           |            |
|                                   |                             | CtrA                                                                                              | Capsule polysaccharide export outer membrane protein CtrA              | 0          | 2          | 2           | 4           |            |

|                      |                             |                                                                                             |                                                         |            |            |            |          |   |
|----------------------|-----------------------------|---------------------------------------------------------------------------------------------|---------------------------------------------------------|------------|------------|------------|----------|---|
|                      | CtrB                        | Polysialic acid capsule export inner-membrane protein CtrB                                  | 0                                                       | 3          | 3          | 14         | 0        |   |
|                      | CtrC                        | Putative capsule polysaccharide export inner-membrane protein ctrC                          | 0                                                       | 5          | 5          | 10         | 0        |   |
|                      | Lip                         | Manganese peroxidase 5                                                                      | 28                                                      | 15         | 43         | 63         | 0        |   |
|                      | LipB                        | Capsule polysaccharide modification protein LipB                                            | 0                                                       | 2          | 2          | 6          | 0        |   |
|                      | Mimp                        | 24 kDa macrophage-induced major protein                                                     | 0                                                       | 2          | 2          | 5          | 0        |   |
|                      | SiaB                        | Capsule biosynthesis protein SiaB                                                           | 0                                                       | 1          | 1          | 2          | 0        |   |
|                      | SiaC                        | Sialic acid synthase                                                                        | 0                                                       | 3          | 3          | 6          | 0        |   |
|                      | SiaD                        | Sialyltransferase                                                                           | 0                                                       | 1          | 1          | 2          | 0        |   |
|                      |                             | <i>Antiphagocytosis Total</i>                                                               | <i>57</i>                                               | <i>266</i> | <i>323</i> | <i>647</i> | <i>0</i> |   |
|                      | Intracellular survival      | Cgs                                                                                         | Enhanced intracellular survival protein                 | 1          | 0          | 1          | 0        |   |
|                      |                             | IglA                                                                                        | Intracellular growth locus, subunit A, putative         | 0          | 1          | 1          | 2        | 0 |
|                      |                             | IglB                                                                                        | Intracellular growth locus, subunit B                   | 0          | 1          | 1          | 2        | 0 |
|                      |                             | PdpD                                                                                        | Pathogenicity determinant protein D                     | 0          | 1          | 1          | 2        | 0 |
|                      |                             | <i>Intracellular Survival Total</i>                                                         | <i>1</i>                                                | <i>3</i>   | <i>4</i>   | <i>7</i>   | <i>0</i> |   |
|                      | Macrophage invasion         | Mmpl7                                                                                       | MMPL domain protein                                     | 0          | 1          | 1          | 2        | 0 |
|                      |                             | <i>Macrophage Invasion Total</i>                                                            | <i>0</i>                                                | <i>1</i>   | <i>1</i>   | <i>2</i>   | <i>0</i> |   |
|                      | Serum resistance            | Asc1                                                                                        | Hypothetical protein BATDRAFT_11488                     | 3          | 0          | 3          | 3        | 0 |
|                      |                             | Brk                                                                                         | Brk8; serum resistance protein                          | 1          | 0          | 1          | 1        | 0 |
|                      |                             | Dsr                                                                                         | Serum resistance protein A2                             | 0          | 2          | 2          | 10       | 0 |
|                      |                             | <i>Serum Resistance Total</i>                                                               | <i>4</i>                                                | <i>2</i>   | <i>6</i>   | <i>14</i>  | <i>0</i> |   |
|                      | Other                       | AmoG                                                                                        | UDP-galactose-lipid carrier transferase                 | 0          | 3          | 3          | 6        | 0 |
|                      |                             | Agsp                                                                                        | Apicomplexan protein                                    | 2          | 0          | 2          | 2        | 0 |
|                      |                             | Bg                                                                                          | Beta-giardin                                            | 1          | 0          | 1          | 1        | 0 |
|                      |                             | BptA                                                                                        | Protein BptA (Borrelial persistence in ticks protein A) | 0          | 1          | 1          | 5        | 0 |
|                      |                             | Geh                                                                                         | Lipase (Glycerol ester hydrolase)                       | 0          | 4          | 4          | 8        | 0 |
|                      |                             | LmA                                                                                         | Antigen A                                               | 0          | 1          | 1          | 2        | 0 |
|                      |                             | LmA8                                                                                        | Antigen 8                                               | 0          | 1          | 1          | 2        | 0 |
|                      |                             | LmA9                                                                                        | Antigen 9                                               | 0          | 2          | 2          | 4        | 0 |
|                      |                             | LmA10                                                                                       | Antigen 10                                              | 0          | 2          | 2          | 4        | 0 |
|                      |                             | LmA11                                                                                       | Antigen 11                                              | 0          | 2          | 2          | 4        | 0 |
|                      |                             | LmA12                                                                                       | Antigen 12                                              | 0          | 2          | 2          | 4        | 0 |
|                      |                             | LmA13                                                                                       | Antigen 13                                              | 0          | 2          | 2          | 4        | 0 |
|                      |                             | LmA14                                                                                       | Antigen 14                                              | 0          | 2          | 2          | 4        | 0 |
|                      |                             | LmA15                                                                                       | Antigen 15                                              | 0          | 2          | 2          | 4        | 0 |
|                      |                             | LmA16                                                                                       | Antigen 16                                              | 0          | 2          | 2          | 4        | 0 |
|                      |                             | LmA17                                                                                       | Antigen 17                                              | 0          | 2          | 2          | 4        | 0 |
|                      |                             | LmA18                                                                                       | Antigen 18                                              | 0          | 2          | 2          | 4        | 0 |
|                      |                             | LmA19                                                                                       | Antigen 19                                              | 0          | 2          | 2          | 4        | 0 |
|                      |                             | LmA20                                                                                       | Antigen 20                                              | 0          | 2          | 2          | 4        | 0 |
|                      |                             | LmA21                                                                                       | Antigen 21                                              | 0          | 2          | 2          | 4        | 0 |
|                      |                             | LmA22                                                                                       | Antigen 22                                              | 0          | 2          | 2          | 4        | 0 |
|                      |                             | LmA23                                                                                       | Antigen 23                                              | 0          | 2          | 2          | 4        | 0 |
|                      |                             | LmA24                                                                                       | Antigen 24                                              | 0          | 2          | 2          | 4        | 0 |
|                      |                             | LmA25                                                                                       | Antigen 25                                              | 0          | 2          | 2          | 4        | 0 |
|                      |                             | LmA26                                                                                       | Antigen 26                                              | 0          | 2          | 2          | 4        | 0 |
|                      |                             | LmA27                                                                                       | Antigen 27                                              | 0          | 2          | 2          | 4        | 0 |
|                      |                             | LmA28                                                                                       | Antigen 28                                              | 0          | 2          | 2          | 4        | 0 |
|                      |                             | LmA29                                                                                       | Antigen 29                                              | 0          | 2          | 2          | 4        | 0 |
|                      |                             | LmA30                                                                                       | Antigen 30                                              | 0          | 2          | 2          | 4        | 0 |
|                      |                             | LmA31                                                                                       | Antigen 31                                              | 0          | 2          | 2          | 4        | 0 |
|                      |                             | LmA32                                                                                       | Antigen 32                                              | 0          | 2          | 2          | 4        | 0 |
|                      |                             | LmA33                                                                                       | Antigen 33                                              | 0          | 2          | 2          | 4        | 0 |
|                      |                             | LmA34                                                                                       | Antigen 34                                              | 0          | 2          | 2          | 4        | 0 |
|                      |                             | LmA35                                                                                       | Antigen 35                                              | 0          | 2          | 2          | 4        | 0 |
|                      |                             | LmA36                                                                                       | Antigen 36                                              | 0          | 2          | 2          | 4        | 0 |
|                      |                             | LmA37                                                                                       | Antigen 37                                              | 0          | 2          | 2          | 4        | 0 |
|                      |                             | LmA38                                                                                       | Antigen 38                                              | 0          | 2          | 2          | 4        | 0 |
|                      |                             | LmA39                                                                                       | Antigen 39                                              | 0          | 2          | 2          | 4        | 0 |
|                      |                             | LmA40                                                                                       | Antigen 40                                              | 0          | 2          | 2          | 4        | 0 |
|                      |                             | LmA41                                                                                       | Antigen 41                                              | 0          | 2          | 2          | 4        | 0 |
|                      |                             | LmA42                                                                                       | Antigen 42                                              | 0          | 2          | 2          | 4        | 0 |
|                      |                             | LmA43                                                                                       | Antigen 43                                              | 0          | 2          | 2          | 4        | 0 |
|                      |                             | LmA44                                                                                       | Antigen 44                                              | 0          | 2          | 2          | 4        | 0 |
|                      |                             | LmA45                                                                                       | Antigen 45                                              | 0          | 2          | 2          | 4        | 0 |
|                      |                             | LmA46                                                                                       | Antigen 46                                              | 0          | 2          | 2          | 4        | 0 |
|                      |                             | LmA47                                                                                       | Antigen 47                                              | 0          | 2          | 2          | 4        | 0 |
|                      |                             | LmA48                                                                                       | Antigen 48                                              | 0          | 2          | 2          | 4        | 0 |
|                      |                             | LmA49                                                                                       | Antigen 49                                              | 0          | 2          | 2          | 4        | 0 |
|                      |                             | LmA50                                                                                       | Antigen 50                                              | 0          | 2          | 2          | 4        | 0 |
|                      |                             | LmA51                                                                                       | Antigen 51                                              | 0          | 2          | 2          | 4        | 0 |
|                      |                             | LmA52                                                                                       | Antigen 52                                              | 0          | 2          | 2          | 4        | 0 |
|                      |                             | LmA53                                                                                       | Antigen 53                                              | 0          | 2          | 2          | 4        | 0 |
|                      |                             | LmA54                                                                                       | Antigen 54                                              | 0          | 2          | 2          | 4        | 0 |
|                      |                             | LmA55                                                                                       | Antigen 55                                              | 0          | 2          | 2          | 4        | 0 |
|                      |                             | LmA56                                                                                       | Antigen 56                                              | 0          | 2          | 2          | 4        | 0 |
|                      |                             | LmA57                                                                                       | Antigen 57                                              | 0          | 2          | 2          | 4        | 0 |
|                      |                             | LmA58                                                                                       | Antigen 58                                              | 0          | 2          | 2          | 4        | 0 |
|                      |                             | LmA59                                                                                       | Antigen 59                                              | 0          | 2          | 2          | 4        | 0 |
|                      |                             | LmA60                                                                                       | Antigen 60                                              | 0          | 2          | 2          | 4        | 0 |
|                      |                             | LmA61                                                                                       | Antigen 61                                              | 0          | 2          | 2          | 4        | 0 |
|                      |                             | LmA62                                                                                       | Antigen 62                                              | 0          | 2          | 2          | 4        | 0 |
|                      |                             | LmA63                                                                                       | Antigen 63                                              | 0          | 2          | 2          | 4        | 0 |
|                      |                             | LmA64                                                                                       | Antigen 64                                              | 0          | 2          | 2          | 4        | 0 |
|                      |                             | LmA65                                                                                       | Antigen 65                                              | 0          | 2          | 2          | 4        | 0 |
|                      |                             | LmA66                                                                                       | Antigen 66                                              | 0          | 2          | 2          | 4        | 0 |
|                      |                             | LmA67                                                                                       | Antigen 67                                              | 0          | 2          | 2          | 4        | 0 |
|                      |                             | LmA68                                                                                       | Antigen 68                                              | 0          | 2          | 2          | 4        | 0 |
|                      |                             | LmA69                                                                                       | Antigen 69                                              | 0          | 2          | 2          | 4        | 0 |
|                      |                             | LmA70                                                                                       | Antigen 70                                              | 0          | 2          | 2          | 4        | 0 |
|                      |                             | LmA71                                                                                       | Antigen 71                                              | 0          | 2          | 2          | 4        | 0 |
|                      |                             | LmA72                                                                                       | Antigen 72                                              | 0          | 2          | 2          | 4        | 0 |
|                      |                             | LmA73                                                                                       | Antigen 73                                              | 0          | 2          | 2          | 4        | 0 |
|                      |                             | LmA74                                                                                       | Antigen 74                                              | 0          | 2          | 2          | 4        | 0 |
|                      |                             | LmA75                                                                                       | Antigen 75                                              | 0          | 2          | 2          | 4        | 0 |
|                      |                             | LmA76                                                                                       | Antigen 76                                              | 0          | 2          | 2          | 4        | 0 |
|                      |                             | LmA77                                                                                       | Antigen 77                                              | 0          | 2          | 2          | 4        | 0 |
|                      |                             | LmA78                                                                                       | Antigen 78                                              | 0          | 2          | 2          | 4        | 0 |
|                      |                             | LmA79                                                                                       | Antigen 79                                              | 0          | 2          | 2          | 4        | 0 |
|                      |                             | LmA80                                                                                       | Antigen 80                                              | 0          | 2          | 2          | 4        | 0 |
|                      |                             | LmA81                                                                                       | Antigen 81                                              | 0          | 2          | 2          | 4        | 0 |
|                      |                             | LmA82                                                                                       | Antigen 82                                              | 0          | 2          | 2          | 4        | 0 |
|                      |                             | LmA83                                                                                       | Antigen 83                                              | 0          | 2          | 2          | 4        | 0 |
|                      |                             | LmA84                                                                                       | Antigen 84                                              | 0          | 2          | 2          | 4        | 0 |
|                      |                             | LmA85                                                                                       | Antigen 85                                              | 0          | 2          | 2          | 4        | 0 |
|                      |                             | LmA86                                                                                       | Antigen 86                                              | 0          | 2          | 2          | 4        | 0 |
|                      |                             | LmA87                                                                                       | Antigen 87                                              | 0          | 2          | 2          | 4        | 0 |
|                      |                             | LmA88                                                                                       | Antigen 88                                              | 0          | 2          | 2          | 4        | 0 |
|                      |                             | LmA89                                                                                       | Antigen 89                                              | 0          | 2          | 2          | 4        | 0 |
|                      |                             | LmA90                                                                                       | Antigen 90                                              | 0          | 2          | 2          | 4        | 0 |
|                      |                             | LmA91                                                                                       | Antigen 91                                              | 0          | 2          | 2          | 4        | 0 |
|                      |                             | LmA92                                                                                       | Antigen 92                                              | 0          | 2          | 2          | 4        | 0 |
|                      |                             | LmA93                                                                                       | Antigen 93                                              | 0          | 2          | 2          | 4        | 0 |
|                      |                             | LmA94                                                                                       | Antigen 94                                              | 0          | 2          | 2          | 4        | 0 |
|                      |                             | LmA95                                                                                       | Antigen 95                                              | 0          | 2          | 2          | 4        | 0 |
|                      |                             | LmA96                                                                                       | Antigen 96                                              | 0          | 2          | 2          | 4        | 0 |
|                      |                             | LmA97                                                                                       | Antigen 97                                              | 0          | 2          | 2          | 4        | 0 |
|                      |                             | LmA98                                                                                       | Antigen 98                                              | 0          | 2          | 2          | 4        | 0 |
|                      |                             | LmA99                                                                                       | Antigen 99                                              | 0          | 2          | 2          | 4        | 0 |
|                      |                             | LMA100                                                                                      | Antigen 100                                             | 0          | 2          | 2          | 4        | 0 |
|                      |                             | <i>Other Immune Evasion Total</i>                                                           | <i>9</i>                                                | <i>26</i>  | <i>35</i>  | <i>69</i>  | <i>0</i> |   |
|                      | <i>Immune Evasion Total</i> |                                                                                             | <i>71</i>                                               | <i>298</i> | <i>369</i> | <i>739</i> | <i>0</i> |   |
| Marker               | Ass                         | Adaptor protein complex large chain subunit BetaA                                           | 0                                                       | 1          | 1          | 2          | 0        |   |
|                      | BetaA                       | Adaptor protein complex large chain subunit BetaA                                           | 1                                                       | 0          | 1          | 1          | 0        |   |
|                      | CatL                        | Cathepsin L precursor                                                                       | 6                                                       | 4          | 10         | 14         | 0        |   |
|                      | CdkI                        | Kinase, CMGC CDKL                                                                           | 1                                                       | 1          | 2          | 3          | 0        |   |
|                      | CF1A                        | Cleavage and polyadenylation factor CF-1A component RNA15                                   | 0                                                       | 1          | 1          | 8          | 0        |   |
|                      | Cp15_60                     | Sporozoite surface antigen CP15/60                                                          | 0                                                       | 2          | 2          | 4          | 0        |   |
|                      | Crp                         | CXC-rich protein                                                                            | 4                                                       | 2          | 6          | 8          | 0        |   |
|                      | Dlp                         | Dynein-like protein                                                                         | 1                                                       | 1          | 2          | 3          | 0        |   |
|                      | Dph2                        | Diphthamide synthase subunit DPH2                                                           | 1                                                       | 5          | 6          | 17         | 0        |   |
|                      | EEF2                        | Peptide elongation factor 2                                                                 | 4                                                       | 1          | 5          | 5          | 0        |   |
|                      | Egf                         | High cysteine membrane EGF-like protein                                                     | 10                                                      | 14         | 24         | 27         | 0        |   |
|                      | Fdnr                        | Nitroreductase family protein fused to ferredoxin domain Fd-NR1                             | 3                                                       | 2          | 5          | 7          | 0        |   |
|                      | FprA                        | A-type flavoprotein lateral transfer candidate                                              | 6                                                       | 0          | 6          | 6          | 0        |   |
|                      | FRI                         | Putative fucose transferase wib & transmembrane domains, within locus of 3 paralogous genes | 1                                                       | 6          | 7          | 10         | 0        |   |
|                      | Gccap                       | Golgi/cell cycle associated protein, putative                                               | 1                                                       | 1          | 2          | 3          | 0        |   |
|                      | Gp49                        | Invariant antigen Gp49                                                                      | 1                                                       | 0          | 1          | 1          | 0        |   |
|                      | Gta2                        | Giardia trophozoite antigen GTA-2                                                           | 1                                                       | 0          | 1          | 1          | 0        |   |
|                      | HCNCP                       | High cysteine membrane protein Group 6                                                      | 98                                                      | 101        | 199        | 247        | 0        |   |
|                      | Hspptmd                     | Hypothetical protein having a signal peptide and transmembrane domain near C-terminus       | 4                                                       | 0          | 4          | 4          | 0        |   |
|                      | ItiP54                      | ITiIN P34                                                                                   | 1                                                       | 2          | 3          | 3          | 0        |   |
|                      | InterB                      | Putative InterB family protein, partial                                                     | 0                                                       | 3          | 3          | 9          | 0        |   |
|                      | Ire                         | IRE protein kinase                                                                          | 5                                                       | 2          | 7          | 8          | 0        |   |
|                      | Klp5                        | ED4F6.2 like protein                                                                        | 2                                                       | 1          | 3          | 5          | 0        |   |
|                      | Lrrp1                       | Leucine-rich repeat protein 1 virus receptor protein                                        | 1                                                       | 0          | 1          | 1          | 0        |   |
|                      | Mbo                         | Median body protein                                                                         | 1                                                       | 0          | 1          | 1          | 0        |   |
|                      | Mdip1                       | MDR protein-like protein                                                                    | 1                                                       | 0          | 1          | 1          | 0        |   |
|                      | Myb1                        | Myb 1-like protein                                                                          | 3                                                       | 0          | 3          | 3          | 0        |   |
|                      | Nefm                        | Neurofilament medium polypeptide, putative                                                  | 1                                                       | 0          | 1          | 1          | 0        |   |
|                      | Np1                         | Antigenic protein NP1/Non-pathogenic protein 1                                              | 0                                                       | 2          | 2          | 4          | 0        |   |
|                      | Nuf1                        | Spindle pole body component 110                                                             | 1                                                       | 0          | 1          | 1          | 0        |   |
|                      | P115                        | P115, putative                                                                              | 1                                                       | 1          | 2          | 3          | 0        |   |
|                      | P40                         | Translation initiation factor IF-3 subunit 3                                                | 0                                                       | 1          | 1          | 2          | 0        |   |
|                      | Phkg                        | Phosphorylase B kinase gamma catalytic chain                                                | 3                                                       | 2          | 5          | 7          | 0        |   |
|                      | PirG                        | Exported repetitive protein precursor PirG (cell surface protein) (EXP3)                    | 0                                                       | 1          | 1          | 2          | 0        |   |
|                      | Pmm2                        | Phosphomannomutase-2                                                                        | 3                                                       | 1          | 4          | 5          | 0        |   |
|                      | S1p1                        | S1/P1nuclease, putative                                                                     | 4                                                       | 2          | 6          | 7          | 0        |   |
|                      | Sec6                        | Exocyst complex subunit Sec6                                                                | 1                                                       | 5          | 6          | 11         | 0        |   |
|                      | Smpc                        | Set and mynd domain containing protein, putative                                            | 1                                                       | 0          | 1          | 1          | 0        |   |
|                      | Spgp1                       | Signal peptide plus GPI anchored membrane protein                                           | 0                                                       | 1          | 1          | 2          | 0        |   |
|                      | Spp                         | Spindle pole protein, putative                                                              | 3                                                       | 3          | 6          | 9          | 0        |   |
|                      | Spptmd                      | Hypothetical protein, conserved                                                             | 0                                                       | 1          | 1          | 2          | 0        |   |
|                      | Spspr                       | Signal peptide, serine proline rich, possible low mw mucin glycoprotein locus of 6 genes    | 0                                                       | 1          | 1          | 2          | 0        |   |
|                      | Srap                        | Serine-rich 25 kDa antigen protein, putative                                                | 0                                                       | 1          | 1          | 2          | 0        |   |
|                      | Stu2                        | STU2-like protein                                                                           | 1                                                       | 1          | 2          | 3          | 0        |   |
|                      | Sycp                        | Synaptonemal complex protein, putative                                                      | 4                                                       | 3          | 7          | 10         | 0        |   |
|                      | Tem                         | TM efflux prot                                                                              | 1                                                       | 1          | 2          | 3          | 0        |   |
|                      | Tmp52                       | TMP52                                                                                       | 1                                                       | 0          | 1          | 1          | 0        |   |
|                      | Tmp55                       | TMP55                                                                                       | 1                                                       | 0          | 1          | 1          | 0        |   |
|                      | Ubec14                      | Ubiquitin-conjugating enzyme 14/Ubiquitin-conjugating enzyme E2                             | 1                                                       | 1          | 2          | 3          | 0        |   |
|                      | Uch                         | Ubiquitin C-terminal hydrolase of the cysteine proteinase fold                              | 0                                                       | 2          | 2          | 4          | 0        |   |
|                      | Upl1                        | UPL-1                                                                                       | 1                                                       | 0          | 1          | 1          | 0        |   |
|                      | Vcc2                        | Vesicle coat complex subunit zeta                                                           | 0                                                       | 4          | 4          | 8          | 0        |   |
|                      | Xoc                         | Ximpa ortholog conserved protein seen in bacteria and eukaryotes                            | 0                                                       | 2          | 2          | 4          | 0        |   |
|                      | Yip                         | Yip                                                                                         | 1                                                       | 0          | 1          | 1          | 0        |   |
|                      | Yip1                        | Yip interacting protein, putative                                                           | 1                                                       | 1          | 2          | 3          | 0        |   |
|                      | Yip2                        | Yip interacting protein, putative                                                           | 1                                                       | 1          | 2          | 3          | 0        |   |
|                      | <i>Marker Total</i>         |                                                                                             | <i>188</i>                                              | <i>186</i> | <i>374</i> | <i>508</i> | <i>0</i> |   |
| Soil-borne pathogens | AcsC                        | Achromobactin biosynthetic protein AcsC                                                     | 1                                                       | 3          | 4          | 13         | 0        |   |
|                      | AcsD                        | Achromobactin biosynthetic protein AcsD                                                     | 0                                                       | 5          | 5          | 15         | 0        |   |
|                      | Arp1                        | Adhesin protein arp1                                                                        | 1                                                       | 1          | 2          | 3          | 0        |   |
|                      | AvrA                        | Type III effector protein AvrA                                                              | 0                                                       | 1          | 1          | 2          | 0        |   |
|                      | AvrBs1                      | Avirulence protein AvrBs1                                                                   | 0                                                       | 1          | 1          | 2          | 0        |   |
|                      | AvrBs2                      | Avirulence protein avrBs2                                                                   | 0                                                       | 1          | 1          | 2          | 0        |   |
|                      | AvrBs3                      | AvrBs3 family type III effector protein                                                     | 1                                                       | 1          | 2          | 3          | 0        |   |
|                      | CelA                        | Cellulase CelA                                                                              | 0                                                       | 2          | 2          | 6          | 0        |   |
|                      | Cyanide_hydrolase_Fungi     | Conserved hypothetical protein                                                              | 49                                                      | 21         | 70         | 75         | 0        |   |
|                      | DspE                        | Avirulence protein DspE                                                                     | 1                                                       | 2          | 3          | 5          | 0        |   |
|                      | Enriatin_synthase_Fungi     | Nonribosomal peptide synthase, putative                                                     | 7                                                       | 5          | 12         | 14         | 0        |   |
|                      | EsaT6                       | 6 kDa Early secretory antigenic target EsaT6 (EsaT-6)                                       | 0                                                       | 1          | 1          | 2          | 0        |   |
|                      | Evr                         | Evr regulated gene A (ErgA)                                                                 | 2                                                       | 1          | 3          | 4          | 0        |   |
|                      | ExoY                        | Adenylyate cyclase ExoY                                                                     | 0                                                       | 1          | 1          | 2          | 0        |   |

|                                   |                                                                         |            |            |            |             |          |
|-----------------------------------|-------------------------------------------------------------------------|------------|------------|------------|-------------|----------|
| FyuA                              | Pesticin receptor                                                       | 1          | 6          | 7          | 14          | 0        |
| HasA                              | Hemophore HasA                                                          | 0          | 9          | 9          | 18          | 0        |
| HopAF1                            | Type III effector HopAF1                                                | 1          | 4          | 5          | 14          | 0        |
| HrcU                              | Type III secretion system translocation protein HrcU                    | 7          | 6          | 13         | 19          | 0        |
| HrpB2                             | Type III secretion protein HrpB                                         | 0          | 9          | 9          | 19          | 0        |
| HrpG                              | Response regulator protein                                              | 3          | 1          | 4          | 5           | 0        |
| HrpG1                             | Type III secretion protein HrpG                                         | 1          | 0          | 1          | 1           | 0        |
| HrpP                              | Type III secretion protein HrpP                                         | 2          | 1          | 3          | 4           | 0        |
| HrpX                              | AraC-Type transcriptional regulator HrpX                                | 0          | 1          | 1          | 2           | 0        |
| HrpY2                             | Response regulator HrpY                                                 | 1          | 1          | 2          | 3           | 0        |
| IgaA                              | Intracellular growth attenuator IgaA                                    | 2          | 29         | 31         | 62          | 0        |
| Imp                               | Immunodominant membrane protein                                         | 1          | 1          | 2          | 3           | 0        |
| ImpG                              | ImpG                                                                    | 1          | 5          | 6          | 17          | 0        |
| ImpH                              | ImpH                                                                    | 2          | 5          | 7          | 16          | 0        |
| ImpJ                              | Type VI secretion system protein ImpJ                                   | 0          | 6          | 6          | 12          | 0        |
| Iis                               | Lipoprotein                                                             | 0          | 1          | 1          | 2           | 0        |
| MgtB                              | P-Type 2 magnesium transport ATPase                                     | 1          | 16         | 17         | 33          | 0        |
| Mip                               | Macrophage infectivity potentiator                                      | 7          | 4          | 11         | 15          | 0        |
| PapC                              | Outer membrane usher protein PapC precursor                             | 12         | 47         | 59         | 108         | 0        |
| Pat1                              | Putative pat-1 homologue                                                | 3          | 1          | 4          | 6           | 0        |
| Pch                               | Isochlorismate synthase                                                 | 0          | 1          | 1          | 2           | 0        |
| PchB                              | Isochlorismate-pyruvate lyase                                           | 0          | 1          | 1          | 2           | 0        |
| PchR                              | Transcriptional regulator PchR                                          | 0          | 1          | 1          | 2           | 0        |
| PinF1                             | Cytochrome P450-pinF                                                    | 1          | 1          | 2          | 4           | 0        |
| PstB                              | Pesticin                                                                | 2          | 0          | 2          | 2           | 0        |
| PtIB                              | VirB3-like type IV secretion system outer membrane component PtIB       | 0          | 1          | 1          | 2           | 0        |
| Scytalone_dehydratase_Fungi       | Scytalone dehydratase                                                   | 22         | 3          | 25         | 26          | 0        |
| Spiralin                          | Spiralin                                                                | 3          | 1          | 4          | 6           | 0        |
| Tom                               | Tomatinase                                                              | 2          | 0          | 2          | 2           | 0        |
| TxA                               | Thaxtomin synthetase A                                                  | 1          | 0          | 1          | 1           | 0        |
| VirE2                             | Type IV secretion system single-stranded DNA binding protein VirE2      | 1          | 0          | 1          | 1           | 0        |
| Vmp1                              | Variable membrane protein VMP1                                          | 0          | 1          | 1          | 26          | 0        |
| XcpY                              | Type II secretion system protein Y/General secretion pathway protein L  | 1          | 0          | 1          | 1           | 0        |
| XcpZ                              | Type II secretion system protein M/General secretion pathway protein M  | 1          | 0          | 1          | 1           | 0        |
| XopD                              | Xanthomonas outer protein D                                             | 2          | 0          | 2          | 2           | 0        |
| YopD                              | Type III secretion host injection and negative regulator protein (YopD) | 4          | 1          | 5          | 6           | 0        |
| YopN                              | Type III secretion regulator YopN                                       | 1          | 1          | 2          | 3           | 0        |
| YopT                              | Cytotoxic effector protein YopT/Cysteine protease YopT                  | 0          | 3          | 3          | 6           | 0        |
| YscB                              | YopN-specific chaperone YscB                                            | 2          | 0          | 2          | 2           | 0        |
| YscO                              | Yop proteins translocation protein O                                    | 0          | 1          | 1          | 2           | 0        |
| YscX                              | Type III secretion protein YscX                                         | 2          | 3          | 5          | 11          | 0        |
| YscY                              | Type III secretion protein YscY                                         | 0          | 1          | 1          | 1           | 0        |
| <b>Soil-borne pathogens Total</b> |                                                                         | <b>152</b> | <b>219</b> | <b>371</b> | <b>636</b>  | <b>0</b> |
| <b>Toxins</b>                     |                                                                         |            |            |            |             |          |
| afلاتoxin_aflQ                    | O-methylsterigmatocystin oxidoreductase                                 | 23         | 9          | 32         | 33          | 0        |
| Amr                               | Nonribosomal peptide synthetase, putative                               | 6          | 3          | 9          | 14          | 0        |
| BinAB                             | Binary toxin                                                            | 0          | 4          | 4          | 12          | 0        |
| BoNT                              | Botulinum neurotoxin type F                                             | 1          | 2          | 3          | 13          | 0        |
| BpIB                              | Acetyltransferase BpIB                                                  | 0          | 1          | 1          | 2           | 0        |
| BpIC                              | Lipopolysaccharide biosynthesis protein BpIC                            | 0          | 2          | 2          | 4           | 0        |
| BpIE                              | Glycosyl transferase BpIE                                               | 0          | 2          | 2          | 4           | 0        |
| BpIF                              | Lipopolysaccharide biosynthesis protein BpIF                            | 0          | 1          | 1          | 2           | 0        |
| BpIG                              | Sugar transferase BpIG                                                  | 0          | 2          | 2          | 4           | 0        |
| BpIH                              | Glycosyl transferase BpIH                                               | 0          | 1          | 1          | 2           | 0        |
| BpIL                              | Lipopolysaccharide biosynthesis protein BpIL                            | 0          | 1          | 1          | 2           | 0        |
| C3                                | Mono-ADP-ribosyltransferase C3 (Exoenzyme C3)                           | 0          | 2          | 2          | 4           | 0        |
| Cdt                               | Cytotoxin distending toxin A                                            | 0          | 3          | 3          | 7           | 0        |
| CdtB                              | Cytotoxin distending toxin B-like protein                               | 5          | 8          | 13         | 27          | 0        |
| CdtC                              | Cytotoxin distending toxin CdtC                                         | 0          | 3          | 3          | 6           | 0        |
| Cnf                               | Cytotoxic necrotizing factor 1                                          | 3          | 7          | 10         | 26          | 0        |
| Cya                               | Calmodulin-sensitive adenylate cyclase                                  | 0          | 1          | 1          | 2           | 0        |
| CyAB                              | Cytolysin secretion ATP-binding protein                                 | 0          | 3          | 3          | 6           | 0        |
| CyA                               | Cytolysin activator protein CyA                                         | 1          | 0          | 1          | 1           | 0        |
| CylC2                             | CylCin-2, putative                                                      | 0          | 3          | 3          | 6           | 0        |
| CyII                              | Cytolysin immunity CyII domain protein                                  | 1          | 5          | 6          | 19          | 0        |
| CyIM                              | Putative CyIM protein                                                   | 0          | 3          | 3          | 8           | 0        |
| Dnt                               | Dermonecrotic toxin                                                     | 0          | 1          | 1          | 2           | 0        |
| Edin                              | Epidermal cell differentiation inhibitor                                | 0          | 2          | 2          | 5           | 0        |
| ETA                               | Heat-labile enterotoxin A subunit                                       | 3          | 13         | 16         | 29          | 0        |
| ETB                               | Heat-labile enterotoxin B subunit                                       | 2          | 0          | 2          | 2           | 0        |
| Eta                               | Exfoliative toxin A                                                     | 5          | 9          | 14         | 32          | 0        |
| Fumonisin_pkS                     | Polyketide synthase                                                     | 1          | 0          | 1          | 1           | 0        |
| Hla                               | Alpha-hemolysin                                                         | 0          | 1          | 1          | 2           | 0        |
| Hlb                               | Beta-hemolysin                                                          | 1          | 0          | 1          | 1           | 0        |
| Hly                               | Hemolysin                                                               | 15         | 208        | 303        | 650         | 0        |
| Ibp                               | Iota toxin component Ib                                                 | 0          | 3          | 3          | 7           | 0        |
| LuKF                              | Putative leukocidin F subunit                                           | 0          | 2          | 2          | 5           | 0        |
| NetB                              | Delta toxin                                                             | 0          | 2          | 2          | 53          | 0        |
| PagA                              | Protective antigen                                                      | 1          | 3          | 4          | 8           | 0        |
| Pet                               | Serine protease (plasmid-encoded toxin Pet)                             | 0          | 1          | 1          | 2           | 0        |
| Pfp                               | Pore-forming protein-like protein                                       | 4          | 1          | 5          | 6           | 0        |
| PilC1                             | Membrane-associated phospholipase C 2 PilC1                             | 1          | 0          | 1          | 1           | 0        |
| PilC                              | Phospholipase C 3 pilC                                                  | 1          | 0          | 1          | 1           | 0        |
| Ply                               | Alveolysin                                                              | 1          | 0          | 1          | 1           | 0        |
| Pmt                               | Putative toxin                                                          | 1          | 5          | 6          | 13          | 0        |
| Rtx                               | RTX toxin RtxA                                                          | 0          | 6          | 6          | 20          | 0        |
| RtxA                              | Structural toxin protein RtxA                                           | 0          | 2          | 2          | 4           | 0        |
| Slo                               | Alveolysin                                                              | 1          | 0          | 1          | 1           | 0        |
| SpvC                              | Type III effector phosphothreonine lyase SpvC                           | 0          | 2          | 2          | 4           | 0        |
| Sta                               | Heat-stable enterotoxin                                                 | 2          | 0          | 2          | 2           | 0        |
| Stx                               | Shiga-like toxin type 1 subunit A variant                               | 0          | 1          | 1          | 3           | 0        |
| Tccc1                             | Insecticidal toxin complex protein tccc2                                | 1          | 2          | 3          | 5           | 0        |
| Tdn                               | Hemolysin S                                                             | 0          | 1          | 1          | 2           | 0        |
| Toxin                             | Exfoliative toxin A                                                     | 2          | 18         | 20         | 41          | 0        |
| ToxR                              | Transmembrane transcriptional activator protein                         | 8          | 35         | 43         | 111         | 0        |
| VacA                              | Vacuolating cytotoxin (VacA) paralogue                                  | 4          | 8          | 12         | 24          | 0        |
| VvhA                              | Cytotoxin, cytolysin precursor VvhA                                     | 0          | 4          | 4          | 8           | 0        |
| VvhB                              | Cytolysin secretion protein VvhB                                        | 0          | 3          | 3          | 6           | 0        |
| WbaB                              | Lipopolysaccharide biosynthesis protein wbpB                            | 0          | 1          | 1          | 2           | 0        |
| XaxA                              | Toxin XaxA                                                              | 0          | 2          | 2          | 6           | 0        |
| XaxB                              | Toxin XaxB                                                              | 0          | 2          | 2          | 6           | 0        |
| Ymt                               | Murine toxin                                                            | 0          | 4          | 4          | 8           | 0        |
| <b>Toxins Total</b>               |                                                                         | <b>94</b>  | <b>488</b> | <b>582</b> | <b>1278</b> | <b>0</b> |
| <b>Secretion Systems</b>          | <b>Type II secretion system</b>                                         |            |            |            |             |          |
| AexT                              | Effector protein AexT                                                   | 2          | 0          | 2          | 2           | 0        |
| BipB                              | Translocator protein BipB                                               | 0          | 1          | 1          | 2           | 0        |
| BipC                              | Type III secretion target BipC                                          | 0          | 1          | 1          | 2           | 0        |
| BsaK                              | Type III secretion system protein BsaK                                  | 0          | 1          | 1          | 2           | 0        |
| EsaV                              | Type III secretion protein EsaV                                         | 0          | 2          | 2          | 7           | 0        |
| EscD                              | Type III secretion system protein EscD                                  | 0          | 1          | 1          | 2           | 0        |





|                 |                            |                                       |                                                 |                                                                        |             |             |             |            |            |
|-----------------|----------------------------|---------------------------------------|-------------------------------------------------|------------------------------------------------------------------------|-------------|-------------|-------------|------------|------------|
|                 |                            | Integrase_tyrosine                    | Tyrosine recombinase                            | 1                                                                      | 7           | 8           | 15          | 0          |            |
|                 |                            | MotA                                  | Middle transcription protein A                  | 1                                                                      | 0           | 1           | 1           | 0          |            |
|                 |                            | Primase                               | DNA primase                                     | 3                                                                      | 12          | 15          | 33          | 0          |            |
|                 |                            | RNA_dependent_RNA_polymerase          | Replicase                                       | 13                                                                     | 9           | 22          | 31          | 0          |            |
|                 |                            | Single_strand_annealing_protein       | Single strand annealing protein                 | 2                                                                      | 13          | 15          | 29          | 0          |            |
|                 |                            | Sliding_clamp_T4                      | gp45 Sliding clamp DNA polymerase               | 3                                                                      | 4           | 7           | 11          | 0          |            |
|                 |                            | Ssb                                   | ssDNA binding protein gp32                      | 1                                                                      | 8           | 9           | 18          | 0          |            |
|                 |                            | T4_recomb_endonuclease                | gp47 Recombination endonuclease subunit         | 4                                                                      | 14          | 18          | 32          | 0          |            |
|                 |                            | T4_RNase_H                            | RNaseH ribonuclease                             | 0                                                                      | 2           | 4           | 4           | 0          |            |
|                 |                            | T4_type_portal_protein                | Portal vertex protein gp20                      | 5                                                                      | 5           | 10          | 17          | 0          |            |
|                 |                            | T5_genome_internalization_A1          | A1 protein                                      | 0                                                                      | 2           | 2           | 8           | 0          |            |
|                 |                            | Terminal_protein_linear_DNA_phage     | Terminal protein                                | 0                                                                      | 5           | 5           | 11          | 0          |            |
|                 |                            | Terminase_large_subunit               | Putative large terminase subunit                | 2                                                                      | 13          | 15          | 31          | 0          |            |
|                 |                            | Terminase_small_subunit               | Truncated gp16 terminase subunit                | 1                                                                      | 3           | 4           | 7           | 0          |            |
|                 |                            | UvW                                   | RNA-DNA and DNA-DNA helicase/ATPase             | 2                                                                      | 8           | 10          | 18          | 0          |            |
|                 |                            |                                       | <i>Bacteriophage Replication Total</i>          | <i>56</i>                                                              | <i>189</i>  | <i>245</i>  | <i>471</i>  | <i>0</i>   |            |
|                 | <b>Structural</b>          | Contractile_central_tail_tube_protein | T4-like tail tube protein                       | 3                                                                      | 9           | 12          | 22          | 0          |            |
|                 |                            | Contractile_tail_sheath_protein       | Tail sheath protein gp18                        | 7                                                                      | 8           | 15          | 22          | 0          |            |
|                 |                            | Major_capsid_protein                  | Major coat protein                              | 12                                                                     | 24          | 36          | 62          | 0          |            |
|                 |                            | Non_contractile_major_tail_protein    | Major tail protein                              | 1                                                                      | 5           | 6           | 13          | 0          |            |
|                 |                            | Scaffold                              | gp21 Prohead core scaffold protein and protease | 0                                                                      | 9           | 9           | 20          | 0          |            |
|                 |                            | Tape_measure_protein                  | Putative tail tape-measure protein              | 0                                                                      | 6           | 6           | 13          | 0          |            |
|                 |                            |                                       | <i>Bacteriophage Structural Total</i>           | <i>23</i>                                                              | <i>61</i>   | <i>84</i>   | <i>152</i>  | <i>0</i>   |            |
|                 | <i>Bacteriophage Total</i> |                                       |                                                 | <i>101</i>                                                             | <i>301</i>  | <i>402</i>  | <i>757</i>  | <i>0</i>   |            |
|                 | <b>Virus Total</b>         |                                       |                                                 | <b>1521</b>                                                            | <b>1336</b> | <b>2857</b> | <b>5264</b> | <b>0</b>   |            |
| <b>Protozoa</b> | <b>Carbon</b>              | <b>Carbon fixation</b>                | Rubisco_Alveolata                               | Rubulose-1,5-bisphosphate carboxylase/oxygenase large subunit          | 12          | 5           | 17          | 29         | 19         |
|                 |                            |                                       | Rubisco_Gluu_Rhiz_Cryp                          | Rubulose-1,5-bisphosphate carboxylase/oxygenase                        | 0           | 5           | 5           | 12         | 5          |
|                 |                            |                                       | Rubisco_Haptophyceae                            | Rubulose-1,5-bisphosphate carboxylase/oxygenase large subunit          | 0           | 1           | 1           | 2          | 2          |
|                 |                            |                                       | Rubisco_Stramenopiles                           | Rubulose-1,5-bisphosphate carboxylase/oxygenase large subunit          | 1           | 1           | 2           | 10         | 5          |
|                 |                            |                                       | Rubisco_Viridiplantae                           | Rubulose-1,5-bisphosphate carboxylase/oxygenase large subunit          | 1           | 0           | 1           | 1          | 1          |
|                 |                            |                                       |                                                 | <i>Carbon Fixation Total</i>                                           | <i>14</i>   | <i>12</i>   | <i>26</i>   | <i>54</i>  | <i>32</i>  |
|                 |                            | <b>Chitin synthesis</b>               | Chitin_synthase_protist                         | Transmembrane chitin synthase, glycosaminyl transferas                 | 21          | 13          | 34          | 49         | 0          |
|                 |                            |                                       |                                                 | <i>Chitin Synthesis Total</i>                                          | <i>21</i>   | <i>13</i>   | <i>34</i>   | <i>49</i>  | <i>0</i>   |
|                 |                            | <b>Carbon degradaton</b>              | Cellulase_GH45_Parabasalia                      | Cellulase or Glycosyl hydrolase family 45 [Parabasalia]                | 2           | 2           | 34          | 49         | 0          |
|                 |                            |                                       | Cellulase_GH7_Parabasalia                       | Cellulase or Glycosyl hydrolase family 7 [Parabasalia]                 | 4           | 2           | 6           | 11         | 0          |
|                 |                            |                                       | Pectate_lyase_Oomycetes                         | Pectate lyase [Oomycetes]                                              | 7           | 11          | 18          | 41         | 0          |
|                 |                            |                                       | Pectin_lyase_Oomycetes                          | Pectin lyase [Oomycetes]                                               | 8           | 12          | 20          | 27         | 21         |
|                 |                            |                                       | Pg_Oomycetes                                    | Polygalacturonase [Oomycetes]                                          | 24          | 15          | 39          | 52         | 0          |
|                 |                            |                                       | Xylose_isomerase_Oomycetes                      | Xylose isomerase [Oomycetes]                                           | 2           | 1           | 4           | 4          | 3          |
|                 |                            |                                       |                                                 | <i>Carbon Degradation Total</i>                                        | <i>46</i>   | <i>43</i>   | <i>89</i>   | <i>139</i> | <i>24</i>  |
|                 | <b>Defense</b>             |                                       | Trichocyst_matrix_ciliophora                    | Trichocyst matrix protein                                              | 1           | 0           | 1           | 1          | 0          |
|                 |                            | <i>Defense Total</i>                  |                                                 | <i>1</i>                                                               | <i>0</i>    | <i>1</i>    | <i>1</i>    | <i>0</i>   |            |
|                 | <b>Electron transfer</b>   |                                       | Carbamate_kinase_Fornicata                      | Carbamate kinase                                                       | 2           | 0           | 2           | 2          | 0          |
|                 |                            |                                       | Carbamate_kinase_Parabasalia                    | Carbamate kinase, putative                                             | 0           | 3           | 3           | 6          | 0          |
|                 |                            |                                       | Fe_hydrogenase_Heterolobosea                    | Type B Fe-hydrogenase                                                  | 3           | 1           | 4           | 4          | 0          |
|                 |                            |                                       |                                                 | <i>Electron Transfer Total</i>                                         | <i>5</i>    | <i>4</i>    | <i>9</i>    | <i>12</i>  | <i>0</i>   |
|                 | <b>Metal Homeostasis</b>   | <b>Metallothionein</b>                | Cd_metallothionein_ciliophora                   | Subfamily 7a metallothionein 1                                         | 3           | 1           | 4           | 10         | 0          |
|                 |                            |                                       | Cu_metallothionein_ciliophora                   | Copper-inducible metallothionein CuMT1                                 | 1           | 0           | 1           | 1          | 0          |
|                 |                            |                                       |                                                 | <i>Metallothionein Total</i>                                           | <i>4</i>    | <i>1</i>    | <i>5</i>    | <i>11</i>  | <i>0</i>   |
|                 |                            | <b>Silicon</b>                        | Silaffin                                        | Silaffin precursor                                                     | 1           | 0           | 1           | 1          | 3          |
|                 |                            |                                       | silicon_transporter                             | Silicon transporter                                                    | 35          | 8           | 43          | 52         | 63         |
|                 |                            |                                       |                                                 | <i>Silicon Total</i>                                                   | <i>36</i>   | <i>8</i>    | <i>44</i>   | <i>53</i>  | <i>66</i>  |
|                 |                            | <b>Vanadium</b>                       | V_BPO_protist                                   | Vanadium-dependent bromoperoxidase 1                                   | 4           | 2           | 6           | 8          | 0          |
|                 |                            |                                       |                                                 | <i>Vanadium Total</i>                                                  | <i>4</i>    | <i>2</i>    | <i>6</i>    | <i>8</i>   | <i>0</i>   |
|                 |                            | <i>Metal Homeostasis Total</i>        |                                                 | <i>44</i>                                                              | <i>11</i>   | <i>55</i>   | <i>72</i>   | <i>66</i>  |            |
|                 | <b>Movement</b>            |                                       | PFR_Euglenozoa                                  | Paraxonemal rod protein PAR 1                                          | 7           | 3           | 10          | 13         | 0          |
|                 |                            | <i>Movement Total</i>                 |                                                 | <i>7</i>                                                               | <i>3</i>    | <i>10</i>   | <i>13</i>   | <i>0</i>   |            |
|                 | <b>Nitrogen</b>            |                                       | Ammonium_transporter                            | Nitrite transporter                                                    | 63          | 51          | 114         | 176        | 0          |
|                 |                            |                                       | Glutamate_synthase_protist                      | Ferredoxin-dependent glutamate synthase/Fd-GOGAT                       | 24          | 14          | 38          | 48         | 0          |
|                 |                            |                                       | Glutamine_synthetase_protist                    | Glutamine synthetase/Glutamate-ammonia ligase                          | 50          | 25          | 75          | 94         | 0          |
|                 |                            |                                       | Nitrate_transporter                             | Nitrate transporter                                                    | 38          | 19          | 57          | 68         | 0          |
|                 |                            |                                       | Nitrite_reductase_protist                       | Ferredoxin nitrite reductase                                           | 6           | 6           | 12          | 15         | 12         |
|                 |                            |                                       |                                                 | <i>Nitrogen Total</i>                                                  | <i>181</i>  | <i>115</i>  | <i>296</i>  | <i>401</i> | <i>12</i>  |
|                 | <b>Photosynthesis</b>      |                                       | ChG                                             | Chlorophyll synthase subunit G                                         | 4           | 2           | 6           | 8          | 0          |
|                 |                            |                                       | PS2_D1_Euglenozoa                               | Photosystem II protein D1                                              | 0           | 2           | 2           | 6          | 0          |
|                 |                            |                                       | Violaxanthin_de_epoxidase_protist               | Violaxanthin de-epoxidase                                              | 4           | 9           | 13          | 21         | 0          |
|                 |                            |                                       |                                                 | <i>Photosynthesis Total</i>                                            | <i>8</i>    | <i>13</i>   | <i>21</i>   | <i>35</i>  | <i>0</i>   |
|                 | <b>Phylogenetic</b>        |                                       | Actin_amoebozoa                                 | Actin                                                                  | 7           | 10          | 17          | 29         | 23         |
|                 |                            |                                       | Actin_Cercozoa                                  | Actin                                                                  | 5           | 1           | 6           | 7          | 6          |
|                 |                            |                                       | Actin_ciliophora                                | Actin                                                                  | 17          | 8           | 25          | 36         | 48         |
|                 |                            |                                       | Actin_Cryptophyta                               | Actin                                                                  | 1           | 1           | 2           | 3          | 4          |
|                 |                            |                                       | Actin_Haptophyceae                              | Actin                                                                  | 1           | 1           | 2           | 4          | 2          |
|                 |                            |                                       | Actin_Perkinsea                                 | Actin, putative                                                        | 7           | 9           | 16          | 18         | 22         |
|                 |                            |                                       | Actin_Rhizaria                                  | Actin                                                                  | 11          | 6           | 17          | 26         | 19         |
|                 |                            |                                       | Actin_Stramenopiles                             | Beta-actin                                                             | 24          | 11          | 35          | 41         | 41         |
|                 |                            |                                       | Actin_Viridiplantae                             | Beta-actin                                                             | 27          | 16          | 43          | 53         | 45         |
|                 |                            |                                       | Alpha_tubulin_Choanoflagellida                  | Tubulin                                                                | 3           | 0           | 3           | 3          | 0          |
|                 |                            |                                       | Alpha_tubulin_ciliophora                        | Alpha-tubulin                                                          | 2           | 3           | 5           | 12         | 23         |
|                 |                            |                                       | Alpha_tubulin_Oxymonads                         | Alpha-tubulin                                                          | 0           | 1           | 1           | 2          | 3          |
|                 |                            |                                       | Cox1_ciliophora                                 | Cytochrome oxidase subunit 1                                           | 14          | 2           | 16          | 19         | 26         |
|                 |                            |                                       | Cox1_Viridiplantae                              | Cytochrome oxidase subunit I                                           | 9           | 17          | 26          | 62         | 29         |
|                 |                            |                                       | EF1a_amoebozoa                                  | Elongation factor 1 alpha                                              | 2           | 0           | 2           | 2          | 6          |
|                 |                            |                                       | EF1a_Fungi_Metazoa_incertae_sedis               | Translation elongation factor 1-alpha-like protein                     | 0           | 1           | 1           | 7          | 2          |
|                 |                            |                                       | EF1a_Heterolobosea                              | Elongation factor 1 alpha                                              | 3           | 3           | 6           | 9          | 7          |
|                 |                            |                                       | EF1a_Jalokoida                                  | Elongation factor 1 alpha                                              | 3           | 0           | 3           | 3          | 4          |
|                 |                            |                                       | EF1a_Oxymonads                                  | Elongation factor-1 alpha                                              | 4           | 4           | 8           | 13         | 8          |
|                 |                            |                                       | EF1a_Stramenopiles                              | Elongation factor-like                                                 | 13          | 1           | 14          | 16         | 21         |
|                 |                            |                                       | GAPDH_Euglenozoa                                | Glyceraldehyde-3-phosphate dehydrogenase-like protein                  | 13          | 6           | 19          | 28         | 28         |
|                 |                            |                                       | GAPDH_Heterolobosea                             | Glyceraldehyde-3-phosphate dehydrogenase                               | 1           | 1           | 2           | 3          | 2          |
|                 |                            |                                       | GAPDH_Parabasalia                               | Glyceraldehyde-3-phosphate dehydrogenase 2                             | 29          | 3           | 32          | 38         | 37         |
|                 |                            |                                       | Hsp90_Apusozoa                                  | HSP90                                                                  | 1           | 0           | 1           | 1          | 1          |
|                 |                            |                                       | Hsp90_Choanoflagellida                          | 90 kDa Heat-shock protein                                              | 7           | 3           | 10          | 11         | 11         |
|                 |                            |                                       | Hsp90_Fornicata                                 | Heat shock protein 90                                                  | 11          | 2           | 13          | 15         | 15         |
|                 |                            |                                       | Hsp90_Stramenopiles                             | Heat shock protein 90                                                  | 20          | 8           | 28          | 37         | 36         |
|                 |                            |                                       | Polyubiquitin_Rhizaria                          | Polyubiquitin                                                          | 2           | 1           | 3           | 5          | 3          |
|                 |                            |                                       |                                                 | <i>Phylogenetic Total</i>                                              | <i>237</i>  | <i>119</i>  | <i>356</i>  | <i>503</i> | <i>472</i> |
|                 | <b>Sulfur assimilation</b> |                                       | AcsF_protist                                    | Magnesium-protoporphyrin IX monomethyl ester aerobic oxidative cyclase | 1           | 12          | 13          | 30         | 0          |
|                 |                            |                                       | APS_kinase_protist                              | Putative bifunctional SAT/APS kinase 2, related                        | 9           | 11          | 20          | 30         | 0          |
|                 |                            |                                       | APS_reductase_protist                           | APS reductase                                                          | 1           | 3           | 4           | 9          | 0          |
|                 |                            |                                       | ATP_sulfurylase_protist                         | ATP sulfurylase Ats1                                                   | 13          | 8           | 21          | 28         | 0          |
|                 |                            |                                       | Cysteine_synthase_protist                       | Cysteine synthase                                                      | 52          | 44          | 96          | 168        | 0          |
|                 |                            |                                       | LPOR_protist                                    | chloroplast light-dependent protochlorophyllide reductase              | 4           | 4           | 8           | 12         | 8          |
|                 |                            |                                       | Mg_chelatase                                    | Magnesium chelatase subunit H, putative chloroplast precursor          | 26          | 49          | 77          | 125        | 83         |
|                 |                            |                                       | Nitrite_transporter                             | Nitrite transporter                                                    | 15          | 14          | 29          | 40         | 0          |
|                 |                            |                                       | Serine_acetyltransferase_protist                | Serine acetyltransferase                                               | 11          | 18          | 29          | 44         | 0          |
|                 |                            |                                       | Sulfate_transporter_protist                     | Sulfate permease                                                       | 57          | 43          | 100         | 137        | 0          |
|                 |                            |                                       | Sulfite_reductase_protist                       | Ferredoxin-sulfite reductase                                           | 5           | 5           | 10          | 14         | 0          |

|                              |                              | Zeaxanthin_epoxidase_protist                                                                                        | Zeaxanthin epoxidase                                                    | 8                                                                | 13                                                       | 21                              | 28          | 0           |             |             |
|------------------------------|------------------------------|---------------------------------------------------------------------------------------------------------------------|-------------------------------------------------------------------------|------------------------------------------------------------------|----------------------------------------------------------|---------------------------------|-------------|-------------|-------------|-------------|
|                              |                              | <b>Sulfur Assimilation Total</b>                                                                                    |                                                                         | <b>204</b>                                                       | <b>224</b>                                               | <b>428</b>                      | <b>665</b>  | <b>83</b>   |             |             |
| Virulence                    | Toxin                        | Glucanase_inhibitor_Oomycetes                                                                                       | Glucanase inhibitor protein, putative                                   | 5                                                                | 9                                                        | 6                               | 0           | 0           |             |             |
|                              |                              | Necrosis_Oomycetes                                                                                                  | Necrosis inducing protein                                               | 22                                                               | 11                                                       | 33                              | 42          | 0           |             |             |
|                              |                              | Pcf_Oomycetes                                                                                                       | Pcf and SCR74-like cys-rich secreted peptide, putative                  | 4                                                                | 9                                                        | 13                              | 25          | 0           |             |             |
|                              |                              | Serine_protease_inhibitor_Oomycetes                                                                                 | Serine protease inhibitor                                               | 3                                                                | 8                                                        | 11                              | 25          | 0           |             |             |
|                              |                              | Trehalose_synthase_Cercozoa                                                                                         | Trehalose-6-phosphate synthase                                          | 1                                                                | 0                                                        | 1                               | 1           | 0           |             |             |
|                              |                              |                                                                                                                     | <b>Toxin Total</b>                                                      |                                                                  | <b>35</b>                                                | <b>29</b>                       | <b>64</b>   | <b>99</b>   | <b>0</b>    |             |
|                              | Other                        | ATR13_Oomycetes                                                                                                     | Avirulence protein ATR13                                                | Avirulence protein ATR13                                         | 1                                                        | 0                               | 1           | 1           | 0           |             |
|                              |                              | ATR1NdWsB_Oomycetes                                                                                                 | Avirulence protein ATR1NdWsB                                            | Avirulence protein ATR1NdWsB                                     | 0                                                        | 3                               | 3           | 10          | 0           |             |
|                              |                              | AVR1_Oomycetes                                                                                                      | Avr1 secreted RxLR effector peptide protein                             | Avr1 secreted RxLR effector peptide protein                      | 1                                                        | 1                               | 2           | 3           | 0           |             |
|                              |                              | AVR1a_Oomycetes                                                                                                     | Avirulence effector protein Avr1a                                       | Avirulence effector protein Avr1a                                | 1                                                        | 2                               | 3           | 4           | 0           |             |
|                              |                              | AVR1b_Oomycetes                                                                                                     | Elicitor Avr1b                                                          | Elicitor Avr1b                                                   | 3                                                        | 2                               | 5           | 10          | 0           |             |
|                              |                              | CBEL_Oomycetes                                                                                                      | Cellulose binding elicitor lectin (CBEL), putative                      | Cellulose binding elicitor lectin (CBEL), putative               | 1                                                        | 2                               | 3           | 5           | 0           |             |
|                              |                              | CRN_Oomycetes                                                                                                       | Crimling and necrosis-inducing protein                                  | Crimling and necrosis-inducing protein                           | 4                                                        | 3                               | 7           | 8           | 0           |             |
|                              | INF1_elicitin_Oomycetes      | Putative elicitor protein RAM5X                                                                                     | Putative elicitor protein RAM5X                                         | 31                                                               | 16                                                       | 47                              | 70          | 0           |             |             |
|                              |                              |                                                                                                                     | <b>Virulence Total</b>                                                  |                                                                  | <b>42</b>                                                | <b>29</b>                       | <b>71</b>   | <b>111</b>  | <b>0</b>    |             |
|                              |                              | <b>Other Protozoa Virulence Total</b>                                                                               |                                                                         | <b>77</b>                                                        | <b>58</b>                                                | <b>135</b>                      | <b>210</b>  | <b>0</b>    |             |             |
| <b>Protozoa Total</b>        |                              |                                                                                                                     |                                                                         | <b>845</b>                                                       | <b>615</b>                                               | <b>1460</b>                     | <b>2154</b> | <b>689</b>  |             |             |
| Fungi                        | Carbon degradation           | Cellulose                                                                                                           | Axe                                                                     | Acetyl xylan esterase                                            | 48                                                       | 20                              | 68          | 75          | 70          |             |
|                              |                              |                                                                                                                     | Cellobiose                                                              | Cellobiose or beta-glucosidase                                   | 187                                                      | 534                             | 721         | 1429        | 763         |             |
|                              |                              |                                                                                                                     | Exoglucanase                                                            | Exoglucanase                                                     | 144                                                      | 75                              | 219         | 314         | 267         |             |
|                              |                              |                                                                                                                     |                                                                         | <b>Cellulose Total</b>                                           |                                                          | <b>379</b>                      | <b>629</b>  | <b>1008</b> | <b>1818</b> | <b>1100</b> |
|                              |                              | Chitin                                                                                                              | Chitin_deacetylase_fungi                                                | Chitin deacetylase [Fungi]                                       | 28                                                       | 18                              | 46          | 55          | 52          |             |
|                              |                              |                                                                                                                     |                                                                         |                                                                  | <b>Chitin Total</b>                                      |                                 | <b>28</b>   | <b>18</b>   | <b>46</b>   | <b>55</b>   |
|                              |                              | Cutin                                                                                                               | Cutinase                                                                | Cutinase                                                         | 96                                                       | 140                             | 236         | 364         | 298         |             |
|                              |                              |                                                                                                                     |                                                                         |                                                                  | <b>Cutin Total</b>                                       |                                 | <b>96</b>   | <b>140</b>  | <b>236</b>  | <b>364</b>  |
|                              |                              | Glyoxylate cycle                                                                                                    | AceA_fungi                                                              | Isocitrate lyase AceA                                            | 24                                                       | 7                               | 31          | 38          | 0           |             |
|                              |                              |                                                                                                                     | AceB_fungi                                                              | Malate synthase, putative                                        | 23                                                       | 12                              | 35          | 49          | 0           |             |
|                              |                              |                                                                                                                     |                                                                         | <b>Glyoxylate cycle Total</b>                                    |                                                          | <b>47</b>                       | <b>19</b>   | <b>66</b>   | <b>87</b>   | <b>0</b>    |
|                              |                              | Glucose                                                                                                             | Glucose_oxidase_fungi                                                   | Glucose oxidase/glucose-1-oxidase                                | 0                                                        | 0                               | 0           | 0           | 45          |             |
|                              |                              |                                                                                                                     |                                                                         |                                                                  | <b>Glucose Total</b>                                     |                                 | <b>0</b>    | <b>0</b>    | <b>0</b>    | <b>45</b>   |
|                              |                              | Hemicellulose                                                                                                       | Xylose_reductase_fungi                                                  | Xylose reductase [Fungi]                                         | 2                                                        | 1                               | 3           | 4           | 0           |             |
|                              |                              |                                                                                                                     |                                                                         |                                                                  | <b>Hemicellulose Total</b>                               |                                 | <b>2</b>    | <b>1</b>    | <b>3</b>    | <b>4</b>    |
|                              |                              | Inulin                                                                                                              | Inulinase                                                               | Inulinase or exo-inulinase                                       | 11                                                       | 16                              | 27          | 47          | 35          |             |
|                              |                              |                                                                                                                     |                                                                         |                                                                  | <b>Inulin Total</b>                                      |                                 | <b>11</b>   | <b>16</b>   | <b>27</b>   | <b>47</b>   |
|                              |                              | Lactose                                                                                                             | Lactase_fungi                                                           | Lactase or Beta-galactosidase [Fungi]                            | 58                                                       | 18                              | 76          | 79          | 101         |             |
|                              |                              |                                                                                                                     |                                                                         |                                                                  | <b>Lactose Total</b>                                     |                                 | <b>58</b>   | <b>18</b>   | <b>76</b>   | <b>79</b>   |
|                              |                              | Lignin                                                                                                              | Ligninase                                                               | Ligninase or Lignin peroxidase                                   | 12                                                       | 10                              | 22          | 42          | 25          |             |
|                              |                              |                                                                                                                     |                                                                         |                                                                  | <b>Lignin Total</b>                                      |                                 | <b>12</b>   | <b>10</b>   | <b>22</b>   | <b>42</b>   |
|                              |                              | Lipids                                                                                                              | Lipase_fungi                                                            | Triacylglycerol acylhydrolase/triacylglycerol lipase             | 0                                                        | 0                               | 0           | 0           | 11          |             |
|                              |                              |                                                                                                                     |                                                                         |                                                                  | <b>Lipids Total</b>                                      |                                 | <b>0</b>    | <b>0</b>    | <b>0</b>    | <b>11</b>   |
|                              |                              | Other                                                                                                               | Alpha_galactosidase_fungi                                               | Alpha-galactosidase [Fungi]                                      | 63                                                       | 20                              | 83          | 89          | 99          |             |
|                              |                              |                                                                                                                     |                                                                         |                                                                  | <b>Other Fungi Carbon Degradation Total</b>              |                                 | <b>63</b>   | <b>20</b>   | <b>83</b>   | <b>89</b>   |
|                              |                              | Pectin                                                                                                              | Endopolygalacturonase_fungi                                             | Endopolygalacturonase [Fungi]                                    | 39                                                       | 18                              | 57          | 71          | 95          |             |
|                              |                              |                                                                                                                     | Exopolygalacturonase_fungi                                              | Exopolygalacturonase or polygalacturonase [Fungi]                | 74                                                       | 31                              | 105         | 117         | 145         |             |
|                              |                              |                                                                                                                     | Pec_Cdeg                                                                | Pectate lyase [Fungi]                                            | 78                                                       | 52                              | 130         | 162         | 157         |             |
|                              |                              |                                                                                                                     | Pel_Cdeg                                                                | Pectin lyase [Fungi]                                             | 13                                                       | 3                               | 16          | 16          | 21          |             |
|                              |                              |                                                                                                                     | Pme_Cdeg                                                                | Pectin methyltransferase [Fungi]                                 | 41                                                       | 22                              | 63          | 70          | 80          |             |
|                              |                              |                                                                                                                     |                                                                         | <b>Pectin Total</b>                                              |                                                          | <b>245</b>                      | <b>126</b>  | <b>371</b>  | <b>437</b>  |             |
|                              |                              | Phospholipids                                                                                                       | Phospholipase_A2_fungi                                                  | Phospholipase A2 (PLA)                                           | 33                                                       | 24                              | 57          | 74          | 70          |             |
|                              |                              |                                                                                                                     | Phospholipase_C_fungi                                                   | Phosphoinositide-specific phospholipase C, putative              | 73                                                       | 41                              | 114         | 130         | 146         |             |
|                              |                              |                                                                                                                     | Phospholipase_D_fungi                                                   | Hypothetical protein NECHADRAFT_66296                            | 75                                                       | 36                              | 111         | 127         | 139         |             |
|                              |                              |                                                                                                                     |                                                                         |                                                                  | <b>Phospholipids Total</b>                               |                                 | <b>181</b>  | <b>101</b>  | <b>282</b>  | <b>331</b>  |
|                              |                              | Protein                                                                                                             | protease_aspartate_fungi                                                | Aspartate protease                                               | 0                                                        | 0                               | 0           | 0           | 86          |             |
|                              |                              |                                                                                                                     | protease_cysteine_fungi                                                 | Cysteine protease                                                | 0                                                        | 0                               | 0           | 0           | 23          |             |
|                              |                              |                                                                                                                     | protease_serine_fungi                                                   | Serine protease                                                  | 0                                                        | 0                               | 0           | 0           | 170         |             |
|                              |                              |                                                                                                                     |                                                                         | <b>Protein Total</b>                                             |                                                          | <b>0</b>                        | <b>0</b>    | <b>0</b>    | <b>279</b>  |             |
|                              |                              | Starch                                                                                                              | Glucosylase                                                             | Glucosylase                                                      | 126                                                      | 196                             | 322         | 504         | 361         |             |
|                              |                              |                                                                                                                     |                                                                         |                                                                  | <b>Starch Total</b>                                      |                                 | <b>126</b>  | <b>196</b>  | <b>322</b>  | <b>504</b>  |
|                              |                              | Sucrose                                                                                                             | dextranase_fungi                                                        | Dextranase                                                       | 0                                                        | 0                               | 0           | 0           | 18          |             |
|                              |                              |                                                                                                                     | invertase_fungi                                                         | Invertase/beta-fructofuranosidase/saccharase                     | 55                                                       | 28                              | 83          | 98          | 119         |             |
|                              |                              |                                                                                                                     |                                                                         | <b>Sucrose Total</b>                                             |                                                          | <b>55</b>                       | <b>28</b>   | <b>83</b>   | <b>98</b>   |             |
|                              |                              | Tannins                                                                                                             | Tannase_Cdeg                                                            | Tannase                                                          | 55                                                       | 28                              | 83          | 98          | 119         |             |
|                              |                              |                                                                                                                     |                                                                         |                                                                  | <b>Tannins Total</b>                                     |                                 | <b>55</b>   | <b>28</b>   | <b>83</b>   | <b>98</b>   |
|                              |                              |                                                                                                                     |                                                                         | <b>Carbon Degradation Total</b>                                  |                                                          | <b>1303</b>                     | <b>1322</b> | <b>2625</b> | <b>3955</b> |             |
|                              |                              | Metal Homeostasis                                                                                                   | Aluminum Transport                                                      | Al_fungi                                                         | Aluminum resistance putative divalent cation transporter | 4                               | 4           | 8           | 11          | 0           |
|                              |                              |                                                                                                                     |                                                                         |                                                                  |                                                          | <b>Aluminum Transport Total</b> |             | <b>4</b>    | <b>4</b>    | <b>8</b>    |
|                              |                              |                                                                                                                     | Arsenic Transport                                                       | ArsA_fungi                                                       | Arsenical pump-driving ATPase                            | 18                              | 17          | 35          | 48          | 0           |
|                              |                              |                                                                                                                     |                                                                         | <b>Arsenic Transport Total</b>                                   |                                                          | <b>18</b>                       | <b>17</b>   | <b>35</b>   |             |             |
| Iron Transport               | Ferric_reductase_transporter |                                                                                                                     | Ferric reductase transmembrane component (ferric-chelate reductase)     | 32                                                               | 42                                                       | 74                              | 128         | 0           |             |             |
|                              | Ferrioxalate_high_affinity   |                                                                                                                     | Conidial pigment biosynthesis oxidase Ahr1/brown 1                      | 76                                                               | 42                                                       | 118                             | 580         | 0           |             |             |
|                              | Iron_permease_high_affinity  |                                                                                                                     | Plasma membrane iron permease                                           | 30                                                               | 21                                                       | 51                              | 75          | 0           |             |             |
|                              | Iron_permease_low_affinity   |                                                                                                                     | Manganese transporter SMF1                                              | 0                                                                | 2                                                        | 2                               | 4           | 0           |             |             |
|                              | SidA                         |                                                                                                                     | L-Ornithine 5-monooxygenase                                             | 23                                                               | 9                                                        | 32                              | 37          | 0           |             |             |
|                              | SidC                         |                                                                                                                     | Ferrichrome synthetase Sid1                                             | 12                                                               | 5                                                        | 17                              | 19          | 0           |             |             |
|                              | Siderophore_transporter      |                                                                                                                     | Siderochrome-iron transporter MirC                                      | 91                                                               | 94                                                       | 185                             | 261         | 0           |             |             |
| Vacuolar_iron_transporter    | Vacuolar iron transporter    |                                                                                                                     | 30                                                                      | 15                                                               | 45                                                       | 62                              | 0           |             |             |             |
|                              |                              |                                                                                                                     | <b>Iron Transport Total</b>                                             |                                                                  | <b>294</b>                                               | <b>230</b>                      | <b>524</b>  | <b>1166</b> |             |             |
| Potassium Transport          | Trk_fungi                    |                                                                                                                     | Potassium transport protein 1/High-affinity potassium transport protein | 127                                                              | 62                                                       | 189                             | 216         | 0           |             |             |
|                              |                              |                                                                                                                     | <b>Potassium Transport Total</b>                                        |                                                                  | <b>127</b>                                               | <b>62</b>                       | <b>189</b>  |             |             |             |
| Multiple Metal Sequestration | Metallothionein              | Putative metallothionein                                                                                            | 1                                                                       | 2                                                                | 3                                                        | 5                               | 0           |             |             |             |
|                              |                              |                                                                                                                     | <b>Multiple Metal Sequestration Total</b>                               |                                                                  | <b>1</b>                                                 | <b>2</b>                        | <b>3</b>    |             |             |             |
|                              |                              | <b>Metal Homeostasis Total</b>                                                                                      |                                                                         | <b>444</b>                                                       | <b>315</b>                                               | <b>759</b>                      | <b>1446</b> |             |             |             |
| Organic Remediation          | Aromatics                    | Aromatic_peroxygenase                                                                                               | Aromatic peroxygenase precursor                                         | 3                                                                | 1                                                        | 4                               | 4           | 4           |             |             |
|                              |                              | Cl_peroxidase_fungi                                                                                                 | Vanadium chloroperoxidase                                               | 1                                                                | 3                                                        | 4                               | 9           | 4           |             |             |
|                              |                              | P450aro                                                                                                             | PAH-inducible cytochrome P450 monooxygenase                             | 77                                                               | 33                                                       | 110                             | 116         | 141         |             |             |
|                              |                              |                                                                                                                     | <b>Aromatics Total</b>                                                  |                                                                  | <b>81</b>                                                | <b>37</b>                       | <b>118</b>  | <b>129</b>  |             |             |
|                              | Halogenated compounds        | Dyp                                                                                                                 | Decolorizing Peroxidase/dye-decolorizing peroxidase                     | 23                                                               | 6                                                        | 29                              | 29          | 32          |             |             |
|                              |                              |                                                                                                                     |                                                                         | <b>Halogenated Compounds Total</b>                               |                                                          | <b>23</b>                       | <b>6</b>    | <b>29</b>   |             |             |
|                              | Other                        | Cah_fungi                                                                                                           | Cyanamide hydratase, putative                                           | 5                                                                | 4                                                        | 9                               | 12          | 0           |             |             |
|                              |                              |                                                                                                                     |                                                                         | <b>Other Fungi Organic Remediation Total</b>                     |                                                          | <b>109</b>                      | <b>47</b>   | <b>156</b>  |             |             |
|                              |                              |                                                                                                                     | <b>Organic Remediation Total</b>                                        |                                                                  | <b>109</b>                                               | <b>47</b>                       | <b>156</b>  | <b>170</b>  |             |             |
|                              | Phosphorous                  | Phosphorous Total                                                                                                   | Phospholipase_B_fungi                                                   | Phospholipase B/lysophospholipase/lysophospholipase-transacylase | 56                                                       | 32                              | 88          | 113         | 118         |             |
|                              |                              |                                                                                                                     | <b>56</b>                                                               | <b>32</b>                                                        | <b>88</b>                                                | <b>113</b>                      |             |             |             |             |
| Antibiotic resistance        | Antibiotic resistance Total  | MFS_fungi                                                                                                           | Multidrug resistance protein 10                                         | 16                                                               | 11                                                       | 27                              | 35          | 0           |             |             |
|                              |                              | ABC_multidrug_fungi                                                                                                 | TPA: ABC multidrug transporter (Eurofung)                               | 248                                                              | 130                                                      | 378                             | 437         | 0           |             |             |
|                              |                              | <b>Antibiotic resistance Total</b>                                                                                  |                                                                         | <b>264</b>                                                       | <b>141</b>                                               | <b>405</b>                      | <b>472</b>  |             |             |             |
| Virulence                    | Cellular components          | Conidial_laccase                                                                                                    | Conidial pigment biosynthesis oxidase Arb2/brown2                       | 6                                                                | 5                                                        | 11                              | 11          | 0           |             |             |
|                              |                              |                                                                                                                     |                                                                         | <b>Cellular components Total</b>                                 |                                                          | <b>6</b>                        | <b>5</b>    | <b>11</b>   |             |             |
|                              | Colonization/Infection       | Als_adhesin_fungi                                                                                                   | Agglutinin-like protein, putative; cell surface glycoprotein, putative  | 2                                                                | 3                                                        | 5                               | 13          | 0           |             |             |
|                              |                              | Metalloprotease_fungi                                                                                               | Neutral protease                                                        | 70                                                               | 30                                                       | 100                             | 112         | 0           |             |             |
|                              |                              |                                                                                                                     | <b>Colonization/Infection Total</b>                                     |                                                                  | <b>72</b>                                                | <b>33</b>                       | <b>105</b>  | <b>125</b>  |             |             |
| Other                        | Calcineurin_A_fungi          | Serine/threonine-protein phosphatase 2B catalytic subunit/Calmodulin-dependent calcineurin A subunit/Calcineurin A1 | 6                                                                       | 6                                                                | 14                                                       | 20                              | 0           |             |             |             |
|                              |                              |                                                                                                                     | <b>Other Fungi Virulence Total</b>                                      |                                                                  | <b>8</b>                                                 | <b>6</b>                        | <b>14</b>   |             |             |             |
| Survival                     | Survival Total               | Catalase_KatG_fungi                                                                                                 | Catalase-peroxidase/Catalase-2                                          | 15                                                               | 5                                                        | 20                              | 24          | 0           |             |             |
|                              |                              | Superoxide_dismutase_fungi                                                                                          | Cu-Zn superoxide dismutase                                              | 18                                                               | 6                                                        | 24                              | 29          | 0           |             |             |
|                              |                              | <b>Survival Total</b>                                                                                               |                                                                         | <b>33</b>                                                        | <b>11</b>                                                | <b>44</b>                       | <b>53</b>   |             |             |             |



|                         |                                 |                                                                       |                                                                                                                                                                                                                                                                                    |                                                                                                                                                                                                                                                                                                                                                                                        |                                                                                                                                                                                                                                                                                                                                                                                                                                                                                                                                                                                                                   |                                                                         |                                                                               |                                                                                 |                                                                                      |                                                                         |
|-------------------------|---------------------------------|-----------------------------------------------------------------------|------------------------------------------------------------------------------------------------------------------------------------------------------------------------------------------------------------------------------------------------------------------------------------|----------------------------------------------------------------------------------------------------------------------------------------------------------------------------------------------------------------------------------------------------------------------------------------------------------------------------------------------------------------------------------------|-------------------------------------------------------------------------------------------------------------------------------------------------------------------------------------------------------------------------------------------------------------------------------------------------------------------------------------------------------------------------------------------------------------------------------------------------------------------------------------------------------------------------------------------------------------------------------------------------------------------|-------------------------------------------------------------------------|-------------------------------------------------------------------------------|---------------------------------------------------------------------------------|--------------------------------------------------------------------------------------|-------------------------------------------------------------------------|
|                         | <b>Toxin</b>                    | DmaW_ergot<br>Ochratoxin_PKS<br>Patulin_6MSAS<br>Trichodiene_synthase | Tryptophan dimethylallyltransferase/4-dimethylallyltryptophan synthase/All-trans-hexaprenyl-diphosphate synthase/L-tryptophan dimethylallyl transferase/DMATS<br>Ochratoxin A non-ribosomal peptide synthetase<br>Putative 6-MSAS-type polyketide synthase<br>Trichodiene synthase | 33<br>11<br>8<br>3                                                                                                                                                                                                                                                                                                                                                                     | 26<br>2<br>2<br>2                                                                                                                                                                                                                                                                                                                                                                                                                                                                                                                                                                                                 | 59<br>13<br>10<br>5                                                     | 78<br>14<br>11<br>7                                                           | 0<br>0<br>0<br>0                                                                |                                                                                      |                                                                         |
|                         |                                 |                                                                       |                                                                                                                                                                                                                                                                                    | <b>Toxin Total</b>                                                                                                                                                                                                                                                                                                                                                                     | <b>55</b>                                                                                                                                                                                                                                                                                                                                                                                                                                                                                                                                                                                                         | <b>32</b>                                                               | <b>87</b>                                                                     | <b>110</b>                                                                      | <b>0</b>                                                                             |                                                                         |
|                         | <b>Fungi Virulence Total</b>    |                                                                       |                                                                                                                                                                                                                                                                                    | <b>174</b>                                                                                                                                                                                                                                                                                                                                                                             | <b>87</b>                                                                                                                                                                                                                                                                                                                                                                                                                                                                                                                                                                                                         | <b>261</b>                                                              | <b>319</b>                                                                    | <b>0</b>                                                                        |                                                                                      |                                                                         |
|                         | <b>Sulfur cycling</b>           | ATP_sulphurylase<br>PAPS_reductase<br>Sulfate_transporter             | Sulfate adenyllyltransferase/Sulfate adenylate transferase/ATP-sulphurylase<br>Phosphoadenosine phosphosulfate reductase<br>Sulfate permease                                                                                                                                       | 17<br>14<br>81                                                                                                                                                                                                                                                                                                                                                                         | 8<br>15<br>38                                                                                                                                                                                                                                                                                                                                                                                                                                                                                                                                                                                                     | 25<br>29<br>119                                                         | 32<br>42<br>134                                                               | 0<br>0<br>0                                                                     |                                                                                      |                                                                         |
|                         | <b>Sulfur Cycling Total</b>     |                                                                       |                                                                                                                                                                                                                                                                                    | <b>112</b>                                                                                                                                                                                                                                                                                                                                                                             | <b>61</b>                                                                                                                                                                                                                                                                                                                                                                                                                                                                                                                                                                                                         | <b>173</b>                                                              | <b>208</b>                                                                    | <b>0</b>                                                                        |                                                                                      |                                                                         |
|                         | <b>Ammonification</b>           | gluA_fungi<br>urease_arb_fungi                                        | Glutamine synthetase<br>Urease                                                                                                                                                                                                                                                     | 22<br>0                                                                                                                                                                                                                                                                                                                                                                                | 17<br>2                                                                                                                                                                                                                                                                                                                                                                                                                                                                                                                                                                                                           | 39<br>2                                                                 | 64<br>3                                                                       | 0<br>0                                                                          |                                                                                      |                                                                         |
|                         | <b>Ammonification Total</b>     |                                                                       |                                                                                                                                                                                                                                                                                    | <b>22</b>                                                                                                                                                                                                                                                                                                                                                                              | <b>19</b>                                                                                                                                                                                                                                                                                                                                                                                                                                                                                                                                                                                                         | <b>41</b>                                                               | <b>67</b>                                                                     | <b>0</b>                                                                        |                                                                                      |                                                                         |
|                         | <b>N Assimilation</b>           | Nitrate_reductase<br>P450nor                                          | Nitrate reductase<br>Cytochrome P450nor                                                                                                                                                                                                                                            | 74<br>0                                                                                                                                                                                                                                                                                                                                                                                | 55<br>1                                                                                                                                                                                                                                                                                                                                                                                                                                                                                                                                                                                                           | 129<br>1                                                                | 241<br>1                                                                      | 171<br>0                                                                        |                                                                                      |                                                                         |
|                         | <b>N Assimilation Total</b>     |                                                                       |                                                                                                                                                                                                                                                                                    | <b>75</b>                                                                                                                                                                                                                                                                                                                                                                              | <b>55</b>                                                                                                                                                                                                                                                                                                                                                                                                                                                                                                                                                                                                         | <b>130</b>                                                              | <b>242</b>                                                                    | <b>171</b>                                                                      |                                                                                      |                                                                         |
|                         | <b>Fungi Total</b>              |                                                                       |                                                                                                                                                                                                                                                                                    | <b>2559</b>                                                                                                                                                                                                                                                                                                                                                                            | <b>2079</b>                                                                                                                                                                                                                                                                                                                                                                                                                                                                                                                                                                                                       | <b>4638</b>                                                             | <b>6992</b>                                                                   | <b>3872</b>                                                                     |                                                                                      |                                                                         |
|                         | <b>GyrB</b>                     | GyrB                                                                  | DNA topoisomerase type IIA subunit B region 2 domain protein                                                                                                                                                                                                                       | 532                                                                                                                                                                                                                                                                                                                                                                                    | 2234                                                                                                                                                                                                                                                                                                                                                                                                                                                                                                                                                                                                              | 2766                                                                    | 9997                                                                          | 0                                                                               |                                                                                      |                                                                         |
|                         | <b>Phylogenetic</b>             |                                                                       |                                                                                                                                                                                                                                                                                    | <b>532</b>                                                                                                                                                                                                                                                                                                                                                                             | <b>2234</b>                                                                                                                                                                                                                                                                                                                                                                                                                                                                                                                                                                                                       | <b>2766</b>                                                             | <b>9997</b>                                                                   | <b>0</b>                                                                        |                                                                                      |                                                                         |
|                         | <b>GyrB Total</b>               |                                                                       |                                                                                                                                                                                                                                                                                    | <b>532</b>                                                                                                                                                                                                                                                                                                                                                                             | <b>2234</b>                                                                                                                                                                                                                                                                                                                                                                                                                                                                                                                                                                                                       | <b>2766</b>                                                             | <b>9997</b>                                                                   | <b>0</b>                                                                        |                                                                                      |                                                                         |
| <b>Other Categories</b> |                                 |                                                                       |                                                                                                                                                                                                                                                                                    |                                                                                                                                                                                                                                                                                                                                                                                        |                                                                                                                                                                                                                                                                                                                                                                                                                                                                                                                                                                                                                   |                                                                         |                                                                               |                                                                                 |                                                                                      |                                                                         |
|                         | <b>Electron transport</b>       | <b>Photosynthetic</b>                                                 | <b>Bacteriochlorophyll</b>                                                                                                                                                                                                                                                         | BchG<br>BchQ<br>BcIA<br>LPCR                                                                                                                                                                                                                                                                                                                                                           | Bacteriochlorophyll/chlorophyll a synthase<br>Bacteriochlorophyll c8 methyltransferase<br>3,8-Divinyl protochlorophyllide a 8-vinyl reductase, putative chloroplast precursor<br>Light-dependent protochlorophyllide oxidoreductase/Lpor/NADPH-protochlorophyllide oxidoreductase                                                                                                                                                                                                                                                                                                                                 | 28<br>0<br>3<br>20                                                      | 65<br>4<br>6<br>73                                                            | 93<br>4<br>9<br>93                                                              | 163<br>8<br>15<br>171                                                                | 0<br>0<br>0<br>0                                                        |
|                         |                                 |                                                                       |                                                                                                                                                                                                                                                                                    |                                                                                                                                                                                                                                                                                                                                                                                        |                                                                                                                                                                                                                                                                                                                                                                                                                                                                                                                                                                                                                   | <b>Bacteriochlorophyll Total</b>                                        | <b>51</b>                                                                     | <b>148</b>                                                                      | <b>199</b>                                                                           | <b>357</b>                                                              |
|                         |                                 |                                                                       | <b>Bilin</b>                                                                                                                                                                                                                                                                       | Billiverdin_reductase<br>PcyA<br>Peba<br>PebB                                                                                                                                                                                                                                                                                                                                          | Oxidoreductase, putative billiverdin reductase<br>Phycocyanobilin:ferredoxin oxidoreductase<br>15,16-Dihydrobilliverdin:ferredoxin oxidoreductase<br>Phycocyanobilin:ferredoxin oxidoreductase                                                                                                                                                                                                                                                                                                                                                                                                                    | 1<br>8<br>1<br>4                                                        | 5<br>17<br>5<br>9                                                             | 6<br>25<br>6<br>13                                                              | 11<br>42<br>11<br>22                                                                 | 0<br>0<br>0<br>0                                                        |
|                         |                                 |                                                                       |                                                                                                                                                                                                                                                                                    |                                                                                                                                                                                                                                                                                                                                                                                        |                                                                                                                                                                                                                                                                                                                                                                                                                                                                                                                                                                                                                   | <b>Bilin Total</b>                                                      | <b>14</b>                                                                     | <b>36</b>                                                                       | <b>50</b>                                                                            | <b>86</b>                                                               |
|                         |                                 |                                                                       | <b>Carotenoid</b>                                                                                                                                                                                                                                                                  | Beta_carotene_ketolase_crtW<br>Beta_carotene_ketolase_protist<br>Blh<br>Diapophytoene_synthase<br>GGPP_synthase<br>Hydroxyneurosporene_synthase<br>Lycopene_beta_cyclase<br>Lycopene_epsilon_cyclase<br>Methoxyneurosporene_desaturase<br>Phytoene_desaturase_protist<br>Phytoene_synthase<br>Phytoene_synthase_protist<br>Spheroidene_monooxygenase<br>Zeaxanthin_glucosyltransferase | Beta-carotene hydroxylase<br>Beta-carotene ketolase/Beta-carotene oxygenase<br>Beta-carotene 15,15-dioxygenase/carotene dioxygenase/carotene 15,15-dioxygenase/beta-carotene 15,15-monooxygenase<br>Dehydroisqualene synthase/4,4'-diapophytoene synthase/Diapophytoene synthase<br>Phytoene synthase<br>Hydroxyneurosporene synthase<br>Lycopene cyclase, beta and epsilon<br>Putative lycopene epsilon cyclase<br>Putative methoxyneurosporene dehydrogenase<br>Hypothetical protein VOLCADRAFT_88495<br>Phytoene synthase<br>Phytoene synthase<br>Spheroidene monooxygenase<br>Glycosyltransferase, MGT family | 1<br>3<br>1<br>3<br>24<br>4<br>22<br>2<br>5<br>12<br>59<br>11<br>4<br>9 | 26<br>4<br>31<br>6<br>40<br>46<br>66<br>24<br>9<br>10<br>350<br>9<br>19<br>26 | 37<br>5<br>34<br>9<br>64<br>50<br>88<br>26<br>14<br>22<br>409<br>20<br>23<br>13 | 87<br>16<br>65<br>15<br>107<br>100<br>157<br>50<br>24<br>29<br>796<br>28<br>42<br>17 | 0<br>0<br>0<br>0<br>0<br>0<br>0<br>0<br>0<br>0<br>0<br>0<br>0<br>0<br>0 |
|                         |                                 |                                                                       |                                                                                                                                                                                                                                                                                    |                                                                                                                                                                                                                                                                                                                                                                                        |                                                                                                                                                                                                                                                                                                                                                                                                                                                                                                                                                                                                                   | <b>Carotenoid Total</b>                                                 | <b>170</b>                                                                    | <b>644</b>                                                                      | <b>814</b>                                                                           | <b>1533</b>                                                             |
|                         |                                 |                                                                       | <b>Chlorophyll</b>                                                                                                                                                                                                                                                                 | AcsF                                                                                                                                                                                                                                                                                                                                                                                   | Magnesium-protoporphyrin IX monomethyl ester aerobic oxidative cyclase                                                                                                                                                                                                                                                                                                                                                                                                                                                                                                                                            | 7                                                                       | 78                                                                            | 85                                                                              | 163                                                                                  | 0                                                                       |
|                         |                                 |                                                                       | <b>Rhodopsin</b>                                                                                                                                                                                                                                                                   | Bacteriorhodopsin                                                                                                                                                                                                                                                                                                                                                                      | Bacteriorhodopsin                                                                                                                                                                                                                                                                                                                                                                                                                                                                                                                                                                                                 | 7                                                                       | 19                                                                            | 26                                                                              | 44                                                                                   | 33                                                                      |
|                         |                                 |                                                                       |                                                                                                                                                                                                                                                                                    |                                                                                                                                                                                                                                                                                                                                                                                        |                                                                                                                                                                                                                                                                                                                                                                                                                                                                                                                                                                                                                   | <b>Rhodopsin Total</b>                                                  | <b>7</b>                                                                      | <b>19</b>                                                                       | <b>26</b>                                                                            | <b>44</b>                                                               |
|                         |                                 |                                                                       | <b>Photosynthetic Total</b>                                                                                                                                                                                                                                                        |                                                                                                                                                                                                                                                                                                                                                                                        |                                                                                                                                                                                                                                                                                                                                                                                                                                                                                                                                                                                                                   | <b>249</b>                                                              | <b>925</b>                                                                    | <b>1174</b>                                                                     | <b>2183</b>                                                                          | <b>33</b>                                                               |
|                         | <b>Cytochrome</b>               | <b>c-type</b>                                                         | C_type_cytochrome<br>C_type_cytochrome_1<br>C_type_cytochrome_3<br>C_type_cytochrome_4<br>C_type_cytochrome_5<br>C_type_cytochrome_6<br>C_type_cytochrome_b                                                                                                                        | Multicopper oxidase family protein<br>Cytochrome C oxidase subunit transmembrane protein<br>Cytochrome c class I<br>Cytochrome c-type biogenesis protein DsbD, protein-disulfide reductase<br>Conserved hypothetical protein<br>Cytochrome c assembly protein<br>Periplasmic nitrate reductase subunit NapB                                                                            | 0<br>1<br>3<br>4<br>0<br>3<br>15                                                                                                                                                                                                                                                                                                                                                                                                                                                                                                                                                                                  | 21<br>45<br>35<br>10<br>1<br>50<br>12                                   | 21<br>46<br>38<br>14<br>1<br>53<br>31                                         | 42<br>91<br>77<br>37<br>2<br>103<br>43                                          | 0<br>0<br>0<br>0<br>0<br>0<br>0                                                      |                                                                         |
|                         |                                 |                                                                       | <b>other</b>                                                                                                                                                                                                                                                                       | Cytochrome<br>P450                                                                                                                                                                                                                                                                                                                                                                     | Cytochrome c, class I<br>Putative cytochrome P450                                                                                                                                                                                                                                                                                                                                                                                                                                                                                                                                                                 | 30<br>6                                                                 | 174<br>21                                                                     | 204<br>47                                                                       | 395<br>0                                                                             | 0<br>0                                                                  |
|                         |                                 |                                                                       |                                                                                                                                                                                                                                                                                    |                                                                                                                                                                                                                                                                                                                                                                                        |                                                                                                                                                                                                                                                                                                                                                                                                                                                                                                                                                                                                                   | <b>Other Cytochrome Total</b>                                           | <b>302</b>                                                                    | <b>167</b>                                                                      | <b>469</b>                                                                           | <b>632</b>                                                              |
|                         |                                 |                                                                       | <b>Cytochrome Total</b>                                                                                                                                                                                                                                                            |                                                                                                                                                                                                                                                                                                                                                                                        |                                                                                                                                                                                                                                                                                                                                                                                                                                                                                                                                                                                                                   | <b>332</b>                                                              | <b>341</b>                                                                    | <b>673</b>                                                                      | <b>1027</b>                                                                          | <b>0</b>                                                                |
|                         | <b>Hydrogenase</b>              | Hydrogenase<br>Ni_Fe_hydrogenase                                      | Nickel-dependent hydrogenase, large subunit<br>Putative (Fe) hydrogenase, HymD subunit                                                                                                                                                                                             | 24<br>7                                                                                                                                                                                                                                                                                                                                                                                | 65<br>17                                                                                                                                                                                                                                                                                                                                                                                                                                                                                                                                                                                                          | 89<br>24                                                                | 153<br>38                                                                     | 0<br>0                                                                          |                                                                                      |                                                                         |
|                         |                                 |                                                                       | <b>Hydrogenase Total</b>                                                                                                                                                                                                                                                           |                                                                                                                                                                                                                                                                                                                                                                                        | <b>31</b>                                                                                                                                                                                                                                                                                                                                                                                                                                                                                                                                                                                                         | <b>82</b>                                                               | <b>113</b>                                                                    | <b>191</b>                                                                      | <b>0</b>                                                                             |                                                                         |
|                         | <b>Electron Transport Total</b> |                                                                       |                                                                                                                                                                                                                                                                                    | <b>612</b>                                                                                                                                                                                                                                                                                                                                                                             | <b>1348</b>                                                                                                                                                                                                                                                                                                                                                                                                                                                                                                                                                                                                       | <b>1960</b>                                                             | <b>3401</b>                                                                   | <b>33</b>                                                                       |                                                                                      |                                                                         |
|                         | <b>Total</b>                    |                                                                       |                                                                                                                                                                                                                                                                                    | <b>31247</b>                                                                                                                                                                                                                                                                                                                                                                           | <b>133592</b>                                                                                                                                                                                                                                                                                                                                                                                                                                                                                                                                                                                                     | <b>161961</b>                                                           | <b>385417</b>                                                                 | <b>57498</b>                                                                    |                                                                                      |                                                                         |

\*Values are for 5.0M
